# Supplementary material for: Mapping the O‐glycoproteome using site‐specific extraction of O‐linked glycopeptides (EXoO)
Source: PubMed Central journal article supplement (PMC6243375; doi:10.15252/msb.20188486), 2018-11-20
Supplement: MSB-14-e8486-s001.pdf [file MSB-14-e8486-s001.pdf]

## **Table of Contents**

**Appendix Figure S1:** Identification of the O-linked glycan at a new O-linked glycosylation site at Ser-290 in bovine fetuin.

**Appendix Figure S2:** Supplemental annotated spectra from analysis of human kidney tissue.

**Appendix Figure S3:** Motif analysis of the O-linked glycosylation sites identified from different samples.

**Appendix Figure S4:** Biological process and molecular functions of the identified O-linked glycoproteins.

**Appendix Figure S5:** Localization of O-linked glycosylation sites to protein structural and topological features.

**Appendix Table S1:** Differentially expressed O-linked glycoproteins in tumor vs normal kidney tissues.



## Appendix Figure S2: Supplemental annotated spectra from analysis of human kidney tissue.

Sequence: TYWPFYPETESS, T1-Hex(1)HexNAc(1) (365.13220 Da)

Charge: +2, Monoisotopic m/z: 936.39147 Da (+0.56 mmu/+0.6 ppm), MH+: 1871.77566 Da, RT: 97.3593 min,

Identified with: Sequest HT (v1.17); XCorr:1.39, Percolator q-Value:7.3e-4, Percolator PEP:3.2e-2, Ions matched by search engine: 0/0

Fragment match tolerance used for search: 0.06 Da

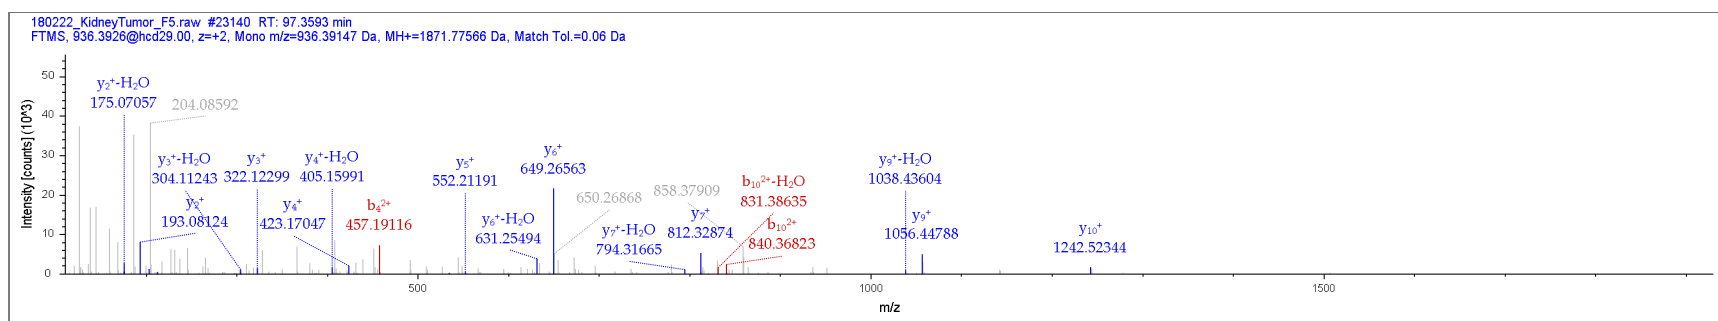

Sequence: TYSVCVMPLGPGR, C5-Carbamidomethyl (57.02146 Da), M7-Oxidation (15.99492 Da), T1-Hex(1)HexNAc(1) (365.13220 Da)

Charge: +3, Monoisotopic m/z: 606.61496 Da (+0.25 mmu/+0.42 ppm), MH+: 1817.83034 Da, RT: 65.5469 min,

Identified with: Sequest HT (v1.17); XCorr:2.73, Percolator q-Value:9.2e-5, Percolator PEP:6.9e-3, Ions matched by search engine: 0/0

Fragment match tolerance used for search: 0.06 Da

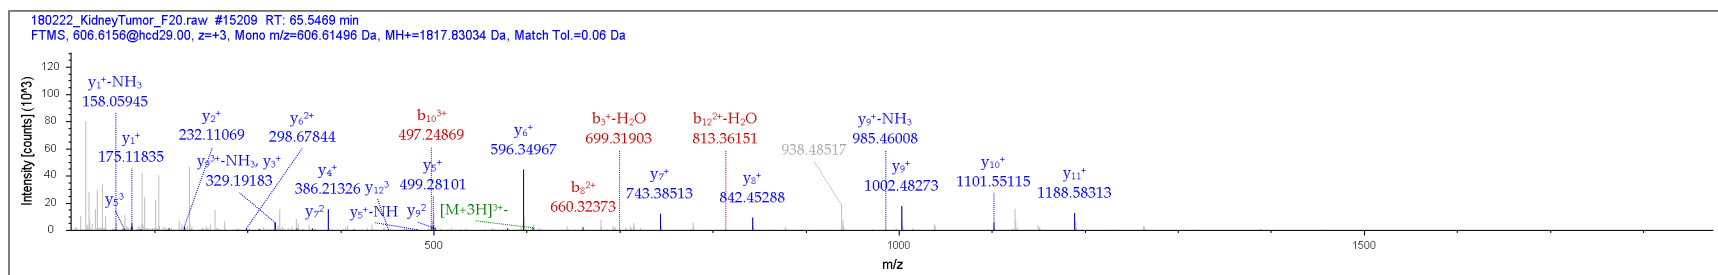

Sequence: TYSAMCPFGCHCLR, C6-Carbamidomethyl (57.02146 Da), C10-Carbamidomethyl (57.02146 Da), C12-Carbamidomethyl (57.02146 Da), M5-Oxidation (15.99492 Da), T1-Hex(1)HexNAc(1) (365.13220 Da)

Charge: +3, Monoisotopic m/z: 759.97265 Da (+0.08 mmu/+0.1 ppm), MH+: 2277.90340 Da, RT: 48.7438 min,

Identified with: Sequest HT (v1.17); XCorr:4.08, Percolator q-Value:0.0e0, Percolator PEP:1.2e-5, Ions matched by search engine: 0/0

Fragment match tolerance used for search: 0.06 Da

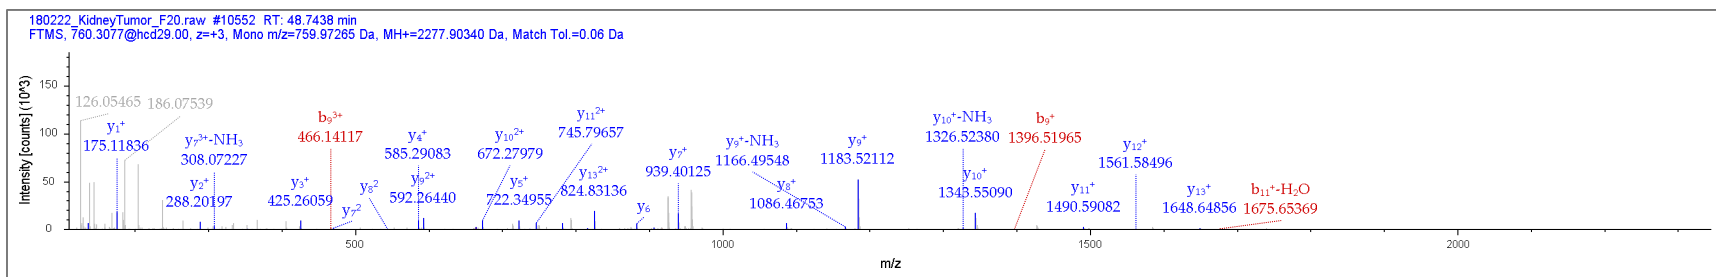

Sequence: TYQVPDALEWEQQNQLVR, T1-Hex(1)HexNAc(1) (365.13220 Da)

Charge: +2, Monoisotopic m/z: 1320.12895 Da (+1.74 mmu/+1.32 ppm), MH+: 2639.25062 Da, RT: 94.0356 min,

Identified with: Sequest HT (v1.17); XCorr:3.62, Percolator q-Value:0.0e0, Percolator PEP:8.1e-6, Ions matched by search engine: 0/0

Fragment match tolerance used for search: 0.06 Da

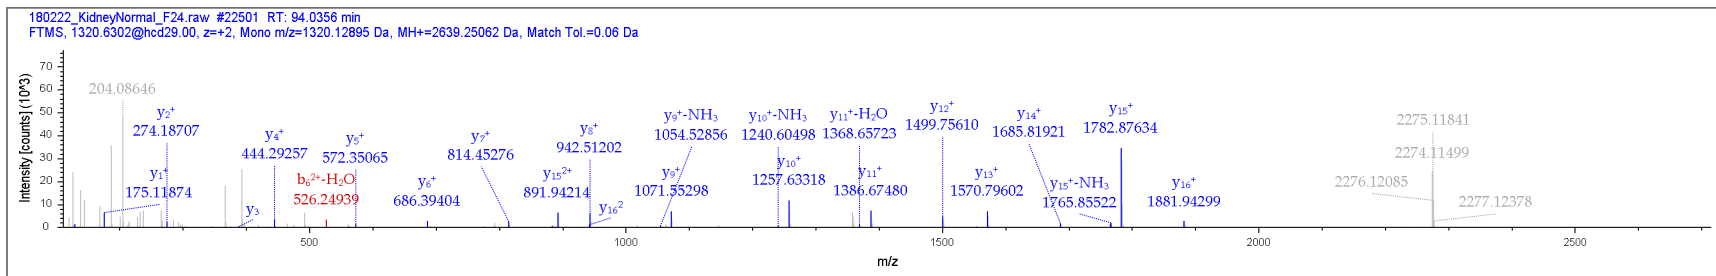

Sequence: TWPDMELPLPR, M5-Oxidation (15.99492 Da), T1-Hex(1)HexNAc(1) (365.13220 Da)

Charge: +3, Monoisotopic m/z: 579.27558 Da (+0.89 mmu/+1.54 ppm), MH+: 1735.81217 Da, RT: 92.9942 min,

Identified with: Sequest HT (v1.17); XCorr:2.24, Percolator q-Value:5.0e-5, Percolator PEP:6.6e-3, Ions matched by search engine: 0/0

Fragment match tolerance used for search: 0.06 Da

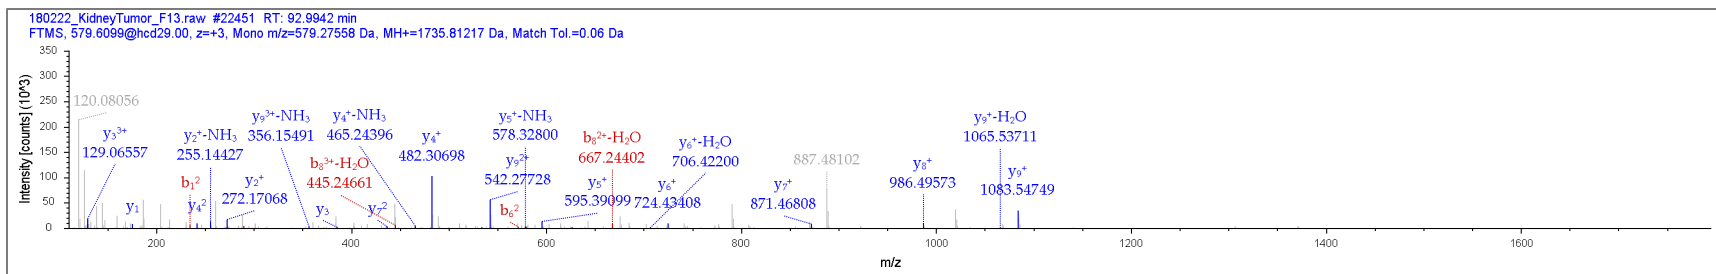

Sequence: TWPDMELPLPR, M5-Oxidation (15.99492 Da), T1-Hex(1)HexNAc(1) (365.13220 Da)

Charge: +3, Monoisotopic m/z: 579.27591 Da (+1.22 mmu/+2.11 ppm), MH+: 1735.81316 Da, RT: 82.6916 min,

Identified with: Sequest HT (v1.17); XCorr:2.32, Percolator q-Value:0.0e0, Percolator PEP:1.0e-3, Ions matched by search engine: 0/0

Fragment match tolerance used for search: 0.06 Da

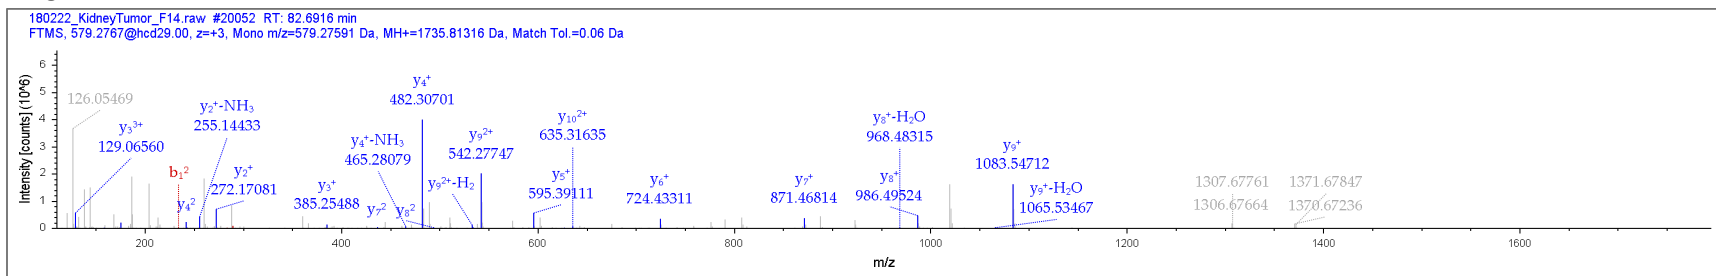

Sequence: TWPDMEPLPR, M5-Oxidation (15.99492 Da), T1-Hex(1)HexNAc(1) (365.13220 Da)

Charge: +2, Monoisotopic m/z: 868.40914 Da (+0.76 mmu/+0.87 ppm), MH+: 1735.81101 Da, RT: 83.6742 min,

Identified with: Sequest HT (v1.17); XCorr:1.30, Percolator q-Value:5.4e-4, Percolator PEP:3.0e-2, Ions matched by search engine: 0/0

Fragment match tolerance used for search: 0.06 Da

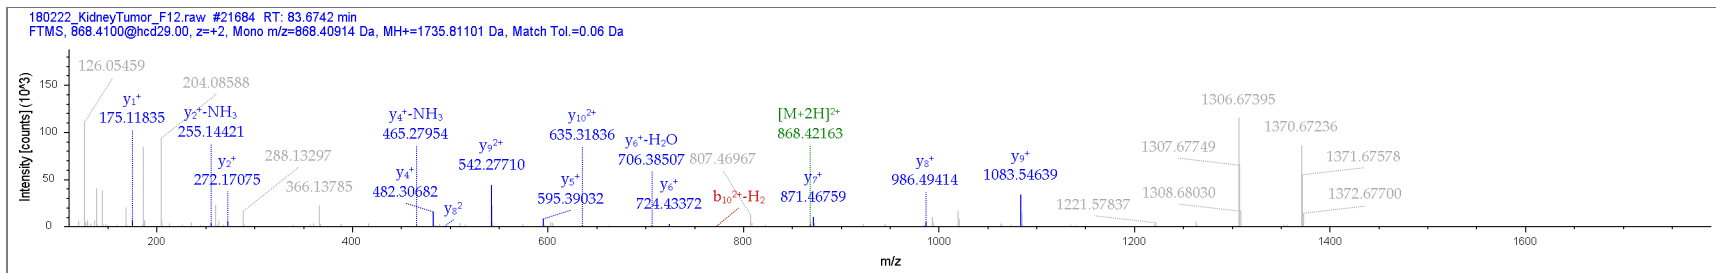

Sequence: TWPDMEPLPR, M5-Oxidation (15.99492 Da), T1-Hex(1)HexNAc(1) (365.13220 Da)

Charge: +3, Monoisotopic m/z: 579.27395 Da (-0.73 mmu/-1.26 ppm), MH+: 1735.80730 Da, RT: 95.2596 min,

Identified with: Sequest HT (v1.17); XCorr:2.26, Percolator q-Value:0.0e0, Percolator PEP:1.3e-3, Ions matched by search engine: 0/0

Fragment match tolerance used for search: 0.06 Da

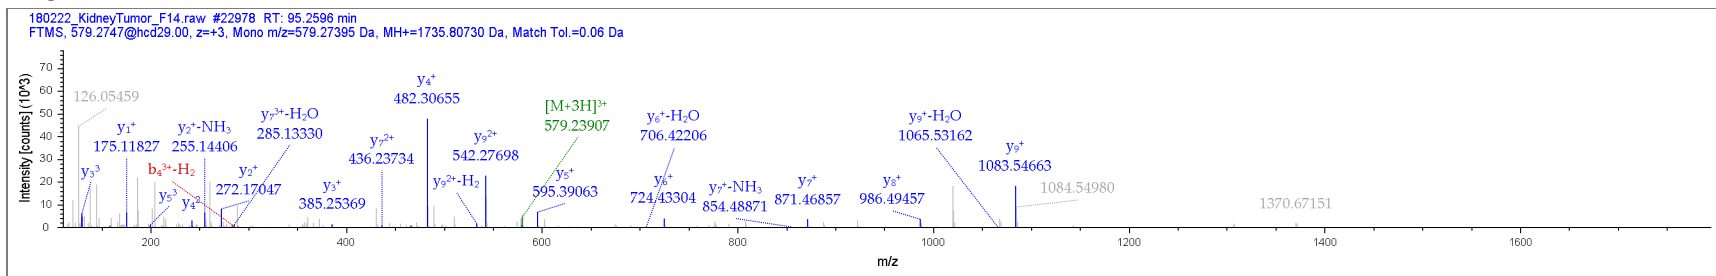

Sequence: TWPDMEPLPR, M5-Oxidation (15.99492 Da), T1-Hex(1)HexNAc(1) (365.13220 Da)

Charge: +2, Monoisotopic m/z: 868.40736 Da (-1.03 mmu/-1.18 ppm), MH+: 1735.80744 Da, RT: 82.6101 min,

Identified with: Sequest HT (v1.17); XCorr:1.38, Percolator q-Value:0.0e0, Percolator PEP:2.0e-3, Ions matched by search engine: 0/0

Fragment match tolerance used for search: 0.06 Da

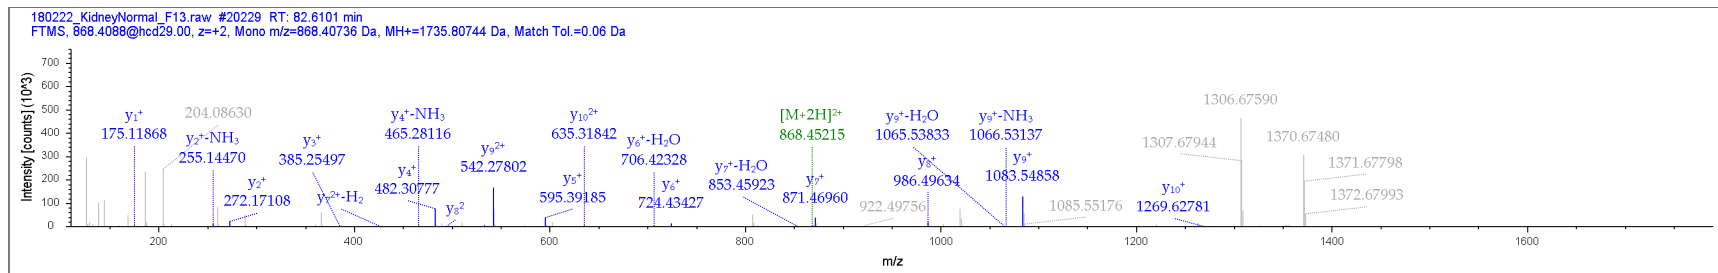

Sequence: TWPDMEPLPR, M5-Oxidation (15.99492 Da), T1-Hex(1)HexNAc(1) (365.13220 Da)

Charge: +2, Monoisotopic m/z: 868.40775 Da (-0.64 mmu/-0.73 ppm), MH+: 1735.80822 Da, RT: 87.6011 min,

Identified with: Sequest HT (v1.17); XCorr:1.48, Percolator q-Value:0.0e0, Percolator PEP:5.6e-4, Ions matched by search engine: 0/0

Fragment match tolerance used for search: 0.06 Da

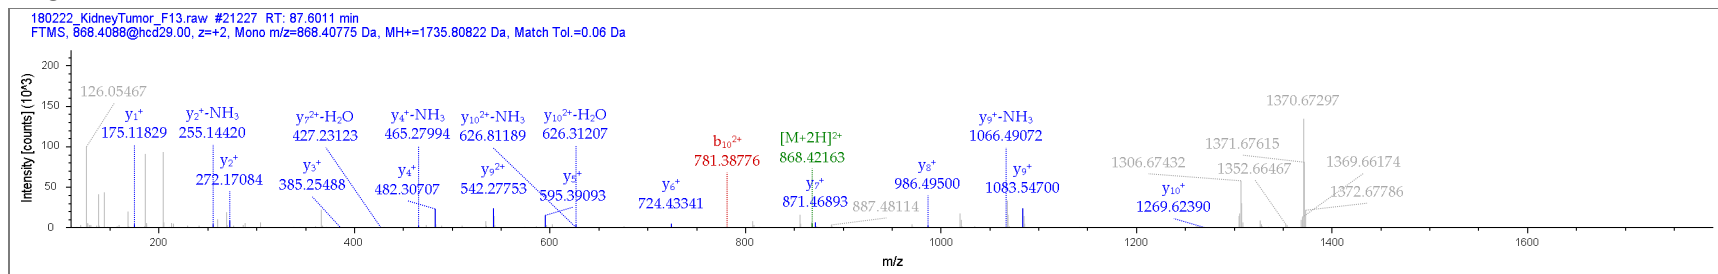

Sequence: TWPDMEPLPR, M5-Oxidation (15.99492 Da), T1-Hex(1)HexNAc(1) (365.13220 Da)

Charge: +3, Monoisotopic m/z: 579.27492 Da (+0.23 mmu/+0.4 ppm), MH+: 1735.81020 Da, RT: 85.1609 min,

Identified with: Sequest HT (v1.17); XCorr:2.05, Percolator q-Value:5.0e-5, Percolator PEP:2.1e-3, Ions matched by search engine: 0/0

Fragment match tolerance used for search: 0.06 Da

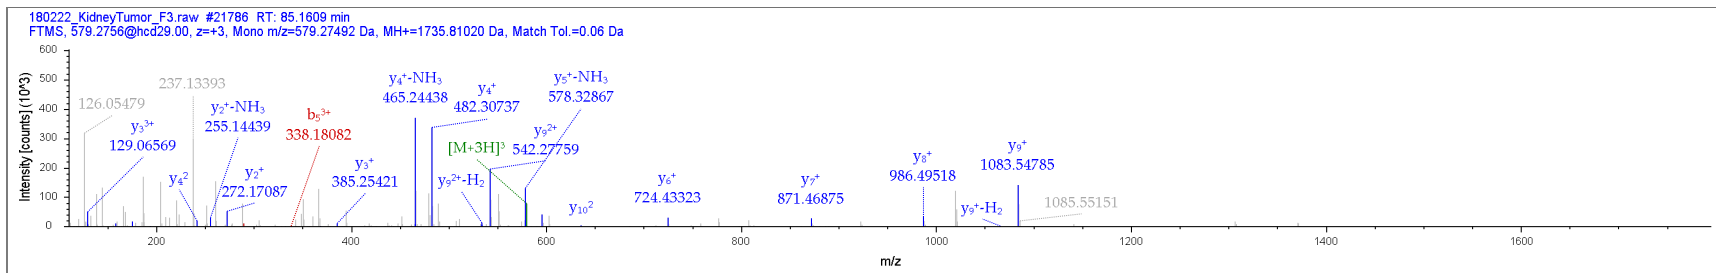

Sequence: TWNPGSSER, T1-Hex(1)HexNAc(1) (365.13220 Da)

Charge: +2, Monoisotopic m/z: 699.80421 Da (-0.4 mmu/-0.57 ppm), MH+: 1398.60115 Da, RT: 34.9253 min,

Identified with: Sequest HT (v1.17); XCorr:1.44, Percolator q-Value:2.1e-4, Percolator PEP:1.4e-2, Ions matched by search engine: 0/0

Fragment match tolerance used for search: 0.06 Da

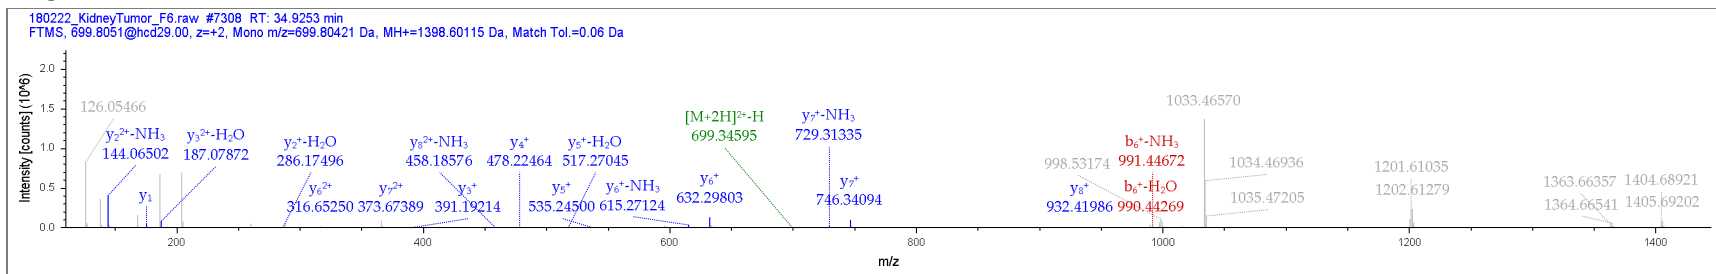



Sequence: TWLNPDPQSQK, K10-GuanidinyI (42.02180 Da), T1-Hex(1)HexNAc(1) (365.13220 Da)

Charge: +2, Monoisotopic m/z: 796.87429 Da (-1.28 mmu/-1.6 ppm), MH+: 1592.74131 Da, RT: 57.4758 min,

Identified with: Sequest HT (v1.17); XCorr:0.95, Percolator q-Value:3.6e-3, Percolator PEP:1.2e-1, Ions matched by search engine: 0/0

Fragment match tolerance used for search: 0.06 Da

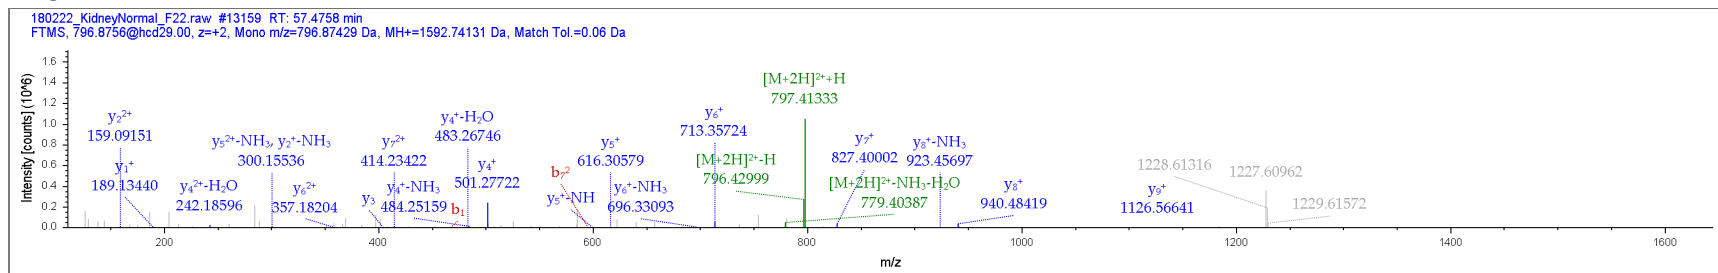

Sequence: TWKPGSSGPGSTGSWN, K3-GuanidinyI (42.02180 Da), T1-Hex(1)HexNAc(1) (365.13220 Da)

Charge: +2, Monoisotopic m/z: 1006.94605 Da (+0.81 mmu/+0.81 ppm), MH+: 2012.88483 Da, RT: 56.0408 min,

Identified with: Sequest HT (v1.17); XCorr:2.34, Percolator q-Value:0.0e0, Percolator PEP:3.1e-3, Ions matched by search engine: 0/0

Fragment match tolerance used for search: 0.06 Da

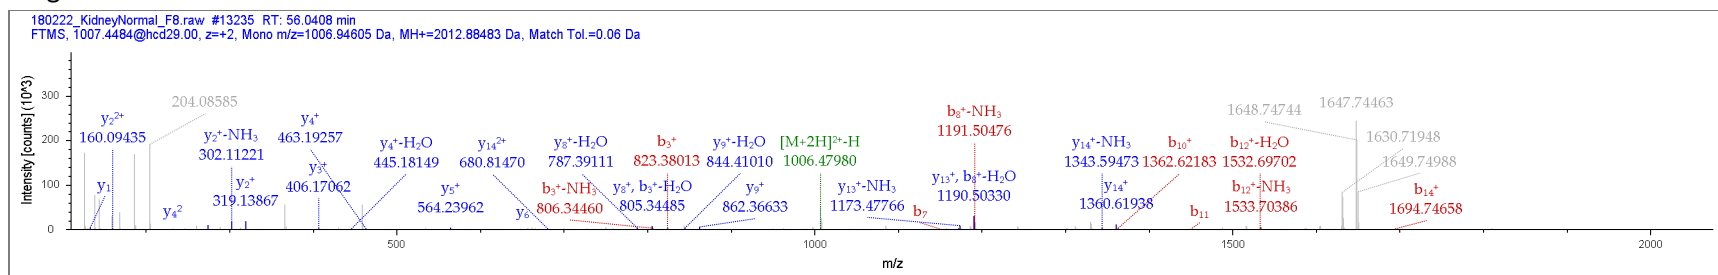

Sequence: TWEEQQTSVLHLVGDNFR, T1-Hex(1)HexNAc(1) (365.13220 Da)

Charge: +3, Monoisotopic m/z: 842.06713 Da (+1.01 mmu/+1.2 ppm), MH+: 2524.18684 Da, RT: 89.6926 min,

Identified with: Sequest HT (v1.17); XCorr:4.82, Percolator q-Value:0.0e0, Percolator PEP:2.0e-6, Ions matched by search engine: 0/0

Fragment match tolerance used for search: 0.06 Da

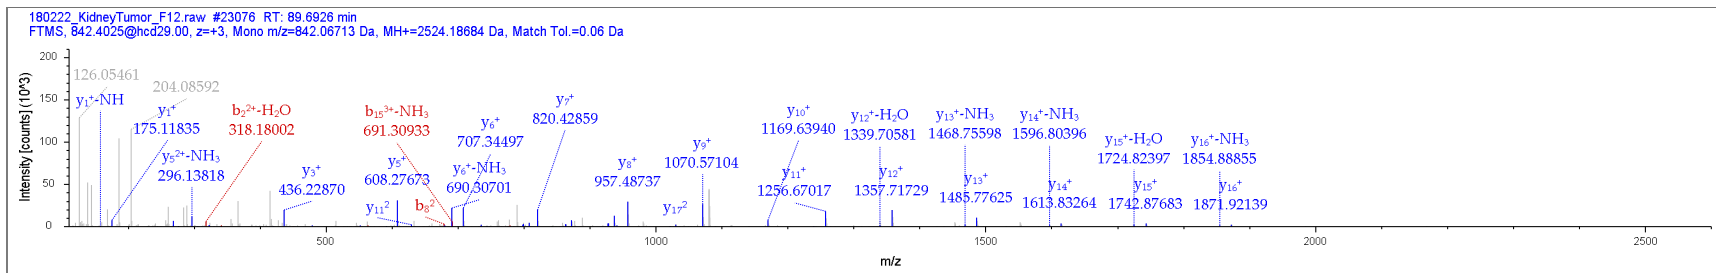

Sequence: TWDGSVR, T1-Hex(1)HexNAc(1) (365.13220 Da)

Charge: +2, Monoisotopic m/z: 593.26722 Da (+0.09 mmu/+0.15 ppm), MH+: 1185.52717 Da, RT: 32.2525 min,

Identified with: Sequest HT (v1.17); XCorr:1.02, Percolator q-Value:4.0e-4, Percolator PEP:3.7e-2, Ions matched by search engine: 0/0

Fragment match tolerance used for search: 0.06 Da

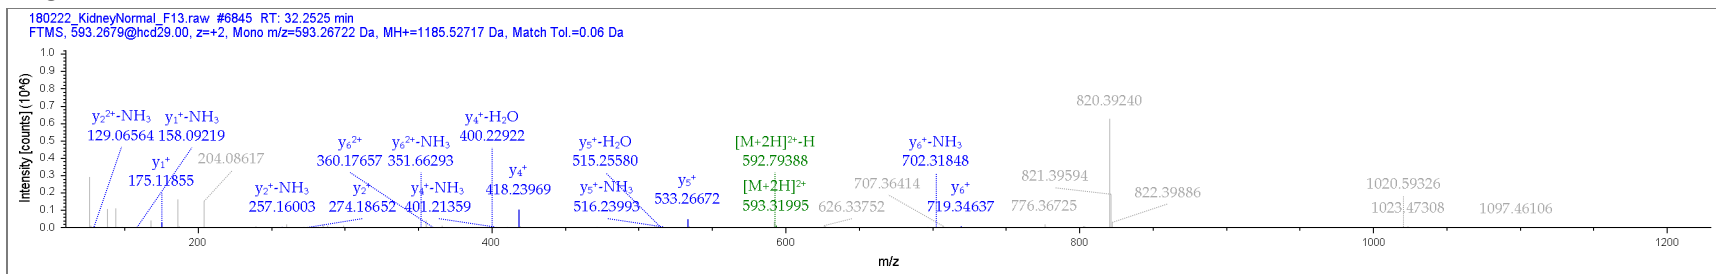

Sequence: TVYPPEETGER, T1-Hex(1)HexNAc(1) (365.13220 Da)

Charge: +2, Monoisotopic m/z: 886.39178 Da (+0.34 mmu/+0.38 ppm), MH+: 1771.77629 Da, RT: 38.9056 min,

Identified with: Sequest HT (v1.17); XCorr:1.49, Percolator q-Value:9.2e-5, Percolator PEP:8.4e-3, Ions matched by search engine: 0/0

Fragment match tolerance used for search: 0.06 Da

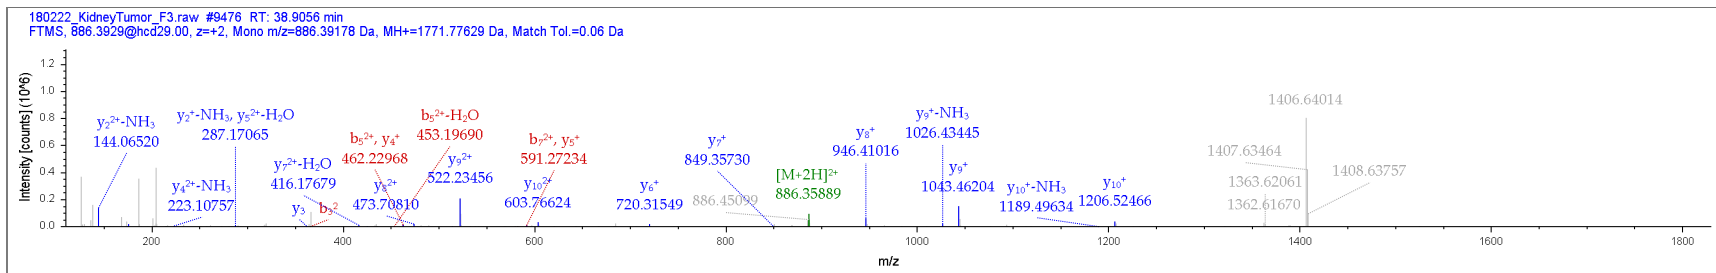

Sequence: TVYPPEETGER, T1-Hex(1)HexNAc(1) (365.13220 Da)

Charge: +2, Monoisotopic m/z: 886.39108 Da (-0.37 mmu/-0.41 ppm), MH+: 1771.77488 Da, RT: 37.2371 min,

Identified with: Sequest HT (v1.17); XCorr:1.30, Percolator q-Value:0.0e0, Percolator PEP:4.7e-4, Ions matched by search engine: 0/0

Fragment match tolerance used for search: 0.06 Da

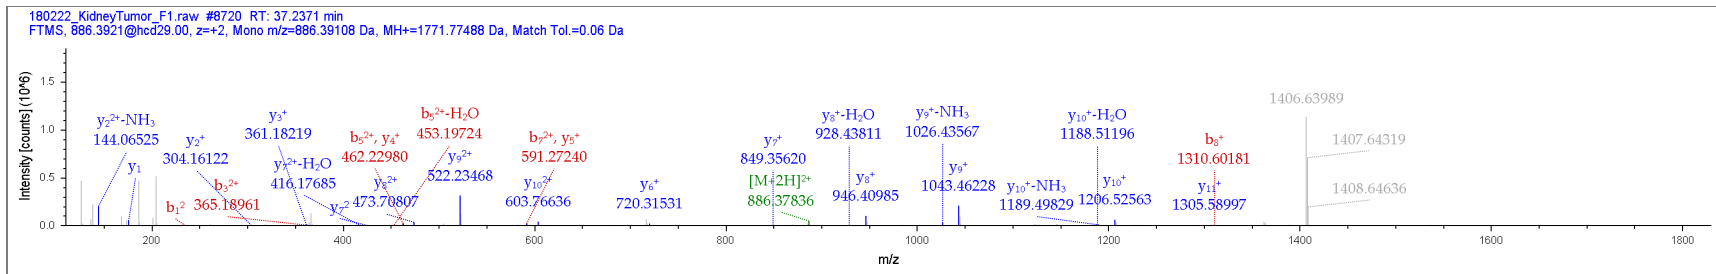

Sequence: TVVGIPDGTAVVGR, T1-HexNAc (203.07937 Da)

Charge: +3, Monoisotopic m/z: 515.28214 Da (-0.25 mmu/-0.49 ppm), MH+: 1543.83186 Da, RT: 69.5726 min,

Identified with: Sequest HT (v1.17); XCorr:3.66, Percolator q-Value:0.0e0, Percolator PEP:6.4e-3, Ions matched by search engine: 0/0

Fragment match tolerance used for search: 0.06 Da

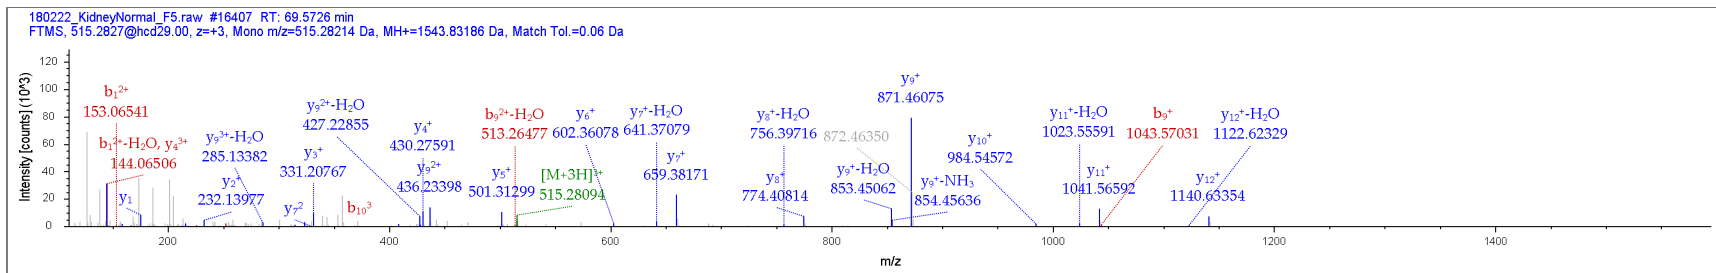

Sequence: TVTVPEGDTAR, T1-Hex(1)HexNAc(1) (365.13220 Da)

Charge: +2, Monoisotopic m/z: 755.85941 Da (-0.17 mmu/-0.23 ppm), MH+: 1510.71154 Da, RT: 36.2377 min,

Identified with: Sequest HT (v1.17); XCorr:1.57, Percolator q-Value:0.0e0, Percolator PEP:6.9e-3, Ions matched by search engine: 0/0

Fragment match tolerance used for search: 0.06 Da

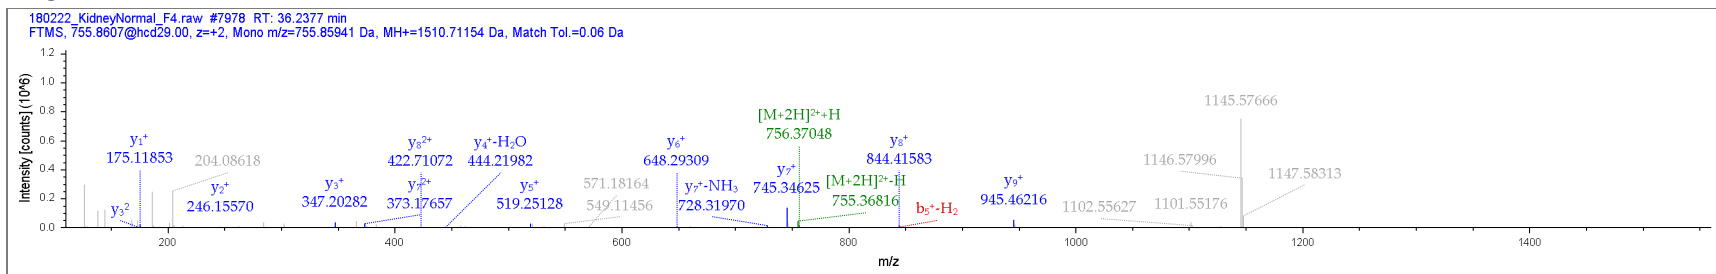

Sequence: TVTTVGFMLSTQVR, M8-Oxidation (15.99492 Da), T1-Hex(1)HexNAc(1) (365.13220 Da)

Charge: +3, Monoisotopic m/z: 673.33821 Da (+0.08 mmu/+0.13 ppm), MH+: 2018.00007 Da, RT: 75.2133 min,

Identified with: Sequest HT (v1.17); XCorr:3.35, Percolator q-Value:0.0e0, Percolator PEP:7.0e-4, Ions matched by search engine: 0/0

Fragment match tolerance used for search: 0.06 Da

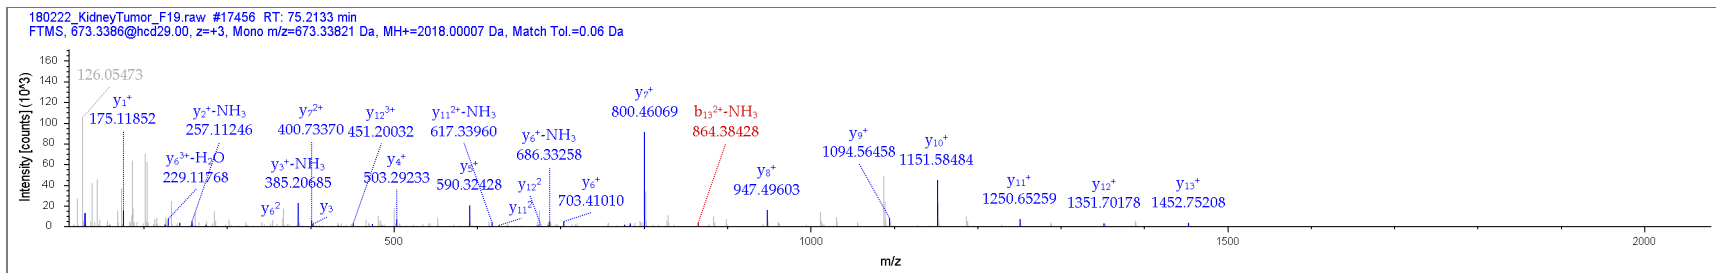

Sequence: TVSTNFPQTIEPAK, K14-GuanidinyI (42.02180 Da), T1-Hex(1)HexNAc(1) (365.13220 Da), S3-Hex(1)HexNAc(1) (365.13220 Da), T4-Hex(1)HexNAc(1) (365.13220 Da)

Charge: +3, Monoisotopic m/z: 890.74507 Da (+2.26 mmu/+2.53 ppm), MH+: 2670.22065 Da, RT: 57.9131 min,

Identified with: Sequest HT (v1.17); XCorr:1.94, Percolator q-Value:2.8e-4, Percolator PEP:2.0e-2, Ions matched by search engine: 0/0

Fragment match tolerance used for search: 0.06 Da

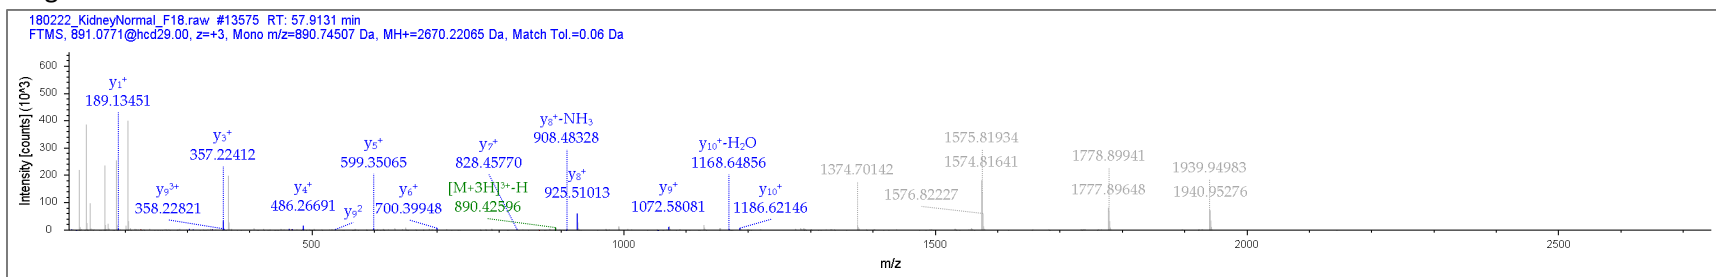

Sequence: TVSSFSLNVEYAIQAEK, K17-GuanidinyI (42.02180 Da), S3-Hex(1)HexNAc(1) (365.13220 Da), S4-Hex(1)HexNAc(1) (365.13220 Da)

Charge: +3, Monoisotopic m/z: 886.75320 Da (+1.56 mmu/+1.76 ppm), MH+: 2658.24506 Da, RT: 94.0757 min,

Identified with: Sequest HT (v1.17); XCorr:3.23, Percolator q-Value:0.0e0, Percolator PEP:4.1e-4, Ions matched by search engine: 0/0

Fragment match tolerance used for search: 0.06 Da

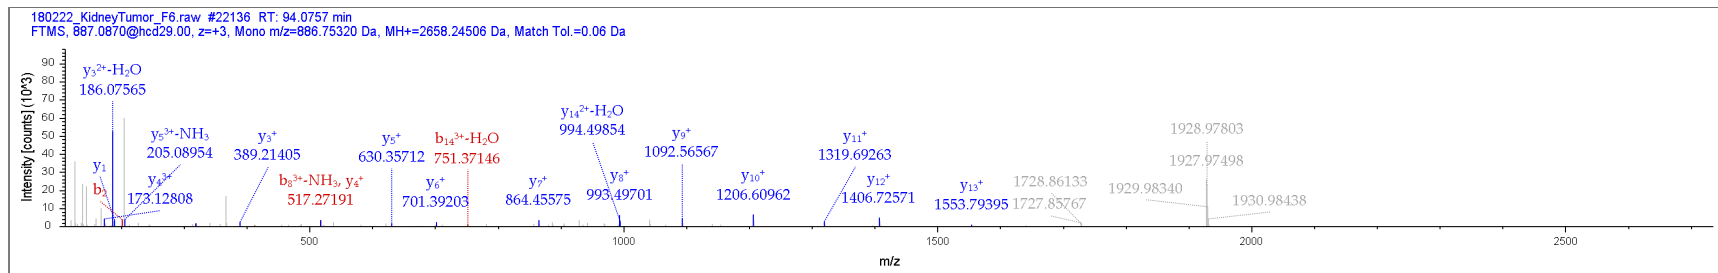

Sequence: TVSHPIAK, K8-GuanidinyI (42.02180 Da), T1-Hex(1)HexNAc(1) (365.13220 Da)

Charge: +3, Monoisotopic m/z: 420.55359 Da (-0.52 mmu/-1.24 ppm), MH+: 1259.64621 Da, RT: 22.7310 min,

Identified with: Sequest HT (v1.17); XCorr:1.91, Percolator q-Value:1.4e-4, Percolator PEP:1.2e-2, Ions matched by search engine: 0/0

Fragment match tolerance used for search: 0.06 Da

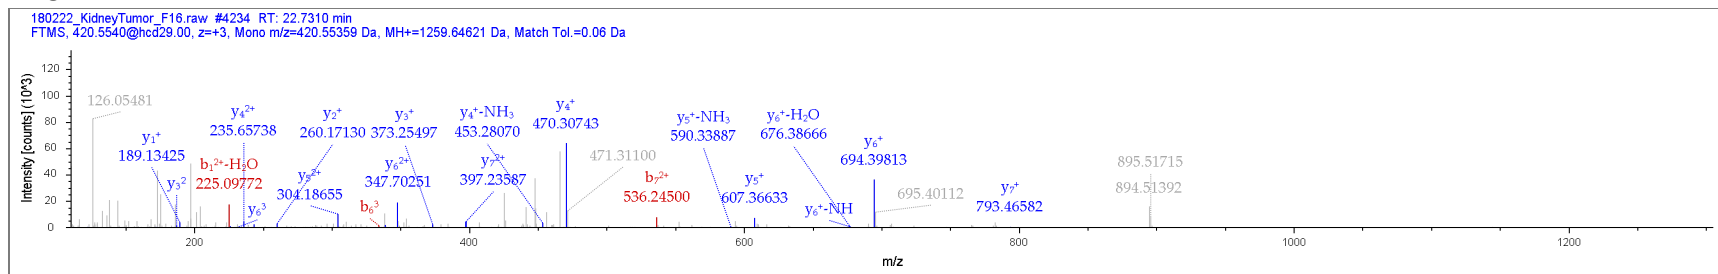

Sequence: TVQSGSHTALGDR, T1-Hex(1)HexNAc(1) (365.13220 Da)

Charge: +3, Monoisotopic m/z: 584.27483 Da (+0.32 mmu/+0.55 ppm), MH+: 1750.80993 Da, RT: 22.5171 min,

Identified with: Sequest HT (v1.17); XCorr:3.09, Percolator q-Value:0.0e0, Percolator PEP:4.9e-4, Ions matched by search engine: 0/0

Fragment match tolerance used for search: 0.06 Da

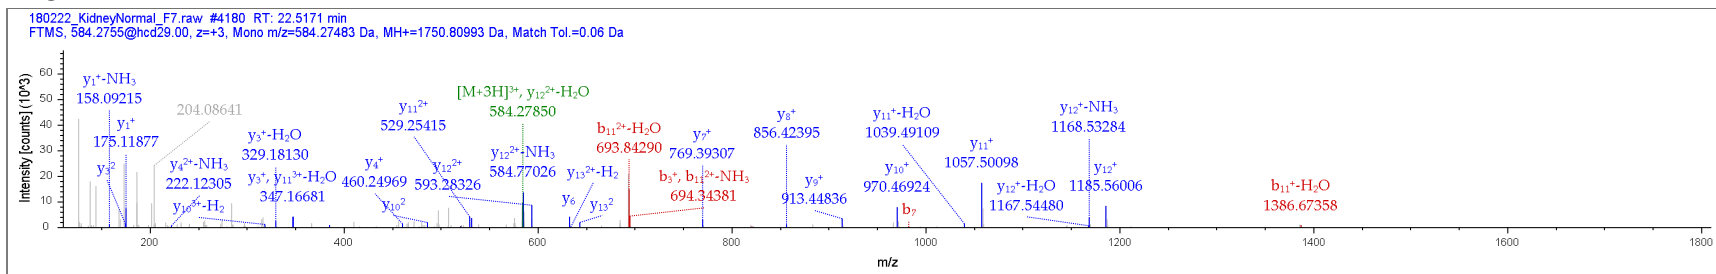

Sequence: TVPPSGLSVPFSTWDQDHLR, T1-Hex(1)HexNAc(1) (365.13220 Da)

Charge: +3, Monoisotopic m/z: 907.09584 Da (-0.12 mmu/-0.13 ppm), MH+: 2719.27298 Da, RT: 89.5883 min,

Identified with: Sequest HT (v1.17); XCorr:4.73, Percolator q-Value:0.0e0, Percolator PEP:5.0e-9, Ions matched by search engine: 0/0

Fragment match tolerance used for search: 0.06 Da

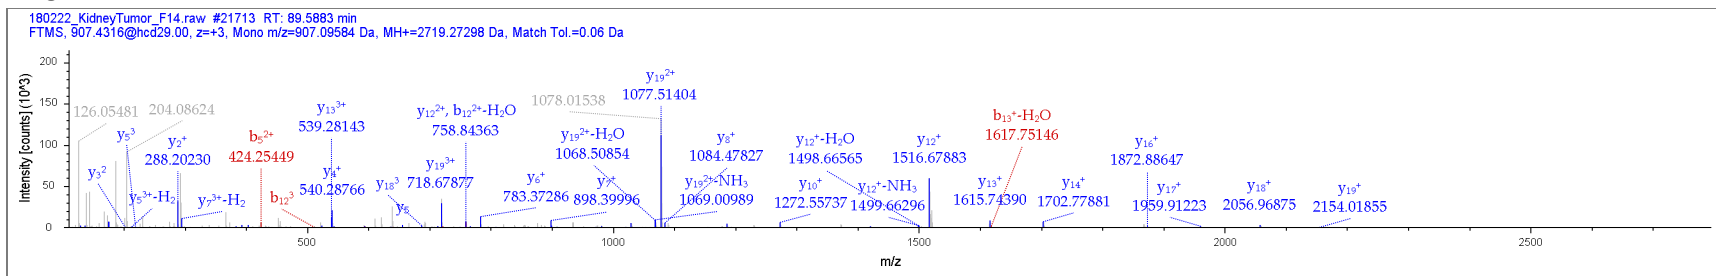

Sequence: TVPPLQPFVGR, T1-Hex(1)HexNAc(1) (365.13220 Da)

Charge: +3, Monoisotopic m/z: 525.94700 Da (-0.01 mmu/-0.02 ppm), MH+: 1575.82643 Da, RT: 74.2783 min,

Identified with: Sequest HT (v1.17); XCorr:2.79, Percolator q-Value:0.0e0, Percolator PEP:5.4e-3, Ions matched by search engine: 0/0

Fragment match tolerance used for search: 0.06 Da

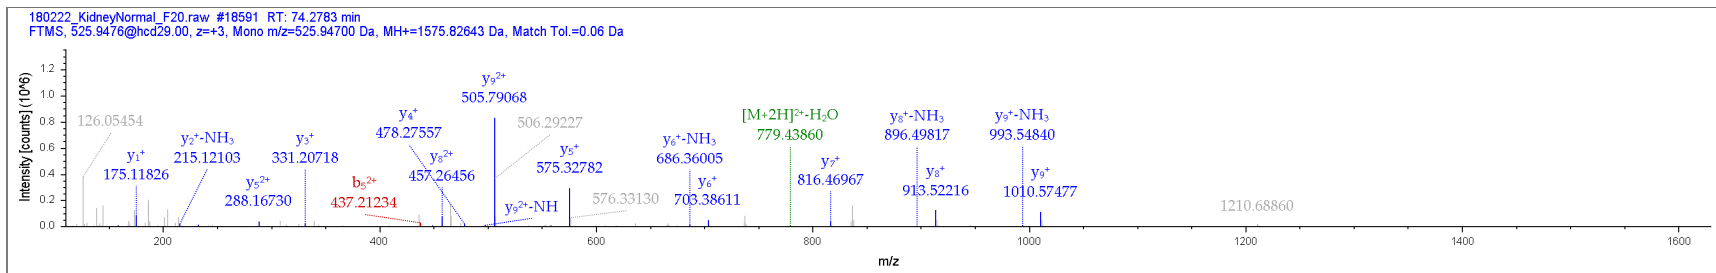

Sequence: TVPFHEEFESGTAK, K14-GuanidinyI (42.02180 Da), T1-Hex(1)HexNAc(1) (365.13220 Da)

Charge: +3, Monoisotopic m/z: 662.63883 Da (+1.5 mmu/+2.26 ppm), MH+: 1985.90194 Da, RT: 60.6562 min,

Identified with: Sequest HT (v1.17); XCorr:3.32, Percolator q-Value:5.0e-5, Percolator PEP:3.5e-3, Ions matched by search engine: 0/0

Fragment match tolerance used for search: 0.06 Da

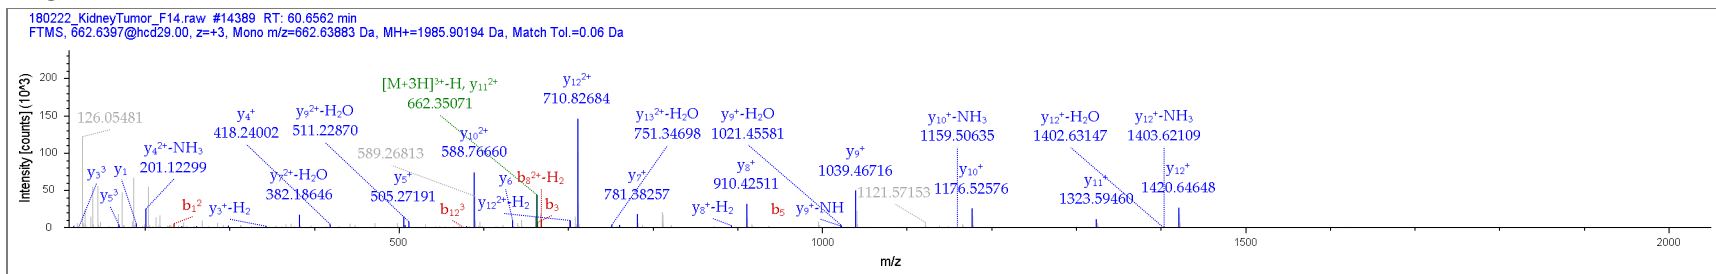



Sequence: TVPEGQFDHFLVQYK, T1-HexNAc (203.07937 Da), K15-Guanidinyl (42.02180 Da)

Charge: +3, Monoisotopic m/z: 685.00578 Da (+0.08 mmu/+0.12 ppm), MH+: 2053.00278 Da, RT: 86.6504 min,

Identified with: Sequest HT (v1.17); XCorr:4.11, Percolator q-Value:0.0e0, Percolator PEP:8.6e-5, Ions matched by search engine: 0/0

Fragment match tolerance used for search: 0.06 Da

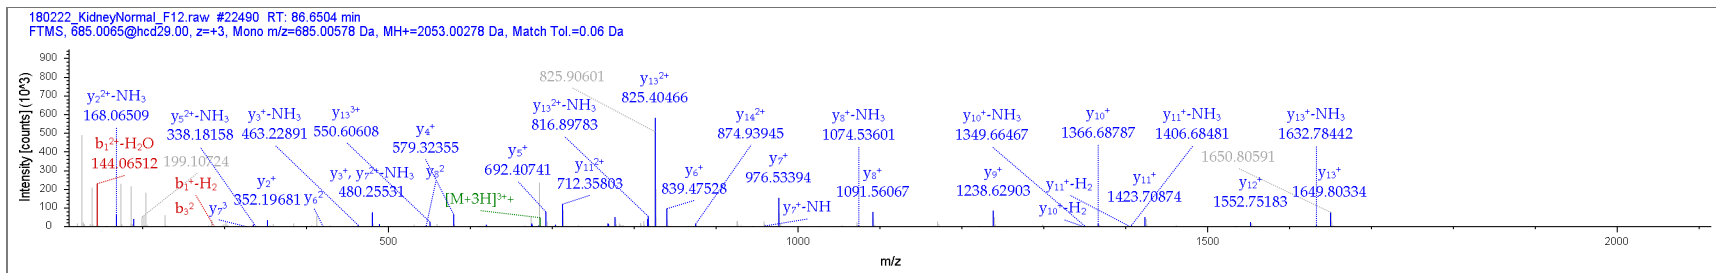

Sequence: TVMPILSSGMECLTR, C12-Carbamidomethyl (57.02146 Da), T1-Hex(1)HexNAc(1) (365.13220 Da)

Charge: +3, Monoisotopic m/z: 687.32547 Da (+0.75 mmu/+1.09 ppm), MH+: 2059.96185 Da, RT: 94.4202 min,

Identified with: Sequest HT (v1.17); XCorr:4.05, Percolator q-Value:0.0e0, Percolator PEP:8.2e-5, Ions matched by search engine: 0/0

Fragment match tolerance used for search: 0.06 Da

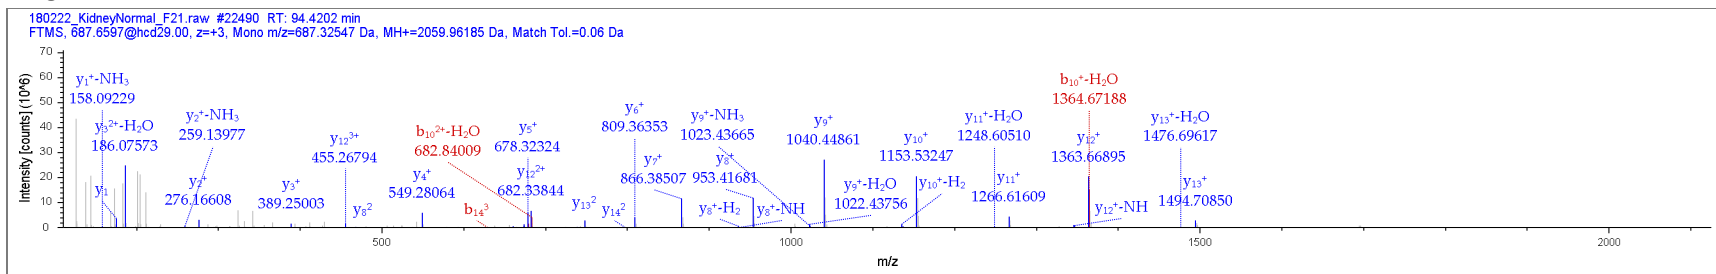

Sequence: TVAPPMVRP, M6-Oxidation (15.99492 Da), T1-HexNAc (203.07937 Da)

Charge: +3, Monoisotopic m/z: 396.20948 Da (+0.08 mmu/+0.21 ppm), MH+: 1186.61389 Da, RT: 42.9222 min,

Identified with: Sequest HT (v1.17); XCorr:2.20, Percolator q-Value:1.7e-4, Percolator PEP:1.1e-2, Ions matched by search engine: 0/0

Fragment match tolerance used for search: 0.06 Da

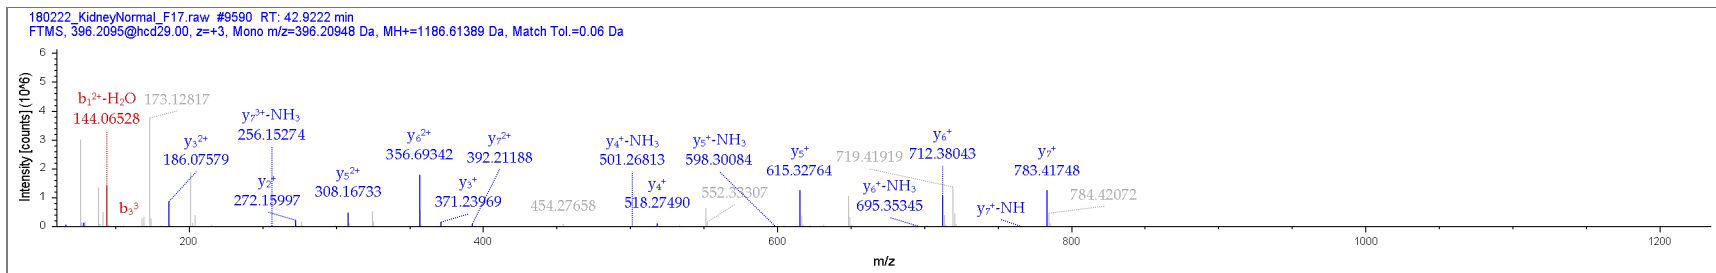

Sequence: TVAPPMVRP, M6-Oxidation (15.99492 Da), T1-Hex(1)HexNAc(1) (365.13220 Da)

Charge: +2, Monoisotopic m/z: 674.83835 Da (+1.48 mmu/+2.2 ppm), MH+: 1348.66942 Da, RT: 43.6263 min,

Identified with: Sequest HT (v1.17); XCorr:1.53, Percolator q-Value:2.9e-4, Percolator PEP:2.0e-2, Ions matched by search engine: 0/0

Fragment match tolerance used for search: 0.06 Da

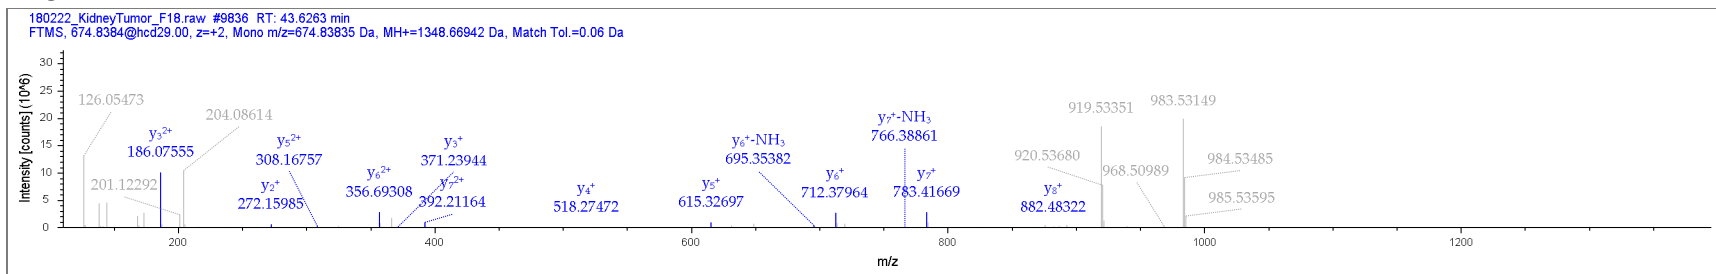

Sequence: TVAPPMVRP, M6-Oxidation (15.99492 Da), T1-HexNAc (203.07937 Da)

Charge: +3, Monoisotopic m/z: 396.20887 Da (-0.53 mmu/-1.34 ppm), MH+: 1186.61204 Da, RT: 48.4719 min,

Identified with: Sequest HT (v1.17); XCorr:2.42, Percolator q-Value:4.9e-4, Percolator PEP:4.0e-2, Ions matched by search engine: 0/0

Fragment match tolerance used for search: 0.06 Da

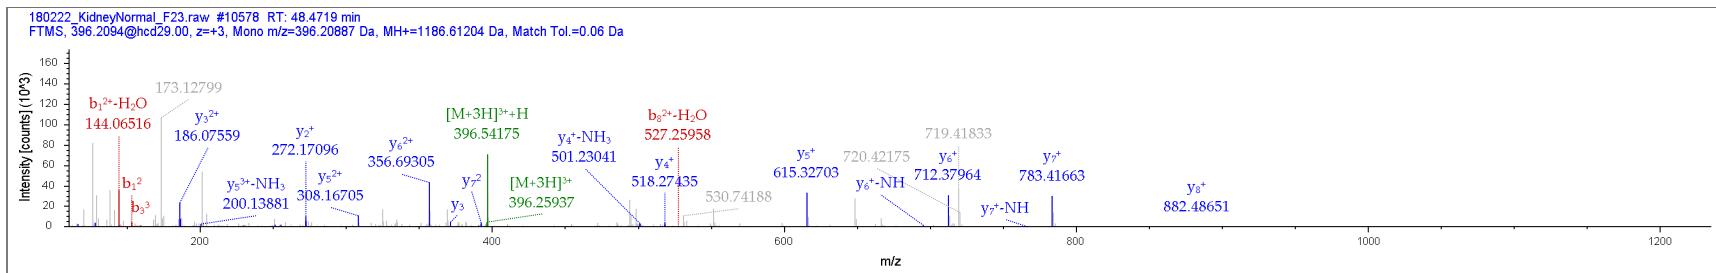

Sequence: TVAPPIHQGPVPTAVIPLPPGTHLLFAQTGK, T14-HexNAc (203.07937 Da), K32-GuanidinyI (42.02180 Da), T1-Hex(1)HexNAc(1) (365.13220 Da)

Charge: +5, Monoisotopic m/z: 768.01596 Da (+0.53 mmu/+0.69 ppm), MH+: 3836.05069 Da, RT: 102.3925 min,

Identified with: Sequest HT (v1.17); XCorr:3.26, Percolator q-Value:6.9e-3, Percolator PEP:1.4e-1, Ions matched by search engine: 0/0

Fragment match tolerance used for search: 0.06 Da

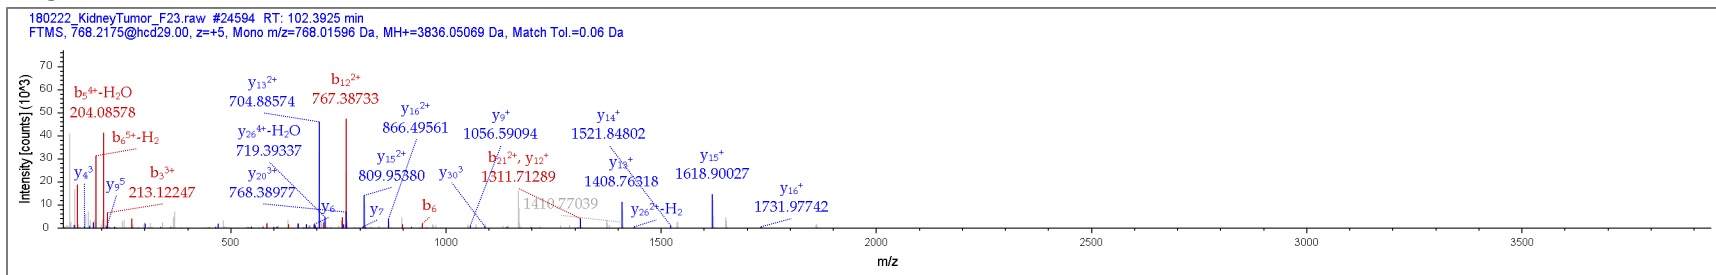

Sequence: TVAPDNTAIPSLR, T1-Hex(1)HexNAc(1) (365.13220 Da)

Charge: +3, Monoisotopic m/z: 573.95953 Da (-0.22 mmu/-0.39 ppm), MH+: 1719.86403 Da, RT: 60.1894 min,

Identified with: Sequest HT (v1.17); XCorr:3.76, Percolator q-Value:1.4e-4, Percolator PEP:1.2e-2, Ions matched by search engine: 0/0

Fragment match tolerance used for search: 0.06 Da

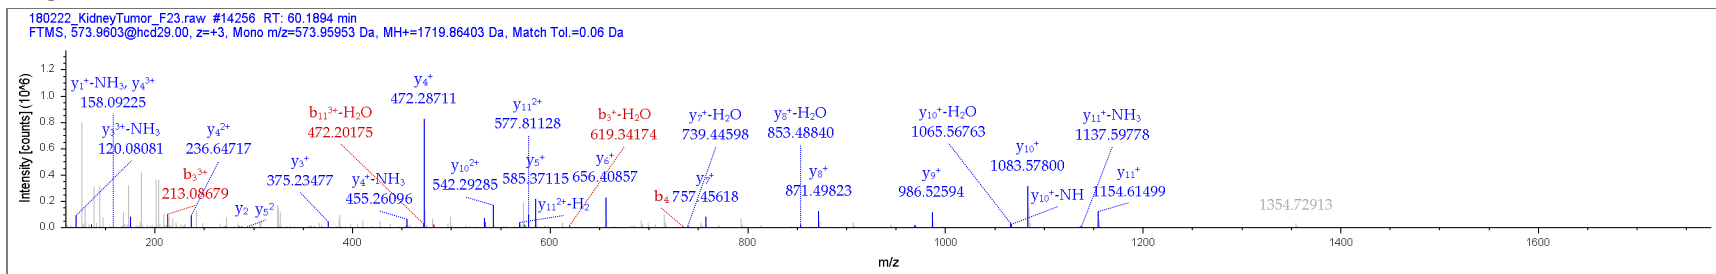

Sequence: TVAPAEDETLQNEADNQENVLSQLLDYDK, K30-GuanidinyI (42.02180 Da), T9-Hex(1)HexNAc(1) (365.13220 Da)

Charge: +3, Monoisotopic m/z: 1242.90406 Da (-0.4 mmu/-0.32 ppm), MH+: 3726.69761 Da, RT: 115.9834 min,

Identified with: Sequest HT (v1.17); XCorr:1.84, Percolator q-Value:5.0e-5, Percolator PEP:2.5e-3, Ions matched by search engine: 0/0

Fragment match tolerance used for search: 0.06 Da

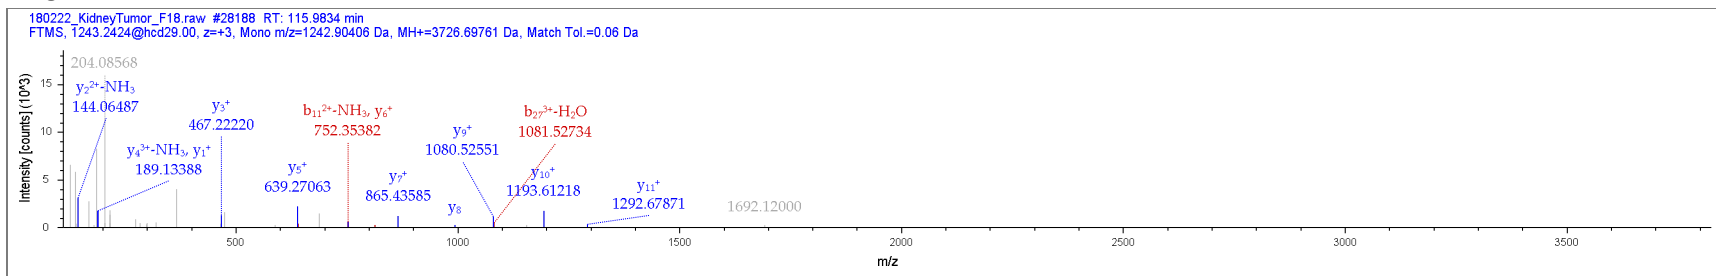

Sequence: TVAHESNWAK, T1-HexNAc (203.07937 Da), K10-Guanidinyl (42.02180 Da)

Charge: +3, Monoisotopic m/z: 463.22434 Da (-0.54 mmu/-1.16 ppm), MH+: 1387.65846 Da, RT: 29.6670 min,

Identified with: Sequest HT (v1.17); XCorr:3.20, Percolator q-Value:9.2e-5, Percolator PEP:9.0e-3, Ions matched by search engine: 0/0

Fragment match tolerance used for search: 0.06 Da

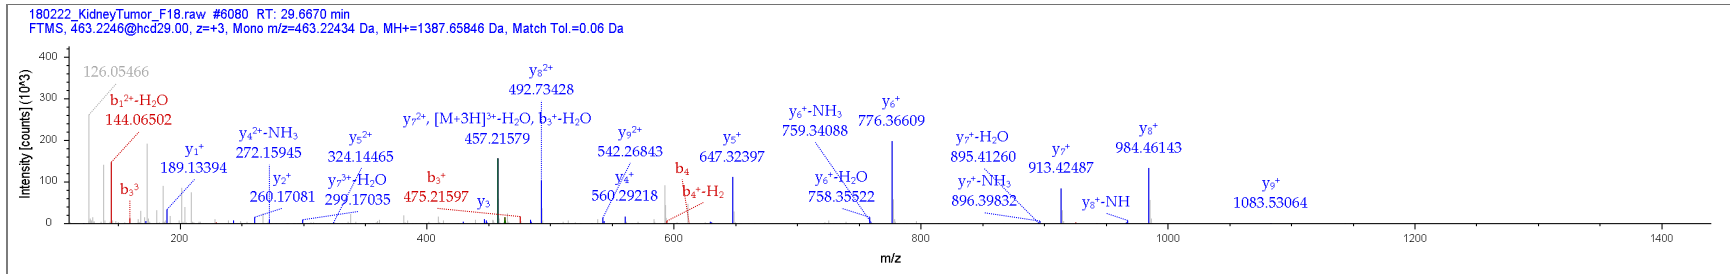

Sequence: TVAHESNWAK, T1-HexNAc (203.07937 Da), K10-Guanidinyl (42.02180 Da)

Charge: +3, Monoisotopic m/z: 463.22438 Da (-0.49 mmu/-1.06 ppm), MH+: 1387.65860 Da, RT: 30.4268 min,

Identified with: Sequest HT (v1.17); XCorr:3.35, Percolator q-Value:2.2e-4, Percolator PEP:1.2e-2, Ions matched by search engine: 0/0

Fragment match tolerance used for search: 0.06 Da

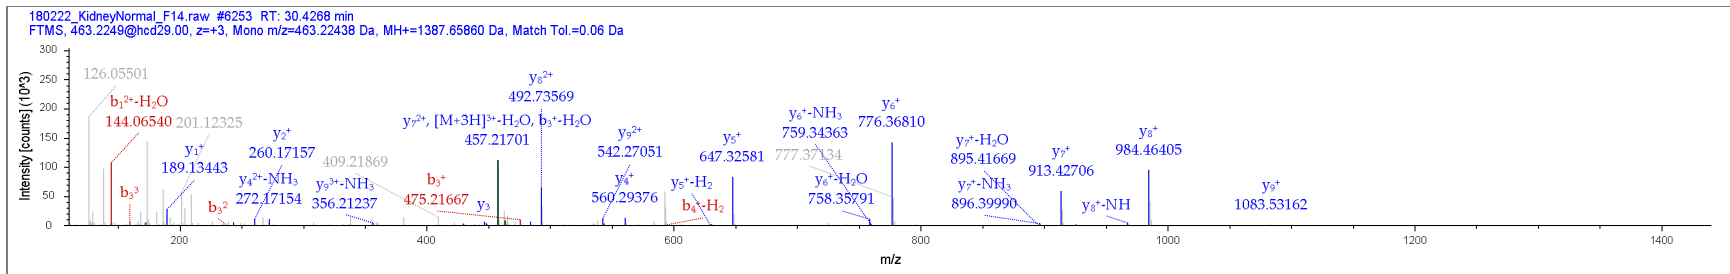

Sequence: TTVPPSGLSVPFSTWDQDHLR, T2-Hex(1)HexNAc(1) (365.13220 Da)

Charge: +3, Monoisotopic m/z: 940.77955 Da (+1.03 mmu/+1.09 ppm), MH+: 2820.32410 Da, RT: 91.2756 min,

Identified with: Sequest HT (v1.17); XCorr:4.88, Percolator q-Value:0.0e0, Percolator PEP:8.2e-9, Ions matched by search engine: 0/0

Fragment match tolerance used for search: 0.06 Da

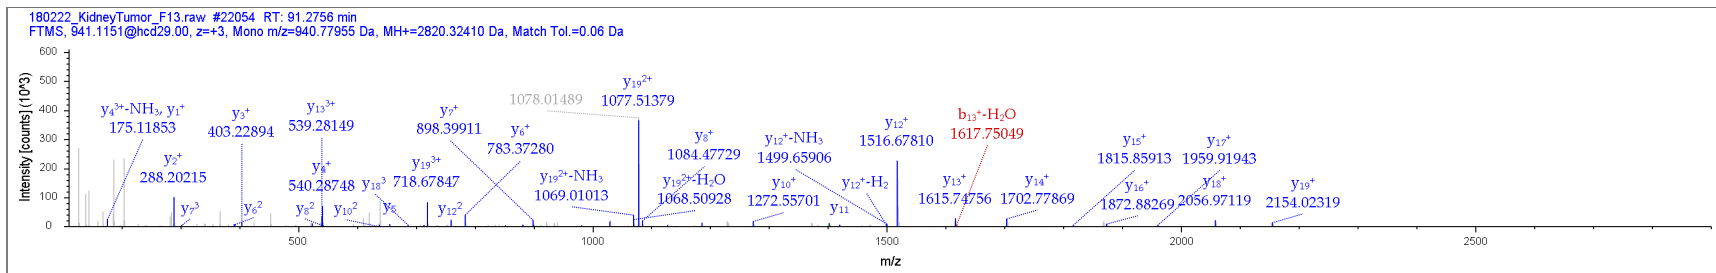

Sequence: TTVPPSGLSVPFSTWDQDHLR, T2-Hex(1)HexNAc(1) (365.13220 Da)

Charge: +3, Monoisotopic m/z: 940.77949 Da (+0.97 mmu/+1.03 ppm), MH+: 2820.32392 Da, RT: 91.0300 min,

Identified with: Sequest HT (v1.17); XCorr:5.35, Percolator q-Value:0.0e0, Percolator PEP:3.4e-8, Ions matched by search engine: 0/0

Fragment match tolerance used for search: 0.06 Da

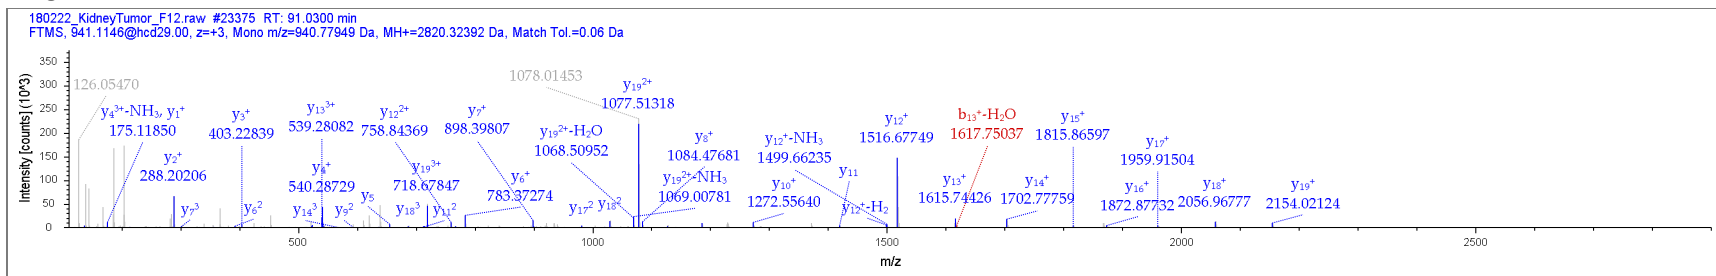

Sequence: TTVPPSGLSVPFSTWDQDHLR, T2-Hex(1)HexNAc(1) (365.13220 Da)

Charge: +3, Monoisotopic m/z: 940.77968 Da (+1.15 mmu/+1.22 ppm), MH+: 2820.32447 Da, RT: 90.7326 min,

Identified with: Sequest HT (v1.17); XCorr:5.61, Percolator q-Value:0.0e0, Percolator PEP:2.1e-8, Ions matched by search engine: 0/0

Fragment match tolerance used for search: 0.06 Da

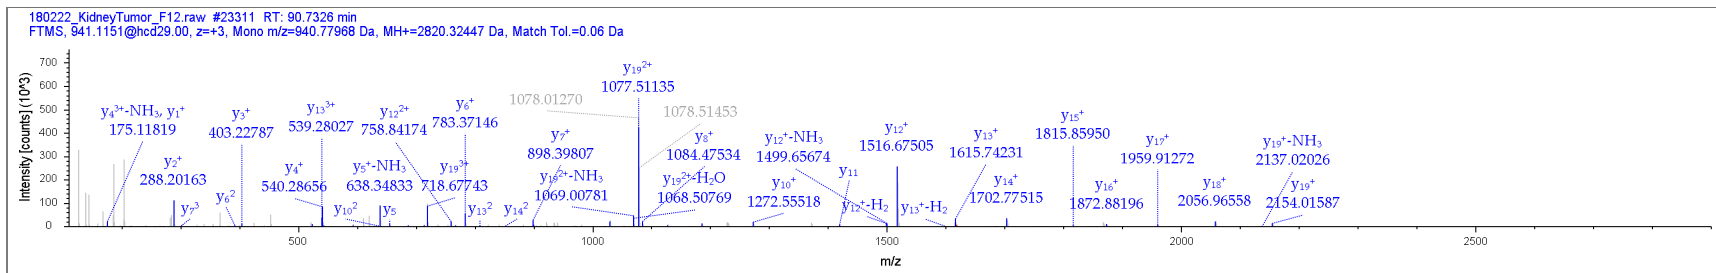

Sequence: TTVASLGAQ, T1-HexNAc (203.07937 Da), T2-Hex(1)HexNAc(1) (365.13220 Da)

Charge: +3, Monoisotopic m/z: 472.55928 Da (-0.09 mmu/-0.18 ppm), MH+: 1415.66328 Da, RT: 27.1167 min,

Identified with: Sequest HT (v1.17); XCorr:1.74, Percolator q-Value:6.1e-4, Percolator PEP:4.5e-2, Ions matched by search engine: 0/0

Fragment match tolerance used for search: 0.06 Da

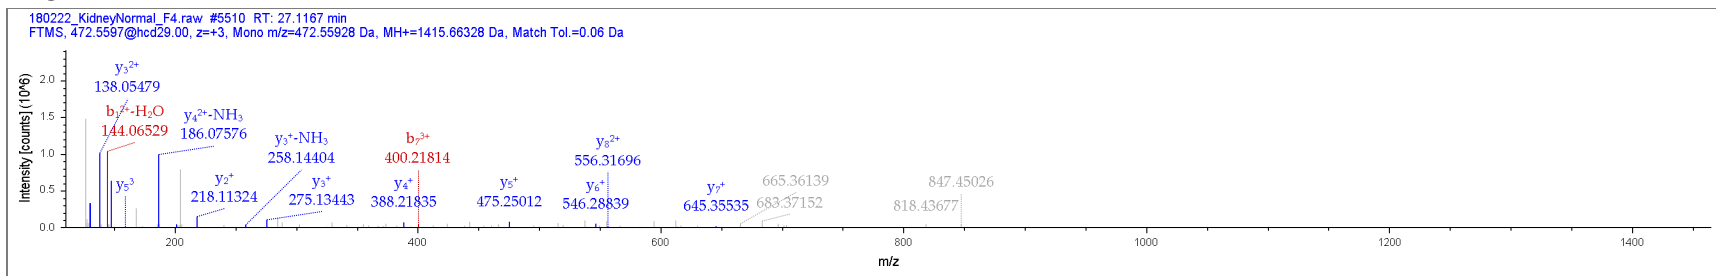

Sequence: TTTTSAGAEAAEGQFDR, T1-Hex(1)HexNAc(1) (365.13220 Da)

Charge: +3, Monoisotopic m/z: 693.30562 Da (-0.7 mmu/-1 ppm), MH+: 2077.90230 Da, RT: 48.5495 min,

Identified with: Sequest HT (v1.17); XCorr:5.16, Percolator q-Value:0.0e0, Percolator PEP:8.7e-4, Ions matched by search engine: 0/0

Fragment match tolerance used for search: 0.06 Da

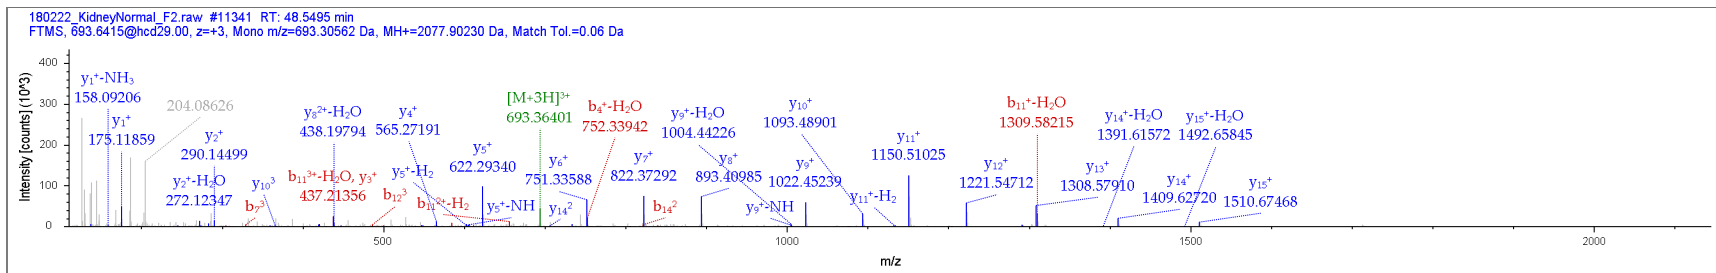

Sequence: TTTLLETVFHHV, T1-Hex(1)HexNAc(1) (365.13220 Da), T2-Hex(1)HexNAc(1) (365.13220 Da)

Charge: +3, Monoisotopic m/z: 710.00770 Da (+0.61 mmu/+0.86 ppm), MH+: 2128.00856 Da, RT: 95.1356 min,

Identified with: Sequest HT (v1.17); XCorr:2.68, Percolator q-Value:0.0e0, Percolator PEP:2.6e-3, Ions matched by search engine: 0/0

Fragment match tolerance used for search: 0.06 Da

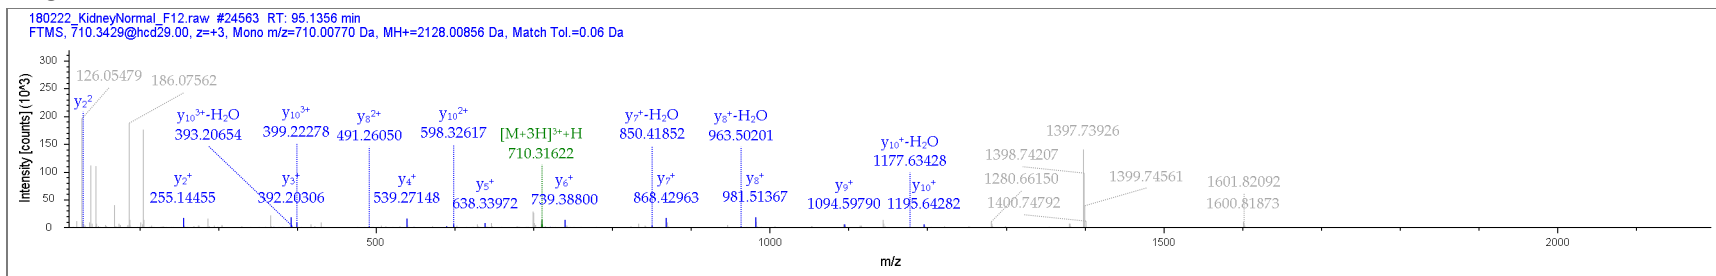



Sequence: TTTIAEPDPGMSGWPDGR, M11-Oxidation (15.99492 Da), T1-Hex(1)HexNAc(1) (365.13220 Da), T2-Hex(1)HexNAc(1) (365.13220 Da), T3-Hex(1)HexNAc(1) (365.13220 Da)

Charge: +4, Monoisotopic m/z: 750.56700 Da (+0.13 mmu/+0.17 ppm), MH+: 2999.24616 Da, RT: 54.4181 min,

Identified with: Sequest HT (v1.17); XCorr:4.00, Percolator q-Value:0.0e0, Percolator PEP:7.6e-6, Ions matched by search engine: 0/0

Fragment match tolerance used for search: 0.06 Da

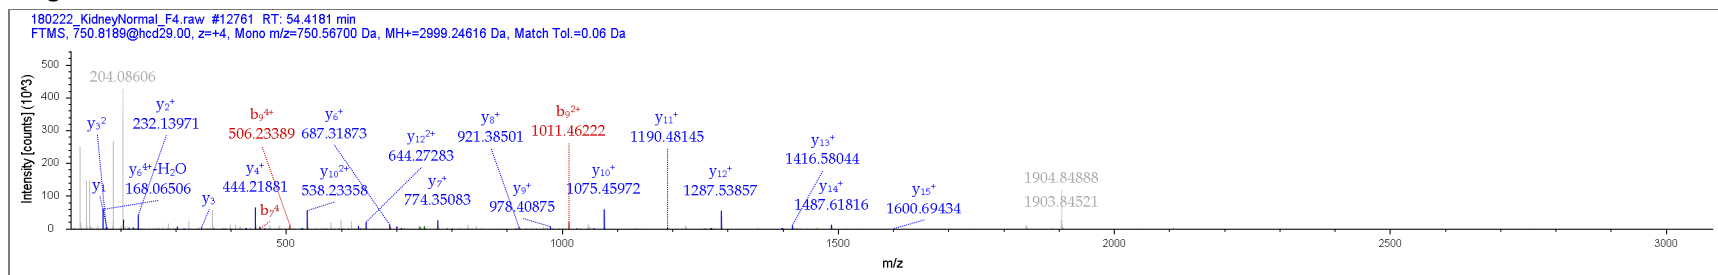

Sequence: TTSSGSGPFTDVR, T2-HexNAc (203.07937 Da), T1-Hex(1)HexNAc(1) (365.13220 Da)

Charge: +3, Monoisotopic m/z: 627.28210 Da (+0.88 mmu/+1.4 ppm), MH+: 1879.83174 Da, RT: 47.6298 min,

Identified with: Sequest HT (v1.17); XCorr:3.55, Percolator q-Value:0.0e0, Percolator PEP:5.4e-4, Ions matched by search engine: 0/0

Fragment match tolerance used for search: 0.06 Da

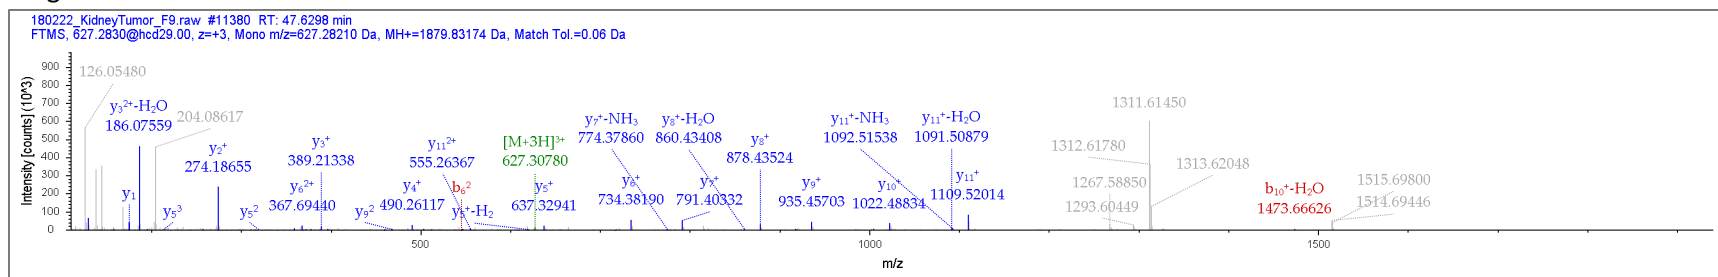

Sequence: TTSSGSGPFTDVR, T2-HexNAc (203.07937 Da), T1-Hex(1)HexNAc(1) (365.13220 Da)

Charge: +3, Monoisotopic m/z: 627.28210 Da (+0.88 mmu/+1.4 ppm), MH+: 1879.83174 Da, RT: 47.6298 min,

Identified with: Sequest HT (v1.17); XCorr:3.55, Percolator q-Value:0.0e0, Percolator PEP:5.4e-4, Ions matched by search engine: 0/0

Fragment match tolerance used for search: 0.06 Da

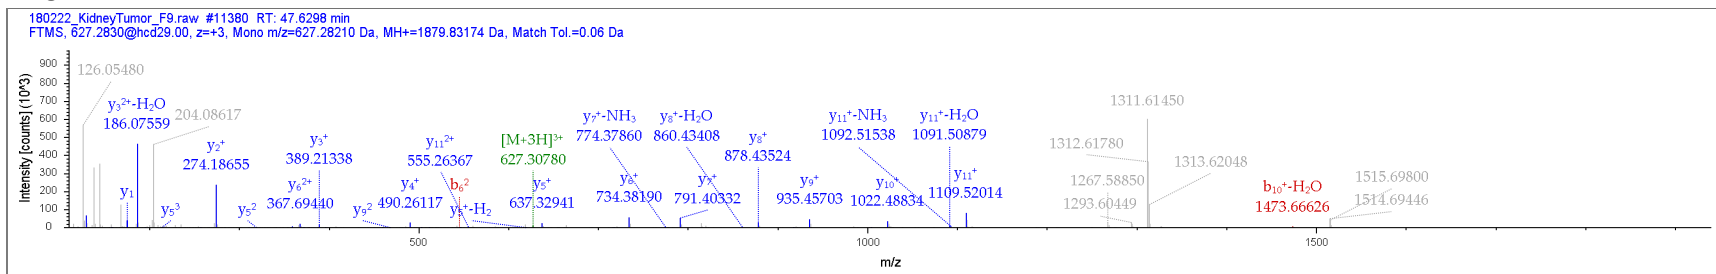

Sequence: TTQTPAPIQAPSAILPLPGQSVER, T4-Hex(1)HexNAc(1) (365.13220 Da)

Charge: +3, Monoisotopic m/z: 946.49960 Da (+2.13 mmu/+2.26 ppm), MH+: 2837.48426 Da, RT: 95.9239 min,

Identified with: Sequest HT (v1.17); XCorr:4.32, Percolator q-Value:0.0e0, Percolator PEP:2.0e-6, Ions matched by search engine: 0/0

Fragment match tolerance used for search: 0.06 Da

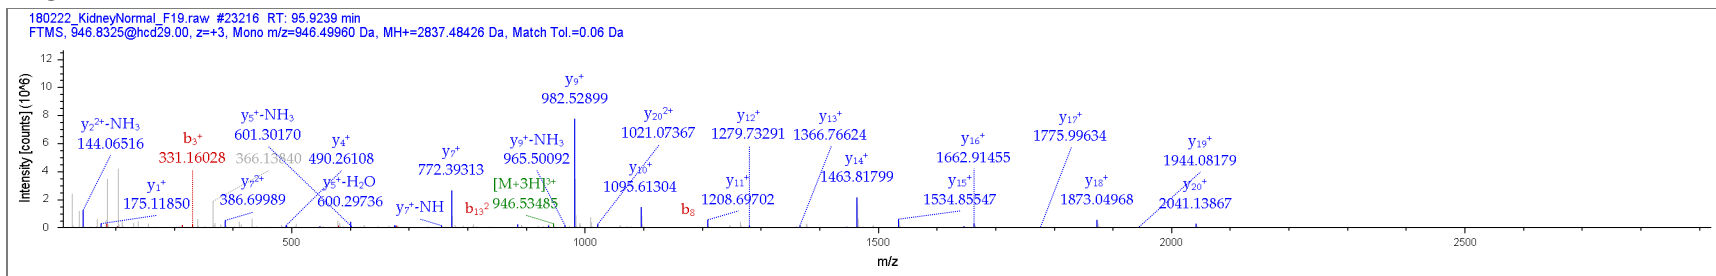

Sequence: TQAPTAQEAGEGPGSILELSGAH, T1-Hex(1)HexNAc(1) (365.13220 Da)

Charge: +3, Monoisotopic m/z: 862.74046 Da (+0.5 mmu/+0.58 ppm), MH+: 2586.20682 Da, RT: 79.0750 min,

Identified with: Sequest HT (v1.17); XCorr:7.16, Percolator q-Value:0.0e0, Percolator PEP:3.7e-7, Ions matched by search engine: 0/0

Fragment match tolerance used for search: 0.06 Da

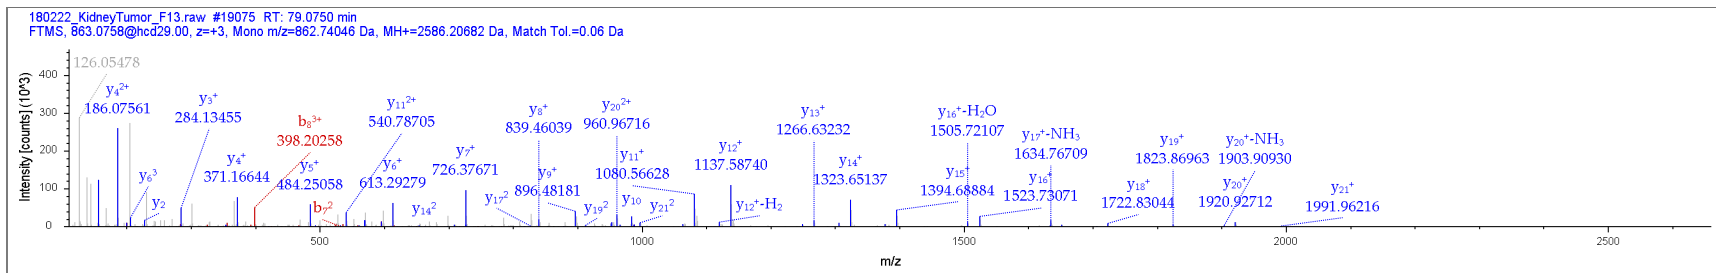

Sequence: TQAFGEWPWGQELGSR, T1-Hex(1)HexNAc(1) (365.13220 Da)

Charge: +3, Monoisotopic m/z: 738.67139 Da (+0.35 mmu/+0.48 ppm), MH+: 2213.99963 Da, RT: 98.9432 min,

Identified with: Sequest HT (v1.17); XCorr:3.64, Percolator q-Value:0.0e0, Percolator PEP:1.3e-4, Ions matched by search engine: 0/0

Fragment match tolerance used for search: 0.06 Da

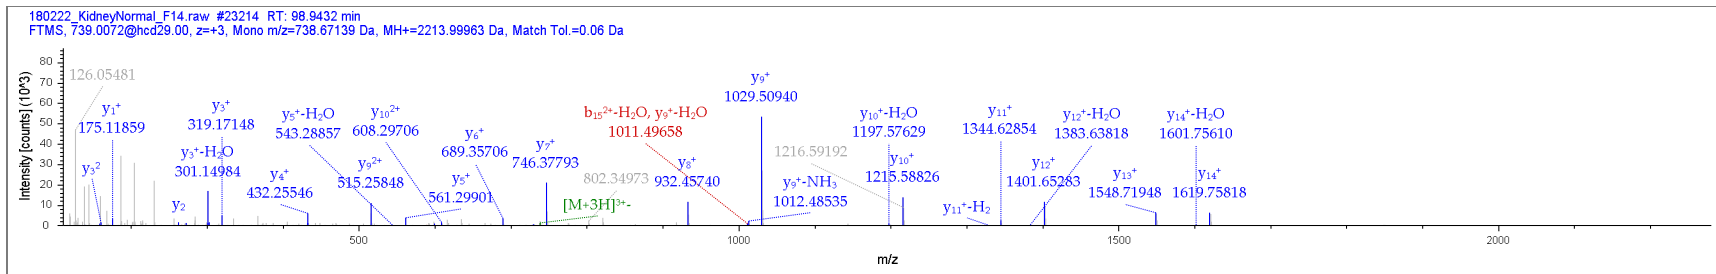

Sequence: TPVVQDCYHGDGQSYR, C7-Carbamidomethyl (57.02146 Da), T1-Hex(1)HexNAc(1) (365.13220 Da)

Charge: +3, Monoisotopic m/z: 749.65603 Da (+0.97 mmu/+1.29 ppm), MH+: 2246.95354 Da, RT: 39.3221 min,

Identified with: Sequest HT (v1.17); XCorr:4.79, Percolator q-Value:0.0e0, Percolator PEP:3.2e-5, Ions matched by search engine: 0/0

Fragment match tolerance used for search: 0.06 Da

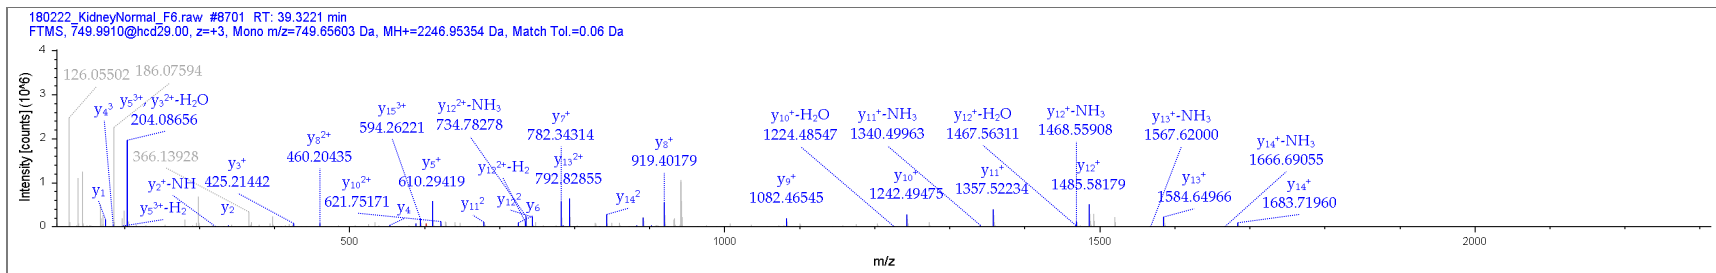

Sequence: TPVVDPDAPPSPPLGAPGLPPAGSPPD, S24-Hex(1)HexNAc(1) (365.13220 Da)

Charge: +3, Monoisotopic m/z: 960.80667 Da (+0.59 mmu/+0.61 ppm), MH+: 2880.40546 Da, RT: 91.4434 min,

Identified with: Sequest HT (v1.17); XCorr:3.67, Percolator q-Value:4.3e-3, Percolator PEP:1.4e-1, Ions matched by search engine: 0/0

Fragment match tolerance used for search: 0.06 Da

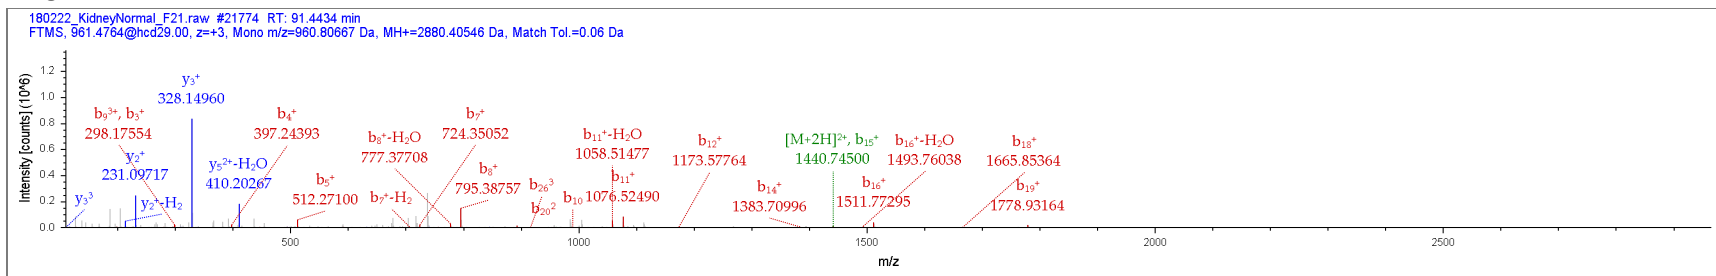

Sequence: TPVSAECPVVNELER, C7-Carbamidomethyl (57.02146 Da), T1-Hex(1)HexNAc(1) (365.13220 Da)

Charge: +3, Monoisotopic m/z: 688.99344 Da (+0.54 mmu/+0.78 ppm), MH+: 2064.96576 Da, RT: 68.9553 min,

Identified with: Sequest HT (v1.17); XCorr:3.51, Percolator q-Value:0.0e0, Percolator PEP:2.8e-4, Ions matched by search engine: 0/0

Fragment match tolerance used for search: 0.06 Da

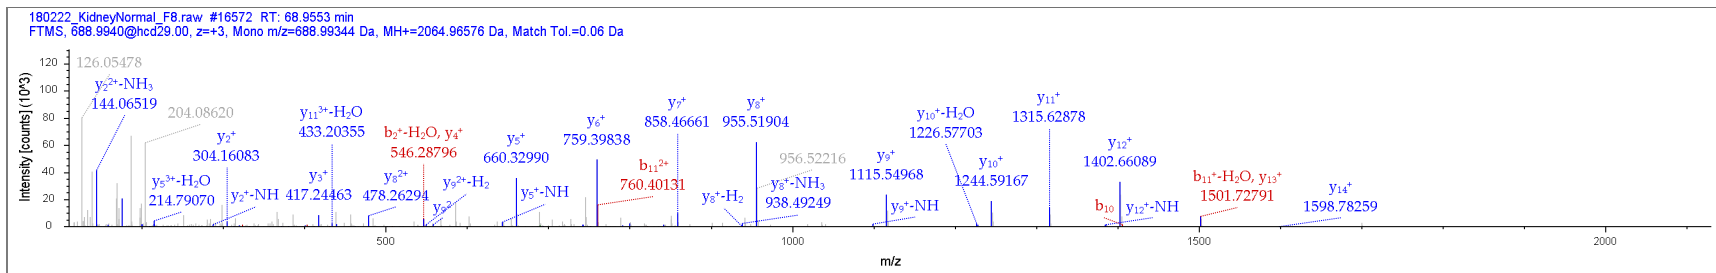

Sequence: TEPPTPPPPPTIPPAR, T5-HexNAc (203.07937 Da), T11-HexNAc (203.07937 Da), T1-Hex(1)HexNAc(1) (365.13220 Da)

Charge: +3, Monoisotopic m/z: 812.73643 Da (+1.05 mmu/+1.3 ppm), MH+: 2436.19473 Da, RT: 62.1815 min,

Identified with: Sequest HT (v1.17); XCorr:2.65, Percolator q-Value:2.5e-4, Percolator PEP:1.9e-2, Ions matched by search engine: 0/0

Fragment match tolerance used for search: 0.06 Da

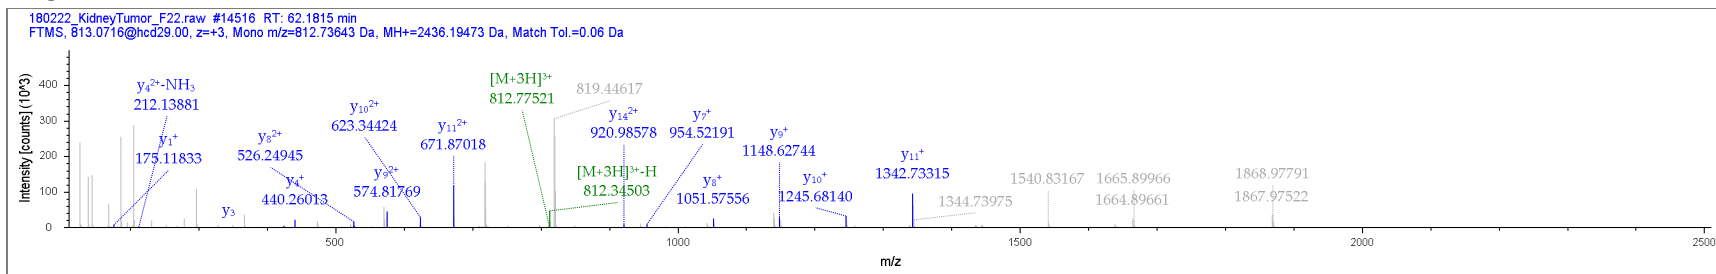

Sequence: TEHSSIHQPGVQGLT, T16-Hex(1)HexNAc(1) (365.13220 Da)

Charge: +3, Monoisotopic m/z: 695.65872 Da (-0.08 mmu/-0.11 ppm), MH+: 2084.96162 Da, RT: 44.5535 min,

Identified with: Sequest HT (v1.17); XCorr:4.57, Percolator q-Value:1.5e-3, Percolator PEP:4.7e-2, Ions matched by search engine: 0/0

Fragment match tolerance used for search: 0.06 Da

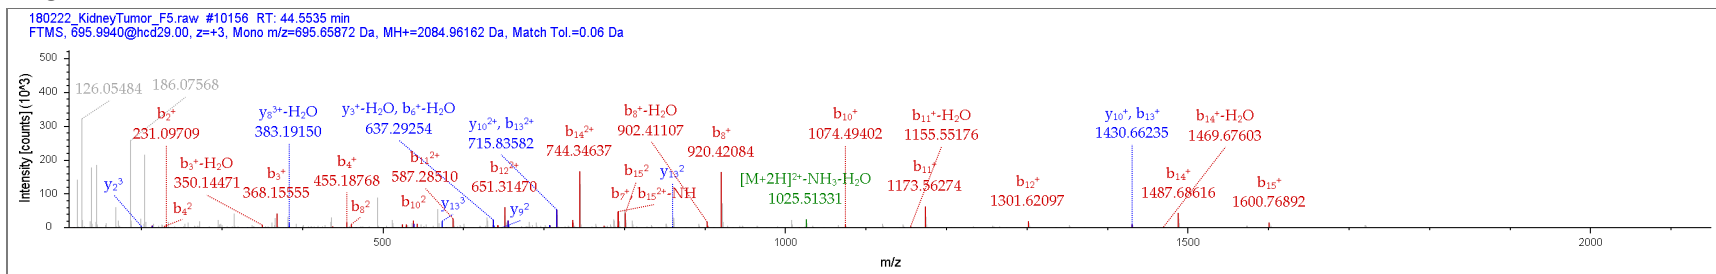

Sequence: TAAAALGPPAPVQAK, K15-GuanidinyI (42.02180 Da), T1-Hex(1)HexNAc(1) (365.13220 Da)

Charge: +2, Monoisotopic m/z: 885.46847 Da (+0.85 mmu/+0.96 ppm), MH+: 1769.92967 Da, RT: 53.5714 min,

Identified with: Sequest HT (v1.17); XCorr:2.62, Percolator q-Value:5.0e-5, Percolator PEP:2.7e-3, Ions matched by search engine: 0/0

Fragment match tolerance used for search: 0.06 Da

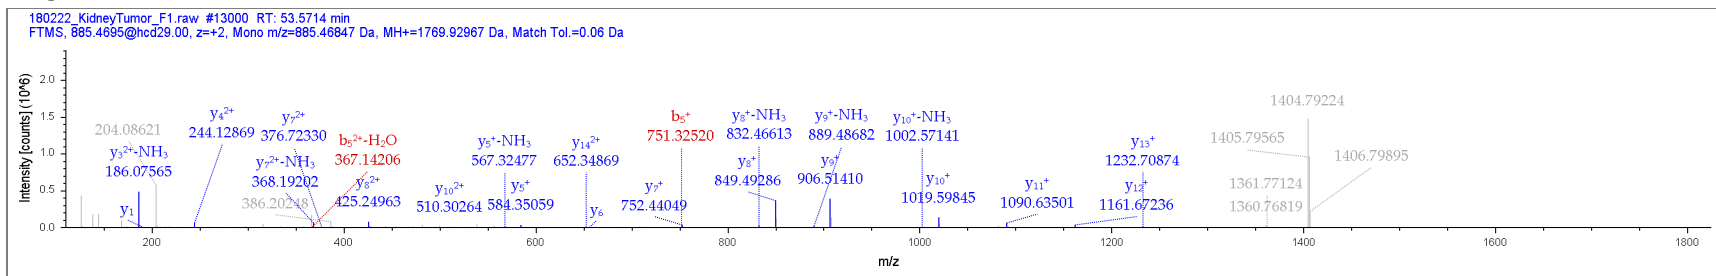

Sequence: SYPQEEATLNEMFR, S1-Hex(1)HexNAc(1) (365.13220 Da)

Charge: +3, Monoisotopic m/z: 693.97423 Da (+0.61 mmu/+0.87 ppm), MH+: 2079.90813 Da, RT: 86.3205 min,

Identified with: Sequest HT (v1.17); XCorr:3.79, Percolator q-Value:0.0e0, Percolator PEP:2.0e-4, Ions matched by search engine: 0/0

Fragment match tolerance used for search: 0.06 Da

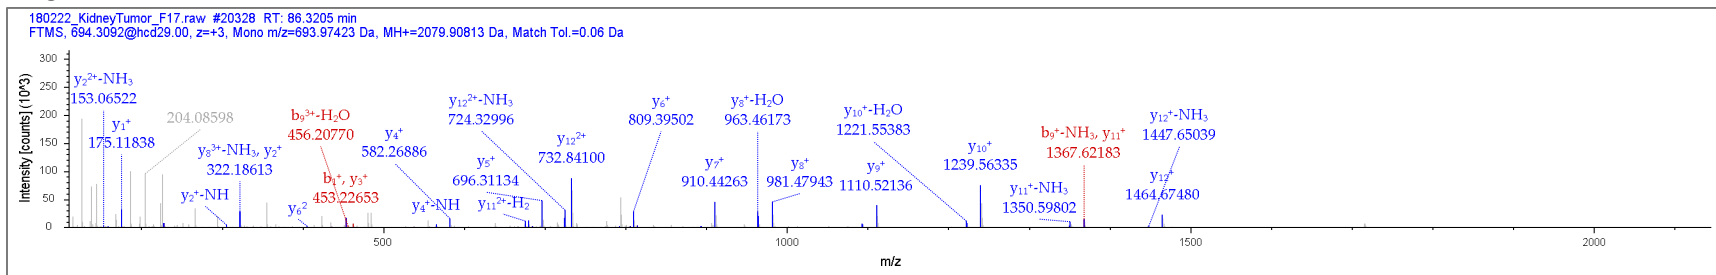

Sequence: SYPQEEATLNEMFR, M12-Oxidation (15.99492 Da), S1-Hex(1)HexNAc(1) (365.13220 Da)

Charge: +3, Monoisotopic m/z: 699.30589 Da (+0.63 mmu/+0.9 ppm), MH+: 2095.90311 Da, RT: 65.9694 min,

Identified with: Sequest HT (v1.17); XCorr:3.83, Percolator q-Value:0.0e0, Percolator PEP:4.2e-4, Ions matched by search engine: 0/0

Fragment match tolerance used for search: 0.06 Da

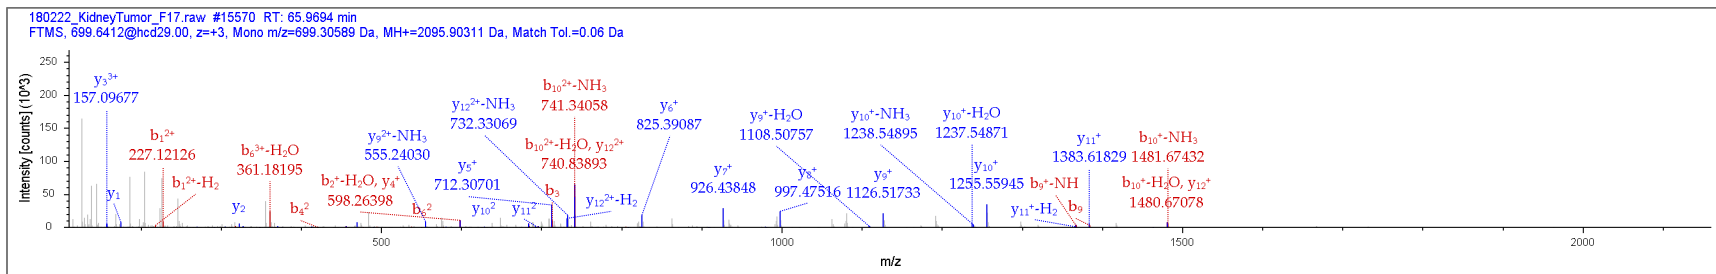

Sequence: SYPASGHTTPLSR, S1-Hex(1)HexNAc(1) (365.13220 Da)

Charge: +3, Monoisotopic m/z: 580.27513 Da (-0.72 mmu/-1.24 ppm), MH+: 1738.81084 Da, RT: 37.0239 min,

Identified with: Sequest HT (v1.17); XCorr:3.39, Percolator q-Value:0.0e0, Percolator PEP:2.4e-4, Ions matched by search engine: 0/0

Fragment match tolerance used for search: 0.06 Da

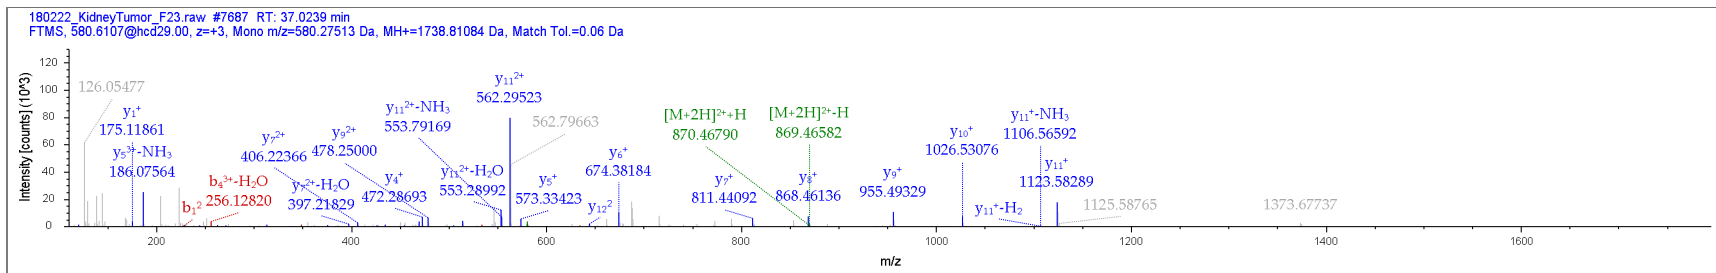

Sequence: SVRPQDAGTYVCTATNR, C12-Carbamidomethyl (57.02146 Da), S1-Hex(1)HexNAc(1) (365.13220 Da)

Charge: +3, Monoisotopic m/z: 754.35019 Da (+0.33 mmu/+0.44 ppm), MH+: 2261.03603 Da, RT: 47.6387 min,

Identified with: Sequest HT (v1.17); XCorr:3.45, Percolator q-Value:0.0e0, Percolator PEP:5.4e-4, Ions matched by search engine: 0/0

Fragment match tolerance used for search: 0.06 Da

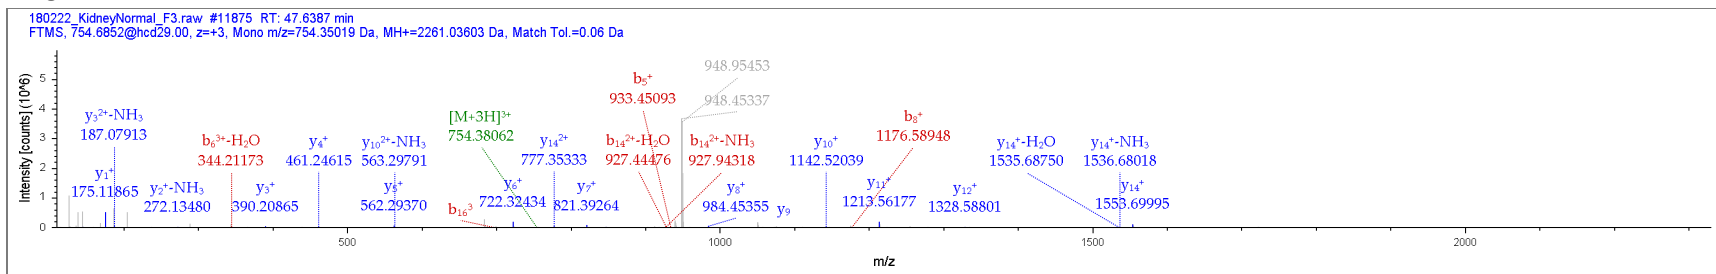



Sequence: SVRPLPCGPQEAACR, C7-Carbamidomethyl (57.02146 Da), C14-Carbamidomethyl (57.02146 Da), S1-Hex(1)HexNAc(1) (365.13220 Da)

Charge: +4, Monoisotopic m/z: 516.49147 Da (-2.3 mmu/-4.45 ppm), MH+: 2062.94404 Da, RT: 43.1550 min,

Identified with: Sequest HT (v1.17); XCorr:2.94, Percolator q-Value:2.5e-4, Percolator PEP:2.0e-2, Ions matched by search engine: 0/0

Fragment match tolerance used for search: 0.06 Da

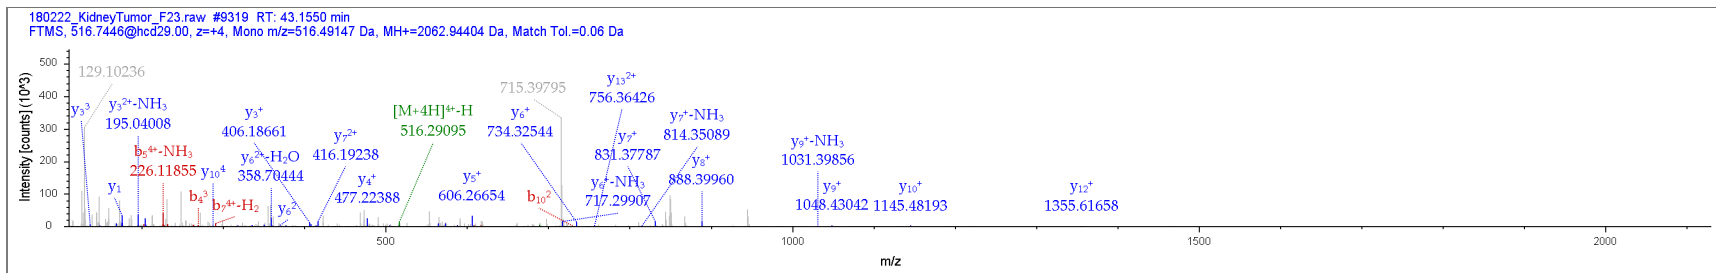

Sequence: SVRPLPCGPQEAACR, C7-Carbamidomethyl (57.02146 Da), C14-Carbamidomethyl (57.02146 Da), S1-Hex(1)HexNAc(1) (365.13220 Da)

Charge: +2, Monoisotopic m/z: 1031.98054 Da (+0.3 mmu/+0.29 ppm), MH+: 2062.95381 Da, RT: 42.5588 min,

Identified with: Sequest HT (v1.17); XCorr:2.14, Percolator q-Value:0.0e0, Percolator PEP:2.1e-3, Ions matched by search engine: 0/0

Fragment match tolerance used for search: 0.06 Da

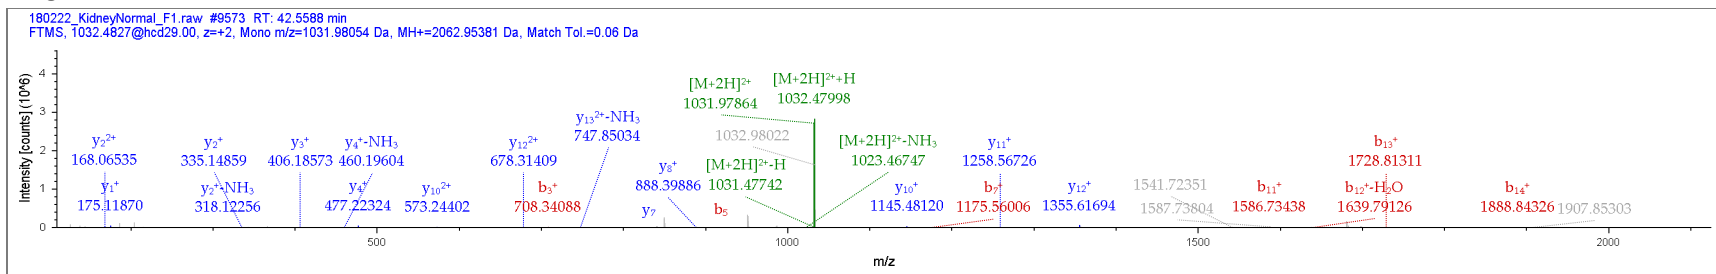

Sequence: SVRPLPCGPQEAACR, C7-Carbamidomethyl (57.02146 Da), C14-Carbamidomethyl (57.02146 Da), S1-HexNAc (203.07937 Da)

Charge: +3, Monoisotopic m/z: 634.30539 Da (+0.41 mmu/+0.64 ppm), MH+: 1900.90161 Da, RT: 44.8190 min,

Identified with: Sequest HT (v1.17); XCorr:3.90, Percolator q-Value:0.0e0, Percolator PEP:5.2e-5, Ions matched by search engine: 0/0

Fragment match tolerance used for search: 0.06 Da

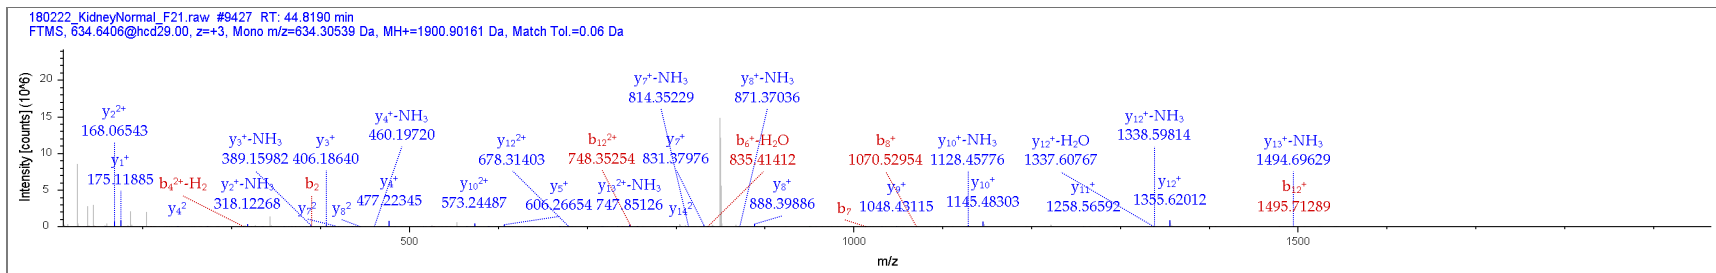

Sequence: SVRPLPCGPQEAACR, C7-Carbamidomethyl (57.02146 Da), C14-Carbamidomethyl (57.02146 Da), S1-HexNAc (203.07937 Da)

Charge: +3, Monoisotopic m/z: 634.30426 Da (-0.72 mmu/-1.14 ppm), MH+: 1900.89823 Da, RT: 43.2919 min,

Identified with: Sequest HT (v1.17); XCorr:3.93, Percolator q-Value:0.0e0, Percolator PEP:8.9e-5, Ions matched by search engine: 0/0

Fragment match tolerance used for search: 0.06 Da

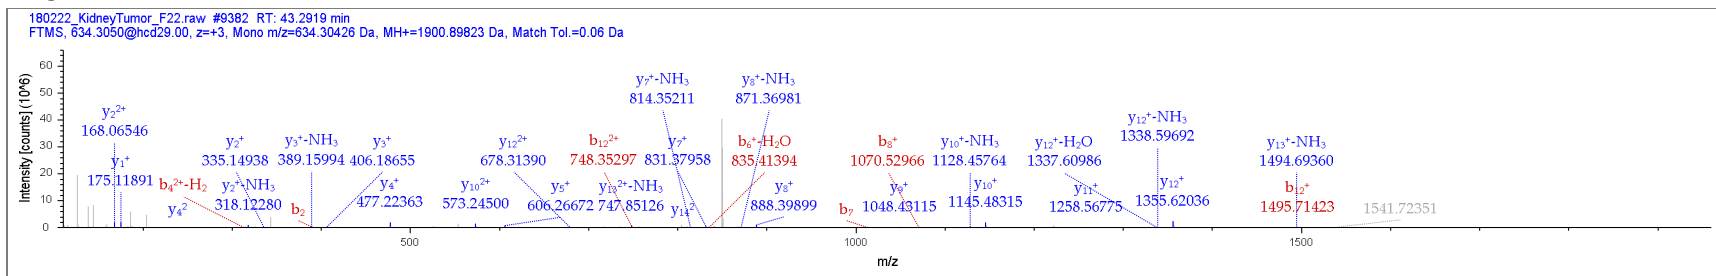

Sequence: SVRPLPCGPQEAACR, C7-Carbamidomethyl (57.02146 Da), C14-Carbamidomethyl (57.02146 Da), S1-Hex(1)HexNAc(1) (365.13220 Da)

Charge: +3, Monoisotopic m/z: 688.32248 Da (-0.11 mmu/-0.16 ppm), MH+: 2062.95289 Da, RT: 43.6830 min,

Identified with: Sequest HT (v1.17); XCorr:2.80, Percolator q-Value:0.0e0, Percolator PEP:2.1e-5, Ions matched by search engine: 0/0

Fragment match tolerance used for search: 0.06 Da

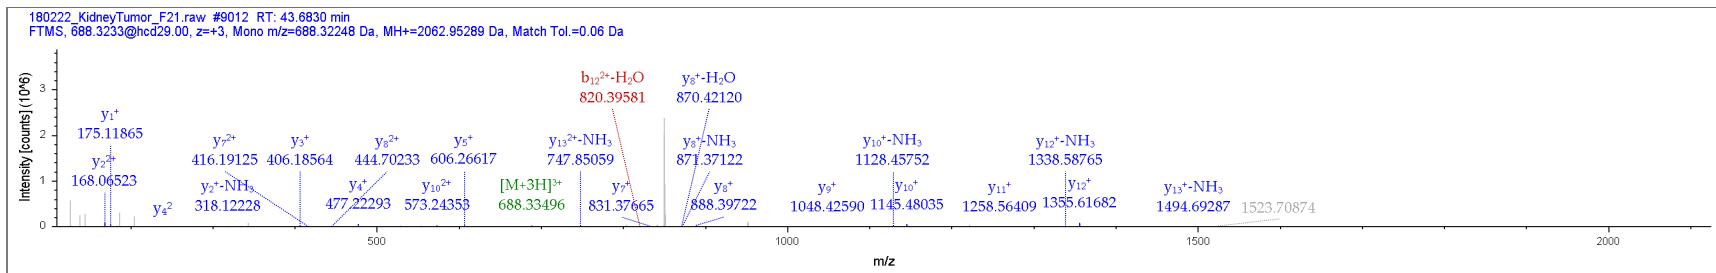

Sequence: SVRPLPCGPQEAACR, C7-Carbamidomethyl (57.02146 Da), C14-Carbamidomethyl (57.02146 Da), S1-HexNAc (203.07937 Da)

Charge: +3, Monoisotopic m/z: 634.30701 Da (+2.03 mmu/+3.2 ppm), MH+: 1900.90647 Da, RT: 41.4657 min,

Identified with: Sequest HT (v1.17); XCorr:4.09, Percolator q-Value:0.0e0, Percolator PEP:7.6e-4, Ions matched by search engine: 0/0

Fragment match tolerance used for search: 0.06 Da

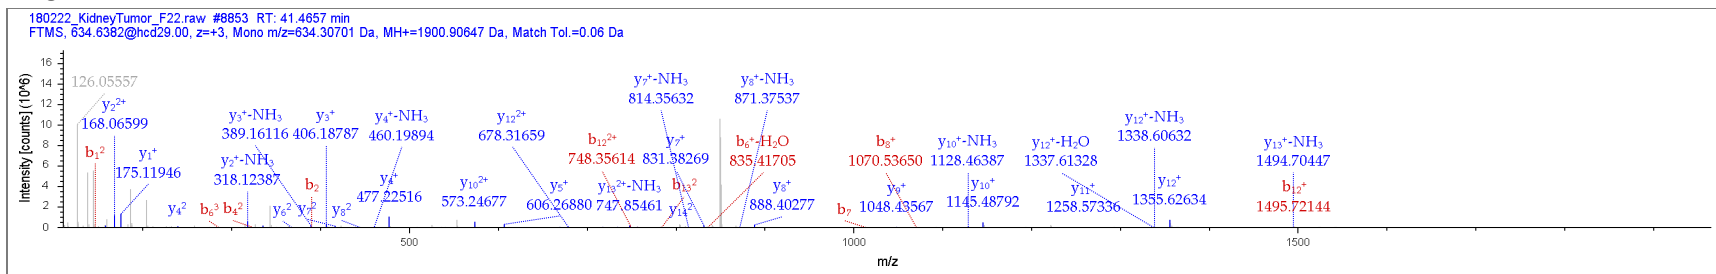

Sequence: SVPSEDEVLGEPDILVIDQTR, S1-Hex(1)HexNAc(1) (365.13220 Da)

Charge: +3, Monoisotopic m/z: 964.46799 Da (+0.08 mmu/+0.08 ppm), MH+: 2891.38941 Da, RT: 93.5451 min,

Identified with: Sequest HT (v1.17); XCorr:4.76, Percolator q-Value:0.0e0, Percolator PEP:2.6e-5, Ions matched by search engine: 0/0

Fragment match tolerance used for search: 0.06 Da

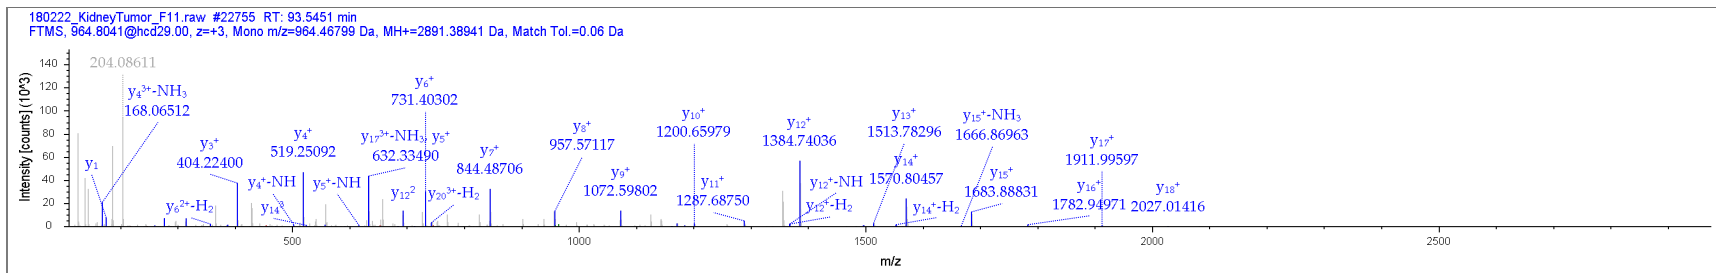

Sequence: SVPPYQHGVSVVEVNCR, C15-Carbamidomethyl (57.02146 Da), S1-Hex(1)HexNAc(1) (365.13220 Da)

Charge: +3, Monoisotopic m/z: 731.67757 Da (+1.77 mmu/+2.42 ppm), MH+: 2193.01815 Da, RT: 51.6835 min,

Identified with: Sequest HT (v1.17); XCorr:4.05, Percolator q-Value:0.0e0, Percolator PEP:8.1e-5, Ions matched by search engine: 0/0

Fragment match tolerance used for search: 0.06 Da

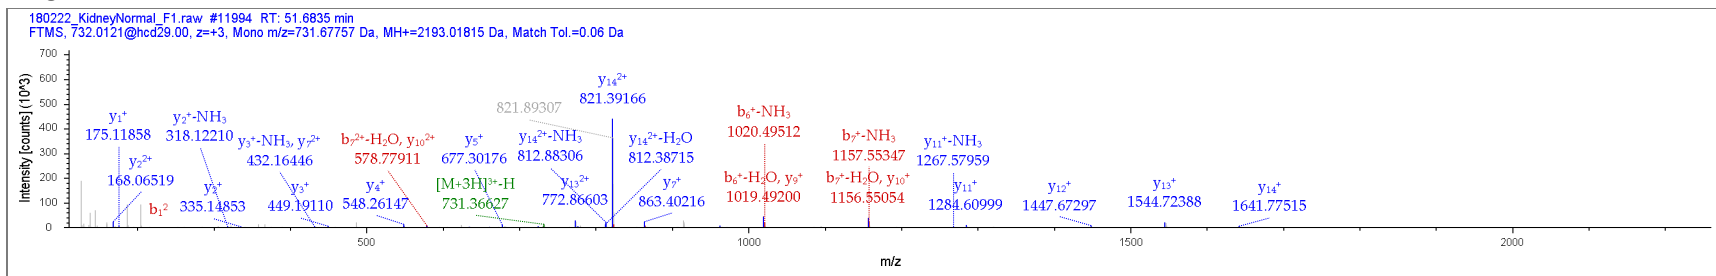

Sequence: SVPPYQHGVSVVNCR, C15-Carbamidomethyl (57.02146 Da), S1-Hex(1)HexNAc(1) (365.13220 Da)

Charge: +3, Monoisotopic m/z: 731.67538 Da (-0.42 mmu/-0.57 ppm), MH+: 2193.01159 Da, RT: 51.7280 min,

Identified with: Sequest HT (v1.17); XCorr:4.39, Percolator q-Value:0.0e0, Percolator PEP:2.3e-5, Ions matched by search engine: 0/0

Fragment match tolerance used for search: 0.06 Da

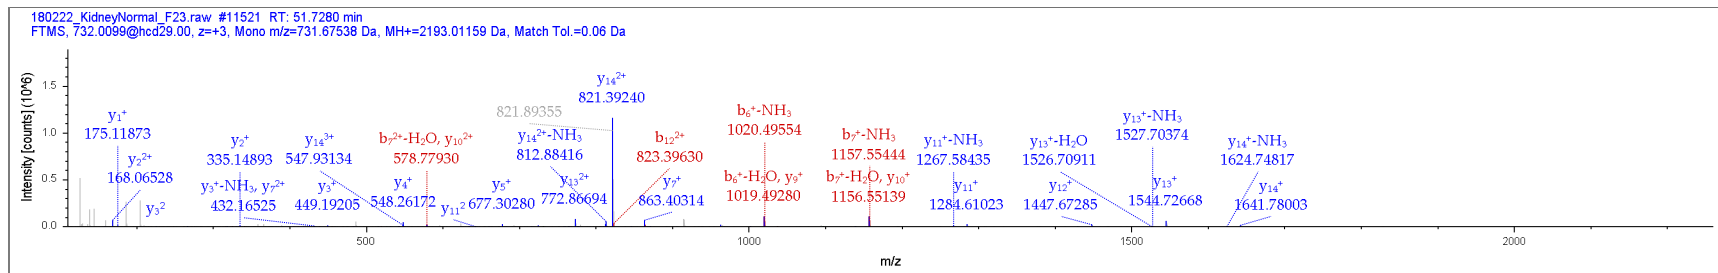

Sequence: SVPALGVTPTR, S1-Hex(1)HexNAc(1) (365.13220 Da)

Charge: +3, Monoisotopic m/z: 521.28221 Da (+0.05 mmu/+0.09 ppm), MH+: 1561.83208 Da, RT: 62.2974 min,

Identified with: Sequest HT (v1.17); XCorr:2.74, Percolator q-Value:0.0e0, Percolator PEP:2.1e-3, Ions matched by search engine: 0/0

Fragment match tolerance used for search: 0.06 Da

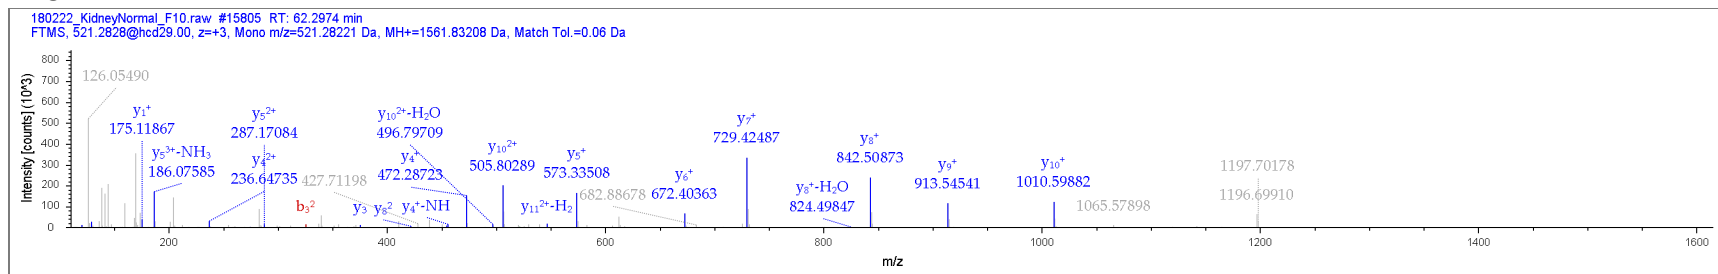

Sequence: SVMSPQDSFK, S1-HexNAc (203.07937 Da), K10-GuanidinyI (42.02180 Da)

Charge: +3, Monoisotopic m/z: 457.54658 Da (-0.16 mmu/-0.35 ppm), MH+: 1370.62518 Da, RT: 53.5138 min,

Identified with: Sequest HT (v1.17); XCorr:2.86, Percolator q-Value:1.6e-3, Percolator PEP:4.9e-2, Ions matched by search engine: 0/0

Fragment match tolerance used for search: 0.06 Da

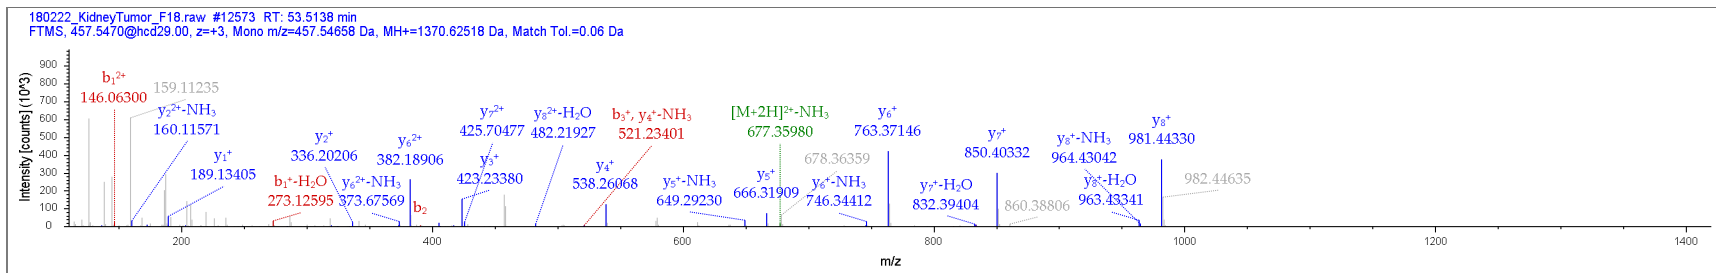

Sequence: SVMSPQDSFK, M3-Oxidation (15.99492 Da), S1-HexNAc (203.07937 Da), K10-GuanidinyI (42.02180 Da)

Charge: +3, Monoisotopic m/z: 462.87799 Da (-0.38 mmu/-0.83 ppm), MH+: 1386.61942 Da, RT: 44.1843 min,

Identified with: Sequest HT (v1.17); XCorr:2.57, Percolator q-Value:3.2e-4, Percolator PEP:2.1e-2, Ions matched by search engine: 0/0

Fragment match tolerance used for search: 0.06 Da

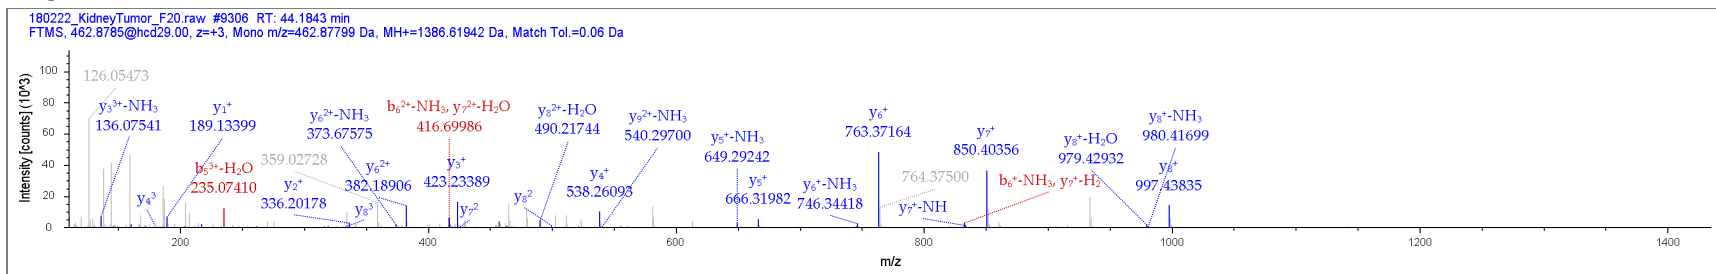

Sequence: SVMSPQDSFK, M3-Oxidation (15.99492 Da), S1-HexNAc (203.07937 Da), K10-GuanidinyI (42.02180 Da)

Charge: +3, Monoisotopic m/z: 462.87787 Da (-0.51 mmu/-1.1 ppm), MH+: 1386.61905 Da, RT: 41.8325 min,

Identified with: Sequest HT (v1.17); XCorr:2.73, Percolator q-Value:2.5e-3, Percolator PEP:6.7e-2, Ions matched by search engine: 0/0

Fragment match tolerance used for search: 0.06 Da

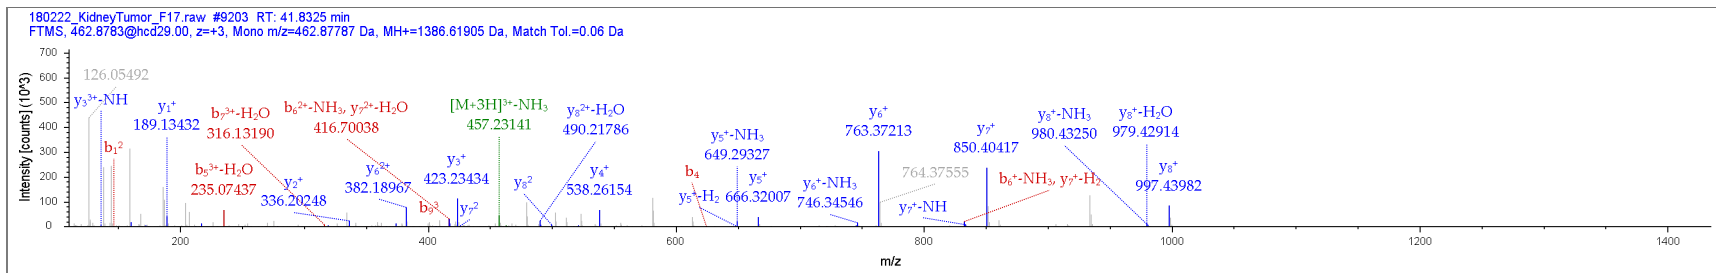

Sequence: SVGQQMIFEEHGFR, S1-Hex(1)HexNAc(1) (365.13220 Da)

Charge: +3, Monoisotopic m/z: 677.31116 Da (+0.59 mmu/+0.88 ppm), MH+: 2029.91893 Da, RT: 69.7721 min,

Identified with: Sequest HT (v1.17); XCorr:4.36, Percolator q-Value:0.0e0, Percolator PEP:1.1e-4, Ions matched by search engine: 0/0

Fragment match tolerance used for search: 0.06 Da

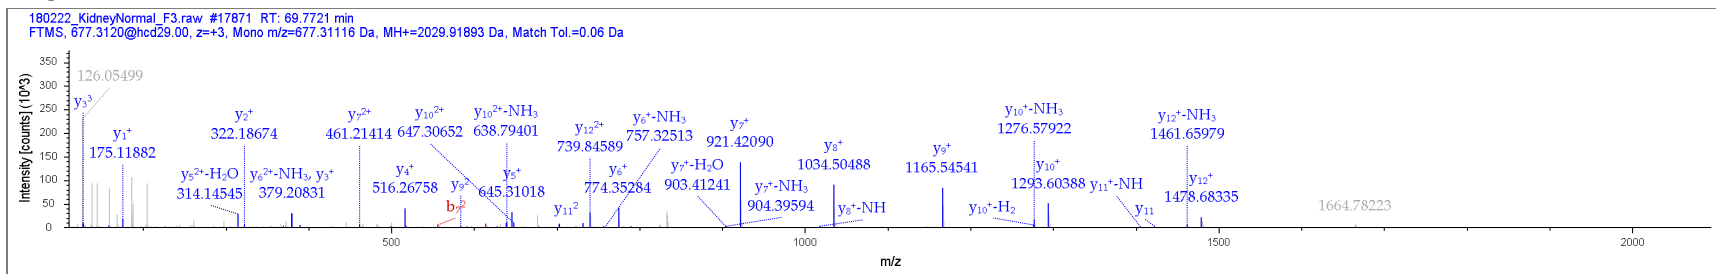

Sequence: SVGQQMIFEEHGFR, S1-Hex(1)HexNAc(1) (365.13220 Da)

Charge: +3, Monoisotopic m/z: 677.30992 Da (-0.65 mmu/-0.96 ppm), MH+: 2029.91519 Da, RT: 69.3487 min,

Identified with: Sequest HT (v1.17); XCorr:4.35, Percolator q-Value:0.0e0, Percolator PEP:3.7e-4, Ions matched by search engine: 0/0

Fragment match tolerance used for search: 0.06 Da

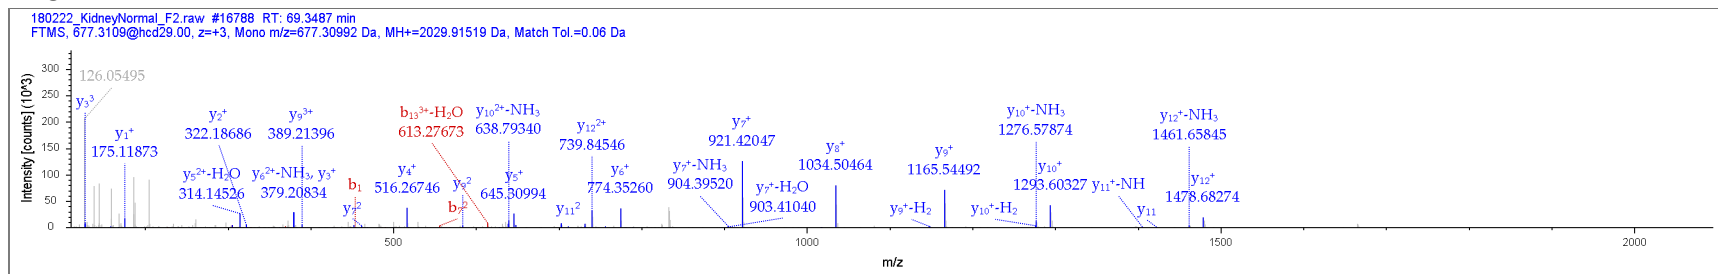

Sequence: SVGQQMIFEEHGFR, M6-Oxidation (15.99492 Da), S1-Hex(1)HexNAc(1) (365.13220 Da)

Charge: +3, Monoisotopic m/z: 682.64259 Da (+0.38 mmu/+0.56 ppm), MH+: 2045.91320 Da, RT: 61.5459 min,

Identified with: Sequest HT (v1.17); XCorr:4.06, Percolator q-Value:0.0e0, Percolator PEP:3.6e-4, Ions matched by search engine: 0/0

Fragment match tolerance used for search: 0.06 Da

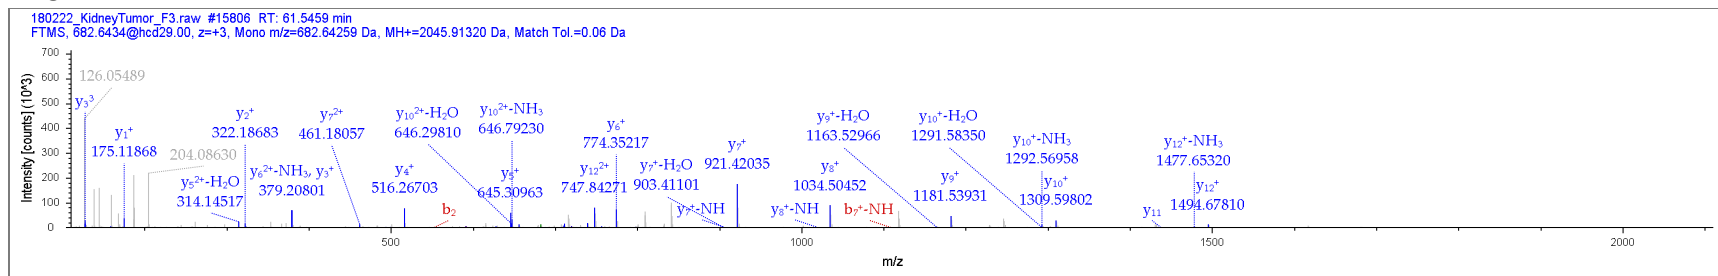



Sequence: SVGQQMIFEEHGFR, M6-Oxidation (15.99492 Da), S1-Hex(1)HexNAc(1) (365.13220 Da)

Charge: +2, Monoisotopic m/z: 1023.45924 Da (-0.43 mmu/-0.42 ppm), MH+: 2045.91120 Da, RT: 61.6403 min,

Identified with: Sequest HT (v1.17); XCorr:2.80, Percolator q-Value:0.0e0, Percolator PEP:1.1e-3, Ions matched by search engine: 0/0

Fragment match tolerance used for search: 0.06 Da

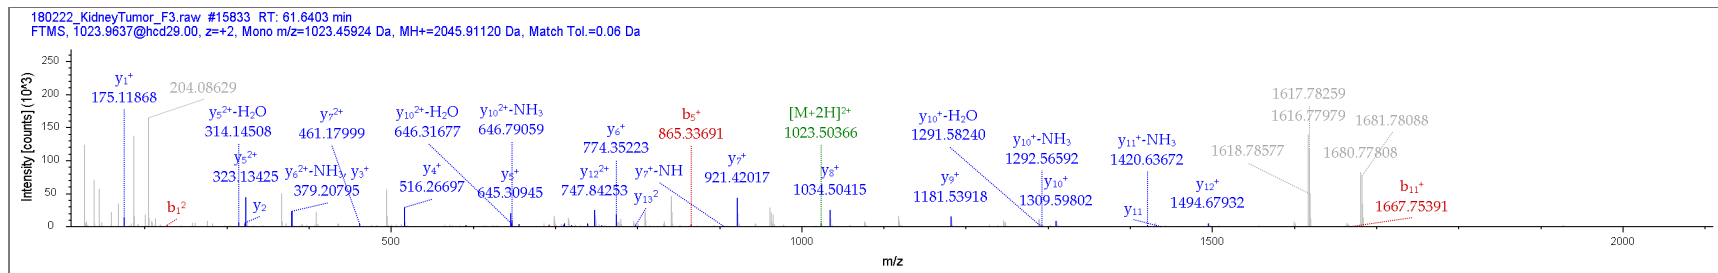

Sequence: SVGAAAGPVVPPCPGR, C13-Carbamidomethyl (57.02146 Da), S1-HexNAc (203.07937 Da)

Charge: +3, Monoisotopic m/z: 565.62215 Da (-0.38 mmu/-0.66 ppm), MH+: 1694.85191 Da, RT: 53.2991 min,

Identified with: Sequest HT (v1.17); XCorr:4.25, Percolator q-Value:0.0e0, Percolator PEP:5.0e-3, Ions matched by search engine: 0/0

Fragment match tolerance used for search: 0.06 Da

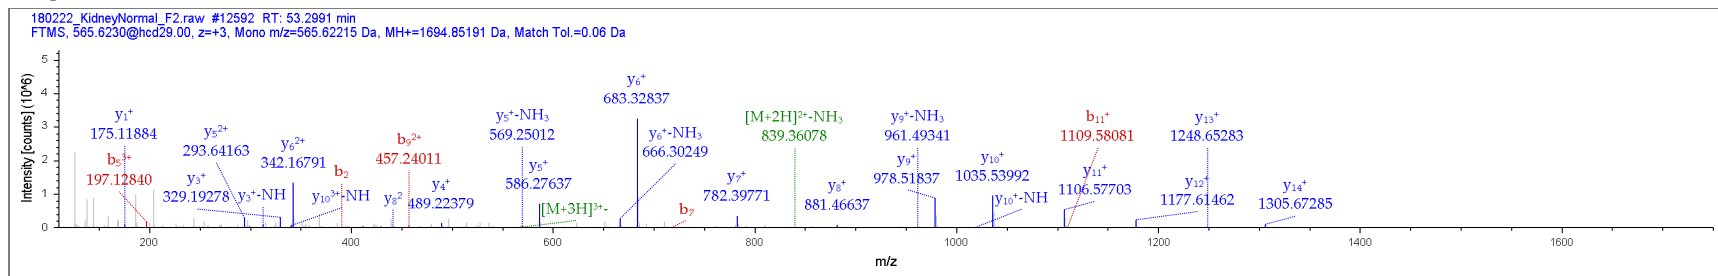

Sequence: SVGAAAGPVVPPCPGR, C13-Carbamidomethyl (57.02146 Da), S1-HexNAc (203.07937 Da)

Charge: +3, Monoisotopic m/z: 565.62191 Da (-0.62 mmu/-1.09 ppm), MH+: 1694.85118 Da, RT: 54.2593 min,

Identified with: Sequest HT (v1.17); XCorr:4.25, Percolator q-Value:5.0e-5, Percolator PEP:5.5e-3, Ions matched by search engine: 0/0

Fragment match tolerance used for search: 0.06 Da

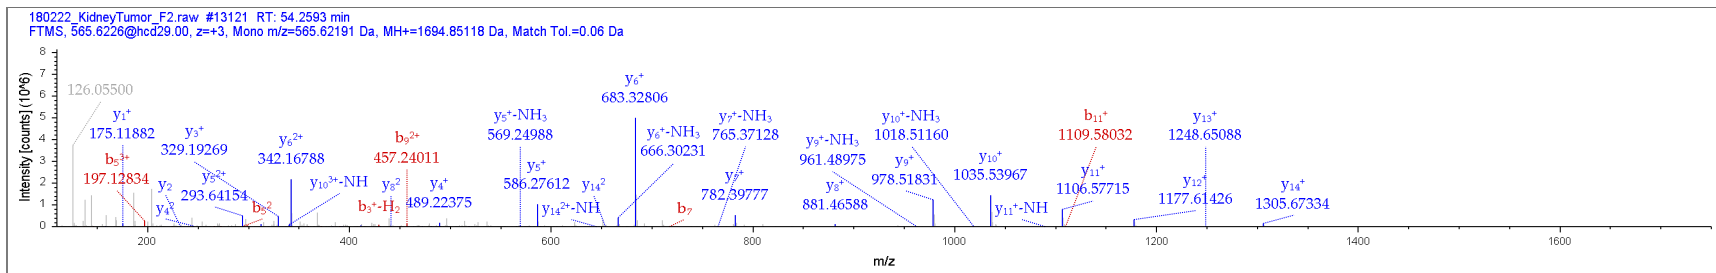

Sequence: SVGAAAGPVVPPCPGR, C13-Carbamidomethyl (57.02146 Da), S1-Hex(1)HexNAc(1) (365.13220 Da)

Charge: +3, Monoisotopic m/z: 619.64023 Da (+0.1 mmu/+0.16 ppm), MH+: 1856.90615 Da, RT: 52.9240 min,

Identified with: Sequest HT (v1.17); XCorr:3.49, Percolator q-Value:1.1e-4, Percolator PEP:9.5e-3, Ions matched by search engine: 0/0

Fragment match tolerance used for search: 0.06 Da

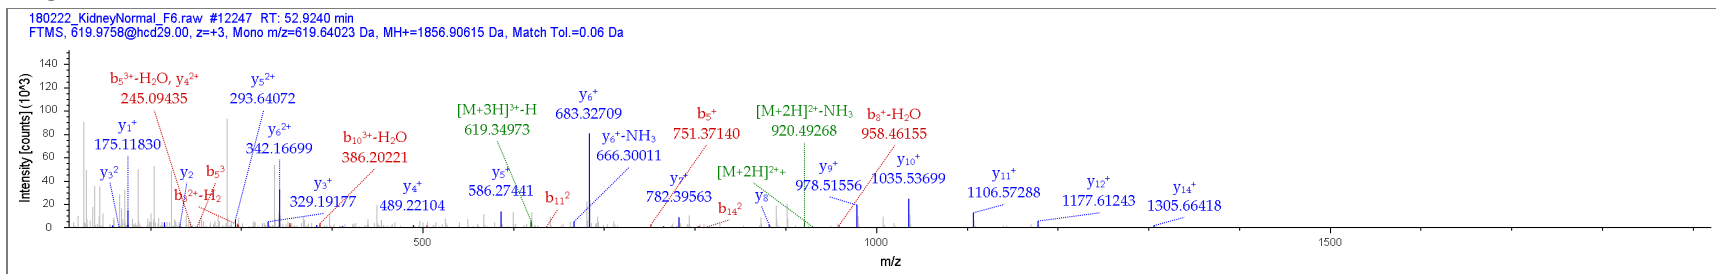

Sequence: SVGAAAGPVVPPCPGR, C13-Carbamidomethyl (57.02146 Da), S1-Hex(1)HexNAc(1) (365.13220 Da)

Charge: +3, Monoisotopic m/z: 619.64018 Da (+0.05 mmu/+0.08 ppm), MH+: 1856.90600 Da, RT: 56.0416 min,

Identified with: Sequest HT (v1.17); XCorr:3.99, Percolator q-Value:5.0e-5, Percolator PEP:2.9e-3, Ions matched by search engine: 0/0

Fragment match tolerance used for search: 0.06 Da

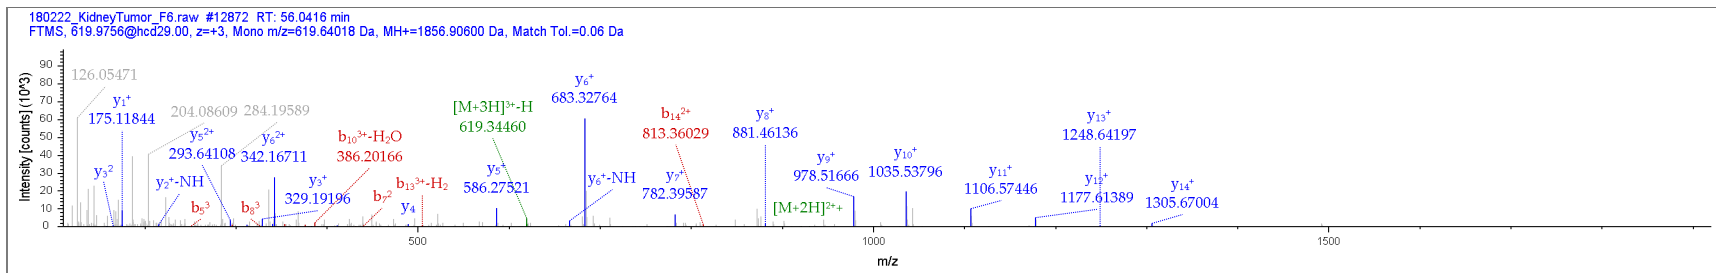

Sequence: SVGAAAGPVVPPCPGR, C13-Carbamidomethyl (57.02146 Da), S1-HexNAc (203.07937 Da)

Charge: +3, Monoisotopic m/z: 565.62229 Da (-0.24 mmu/-0.42 ppm), MH+: 1694.85232 Da, RT: 53.8347 min,

Identified with: Sequest HT (v1.17); XCorr:4.29, Percolator q-Value:0.0e0, Percolator PEP:4.8e-3, Ions matched by search engine: 0/0

Fragment match tolerance used for search: 0.06 Da

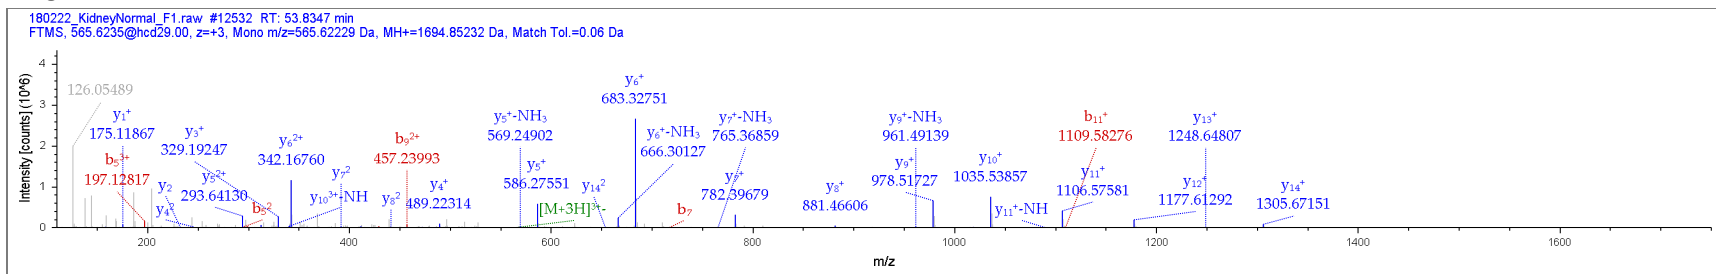

Sequence: SVGAAAGPVVPPCPGR, C13-Carbamidomethyl (57.02146 Da), S1-Hex(1)HexNAc(1) (365.13220 Da)

Charge: +2, Monoisotopic m/z: 928.95698 Da (+0.41 mmu/+0.44 ppm), MH+: 1856.90668 Da, RT: 55.2459 min,

Identified with: Sequest HT (v1.17); XCorr:2.42, Percolator q-Value:0.0e0, Percolator PEP:1.4e-4, Ions matched by search engine: 0/0

Fragment match tolerance used for search: 0.06 Da

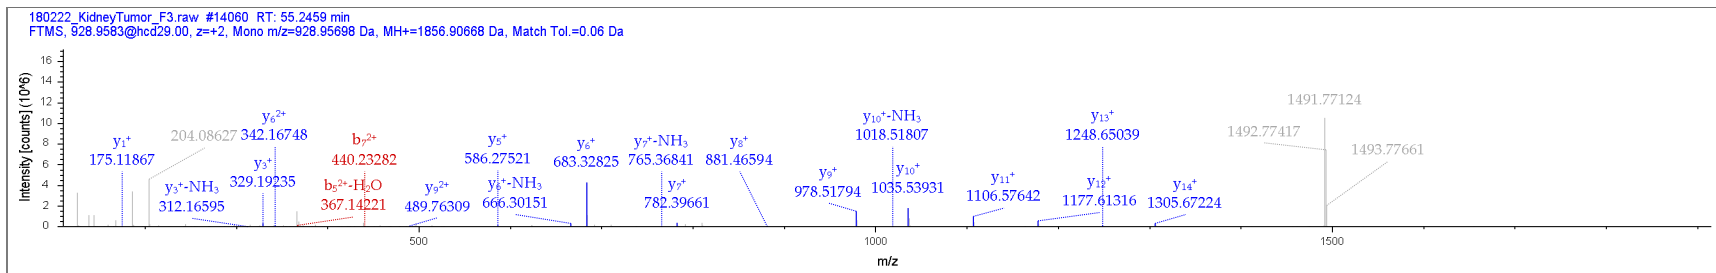

Sequence: SVFPAQDKPGELQATLDHTGHTSSK, K8-GuanidinyI (42.02180 Da), K25-GuanidinyI (42.02180 Da), S1-Hex(1)HexNAc(1) (365.13220 Da)

Charge: +5, Monoisotopic m/z: 620.90307 Da (+0.9 mmu/+1.45 ppm), MH+: 3100.48627 Da, RT: 66.6775 min,

Identified with: Sequest HT (v1.17); XCorr:4.94, Percolator q-Value:0.0e0, Percolator PEP:1.8e-4, Ions matched by search engine: 0/0

Fragment match tolerance used for search: 0.06 Da

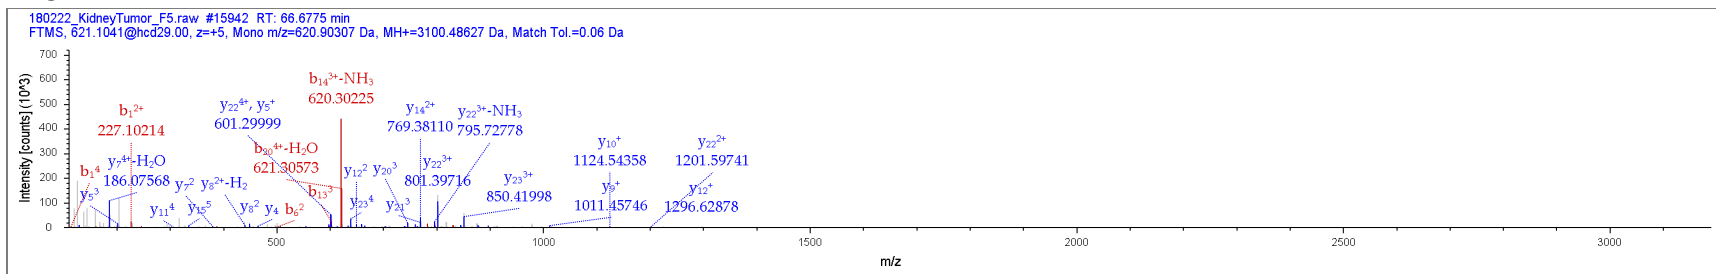

Sequence: SVAAAAGPAPQSLDLHK, K17-GuanidinyI (42.02180 Da), S1-Hex(1)HexNAc(1) (365.13220 Da)

Charge: +3, Monoisotopic m/z: 680.67915 Da (-0.5 mmu/-0.74 ppm), MH+: 2040.02289 Da, RT: 55.5730 min,

Identified with: Sequest HT (v1.17); XCorr:5.21, Percolator q-Value:0.0e0, Percolator PEP:7.6e-6, Ions matched by search engine: 0/0

Fragment match tolerance used for search: 0.06 Da

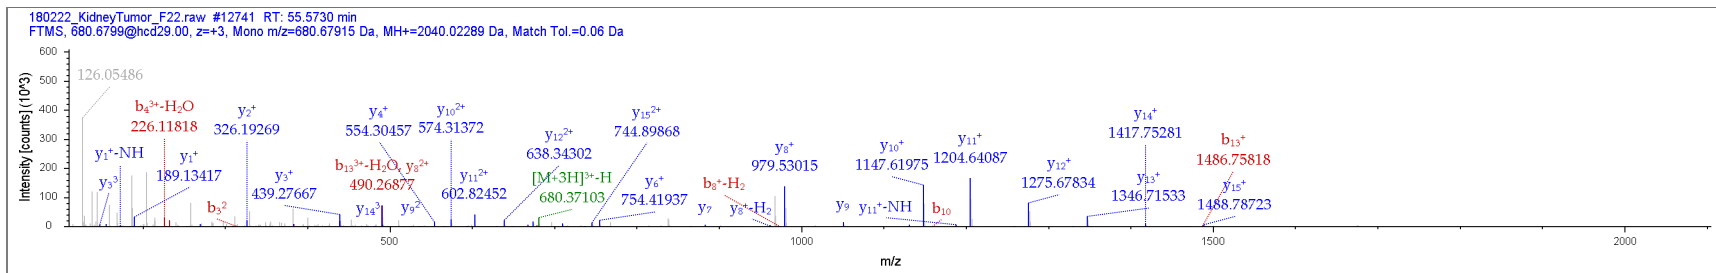

Sequence: STVAPPPIHQPAVP, S1-Hex(1)HexNAc(1) (365.13220 Da), T2-Hex(1)HexNAc(1) (365.13220 Da)

Charge: +2, Monoisotopic m/z: 1051.00854 Da (+1.37 mmu/+1.3 ppm), MH+: 2101.00980 Da, RT: 55.2389 min,

Identified with: Sequest HT (v1.17); XCorr:1.06, Percolator q-Value:6.5e-3, Percolator PEP:1.3e-1, Ions matched by search engine: 0/0

Fragment match tolerance used for search: 0.06 Da

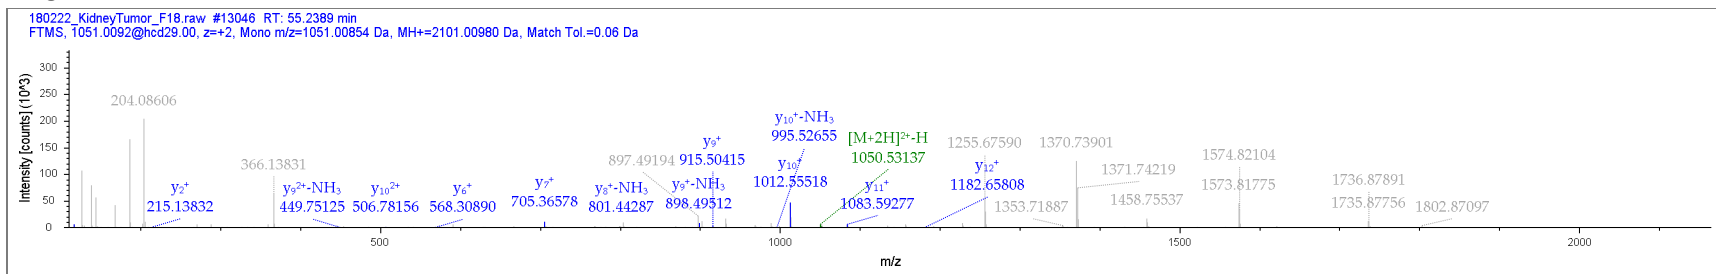

Sequence: STQSPDLEILR, T2-HexNAc (203.07937 Da), S1-Hex(1)HexNAc(1) (365.13220 Da)

Charge: +3, Monoisotopic m/z: 641.98086 Da (-0.02 mmu/-0.03 ppm), MH+: 1923.92803 Da, RT: 67.1564 min,

Identified with: Sequest HT (v1.17); XCorr:2.42, Percolator q-Value:2.2e-3, Percolator PEP:9.1e-2, Ions matched by search engine: 0/0

Fragment match tolerance used for search: 0.06 Da

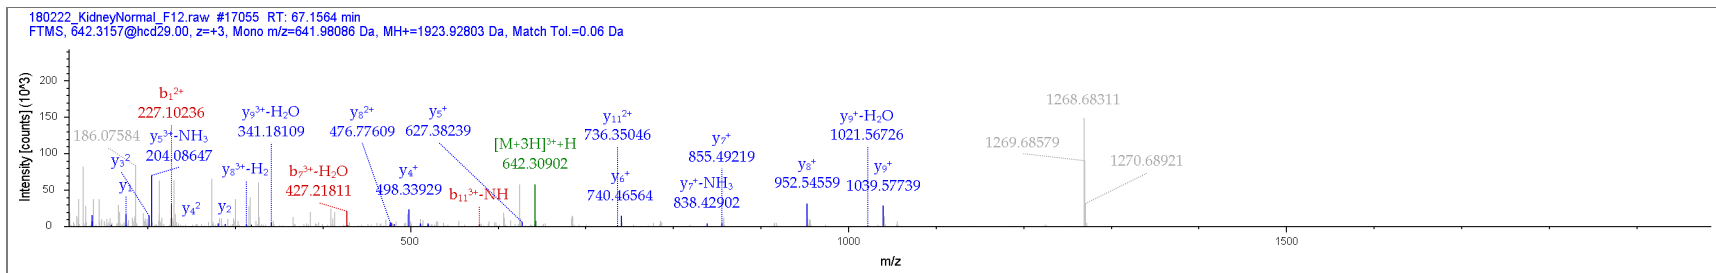

Sequence: STPTVQVTPQLETK, S1-HexNAc (203.07937 Da), K14-GuanidinyI (42.02180 Da), T2-Hex(1)HexNAc(1) (365.13220 Da)

Charge: +3, Monoisotopic m/z: 713.69066 Da (+0.78 mmu/+1.09 ppm), MH+: 2139.05742 Da, RT: 59.1132 min,

Identified with: Sequest HT (v1.17); XCorr:3.38, Percolator q-Value:0.0e0, Percolator PEP:4.3e-3, Ions matched by search engine: 0/0

Fragment match tolerance used for search: 0.06 Da

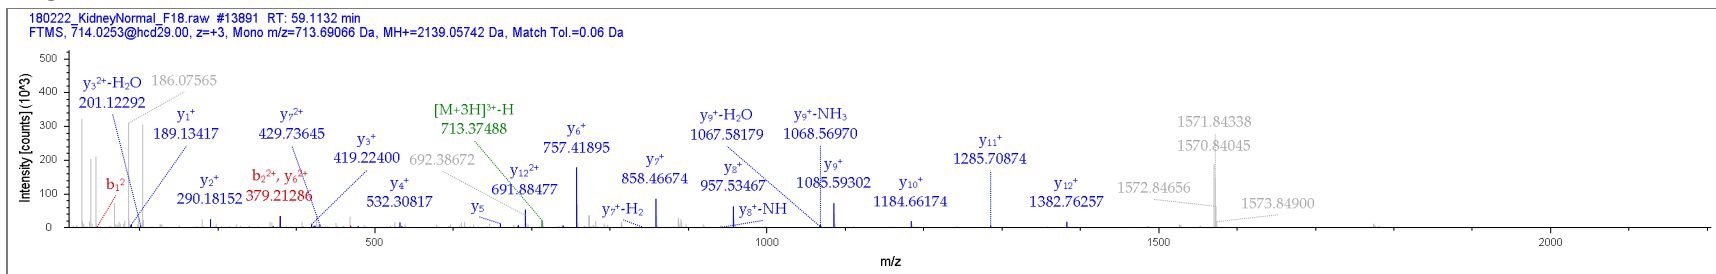

Sequence: STPPTPSPSCCHPR, C10-Carbamidomethyl (57.02146 Da), C11-Carbamidomethyl (57.02146 Da), T2-HexNAc (203.07937 Da)

Charge: +3, Monoisotopic m/z: 595.26220 Da (-0.59 mmu/-0.99 ppm), MH+: 1783.77203 Da, RT: 23.9140 min,

Identified with: Sequest HT (v1.17); XCorr:3.50, Percolator q-Value:0.0e0, Percolator PEP:5.2e-4, Ions matched by search engine: 0/0

Fragment match tolerance used for search: 0.06 Da

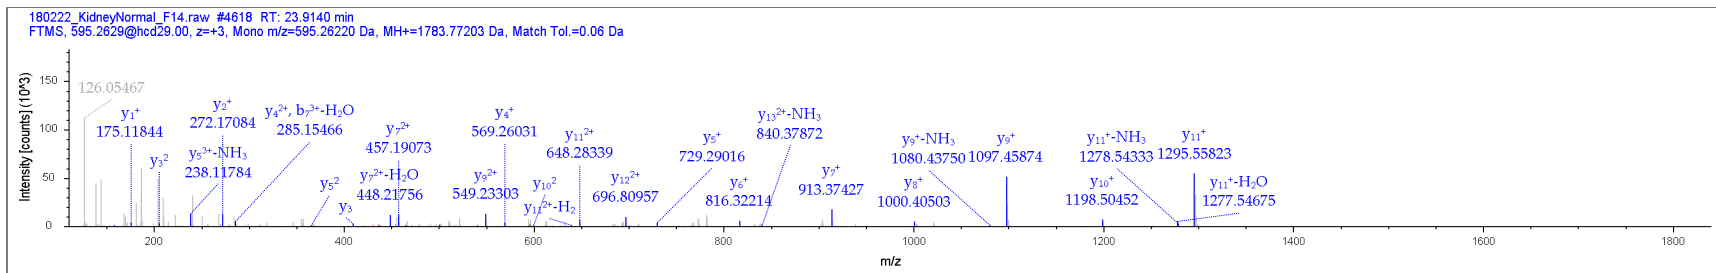

Sequence: STPPTPSPSCCHPR, C10-Carbamidomethyl (57.02146 Da), C11-Carbamidomethyl (57.02146 Da), T2-Hex(1)HexNAc(1) (365.13220 Da)

Charge: +3, Monoisotopic m/z: 649.28271 Da (+2.33 mmu/+3.58 ppm), MH+: 1945.83359 Da, RT: 29.7574 min,

Identified with: Sequest HT (v1.17); XCorr:2.86, Percolator q-Value:0.0e0, Percolator PEP:3.4e-4, Ions matched by search engine: 0/0

Fragment match tolerance used for search: 0.06 Da

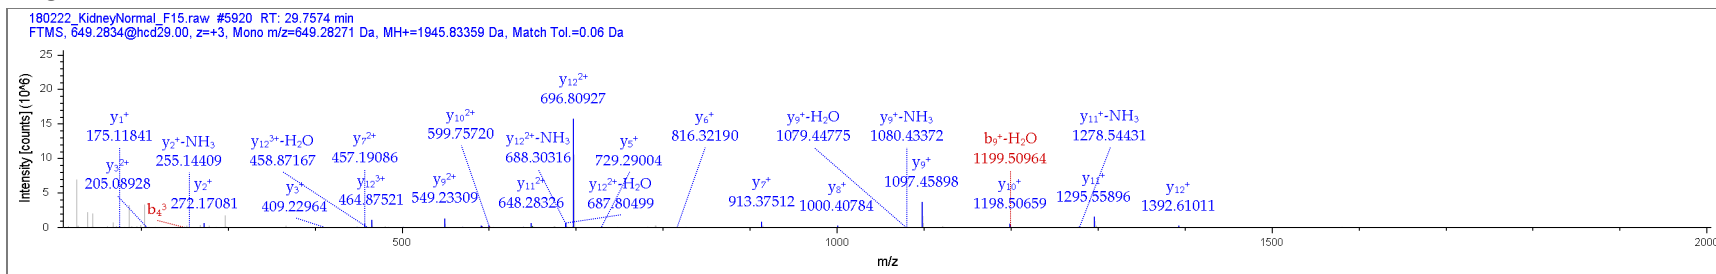

Sequence: STPPTPSPSCCHPR, C10-Carbamidomethyl (57.02146 Da), C11-Carbamidomethyl (57.02146 Da), T2-Hex(1)HexNAc(1) (365.13220 Da)

Charge: +3, Monoisotopic m/z: 649.28014 Da (-0.25 mmu/-0.39 ppm), MH+: 1945.82585 Da, RT: 30.5794 min,

Identified with: Sequest HT (v1.17); XCorr:2.97, Percolator q-Value:0.0e0, Percolator PEP:7.6e-6, Ions matched by search engine: 0/0

Fragment match tolerance used for search: 0.06 Da

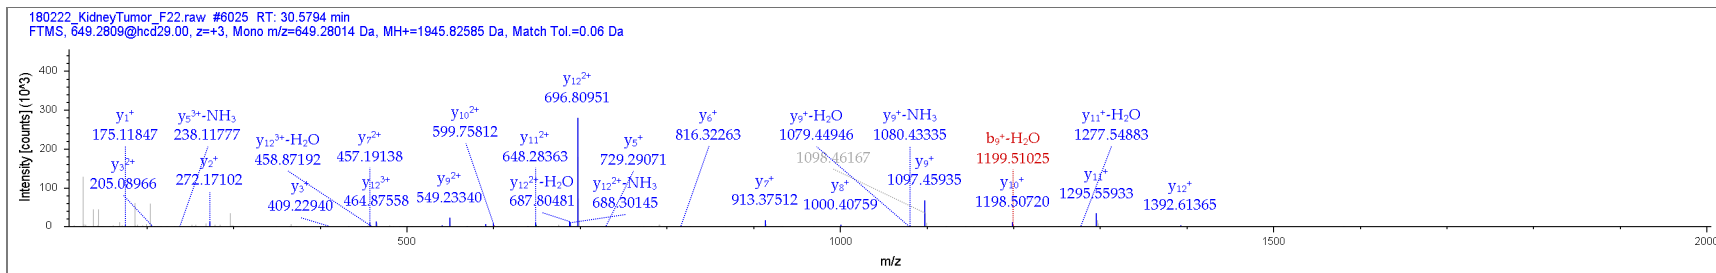

Sequence: STPPTPSPSCCHPR, C10-Carbamidomethyl (57.02146 Da), C11-Carbamidomethyl (57.02146 Da), S1-Hex(1)HexNAc(1) (365.13220 Da)

Charge: +3, Monoisotopic m/z: 649.28142 Da (+1.03 mmu/+1.59 ppm), MH+: 1945.82971 Da, RT: 28.4168 min,

Identified with: Sequest HT (v1.17); XCorr:3.92, Percolator q-Value:0.0e0, Percolator PEP:8.8e-5, Ions matched by search engine: 0/0

Fragment match tolerance used for search: 0.06 Da

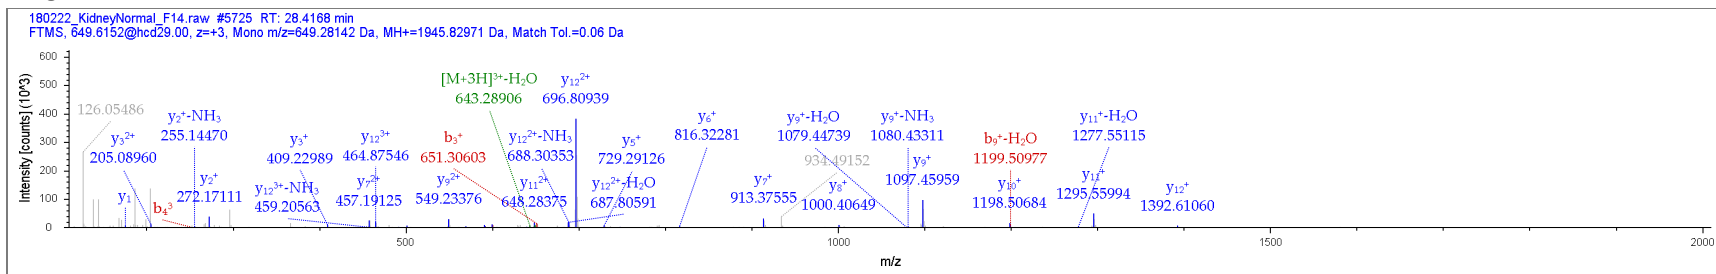



Sequence: STPPTPSPSCCHPR, C10-Carbamidomethyl (57.02146 Da), C11-Carbamidomethyl (57.02146 Da), S1-HexNAc (203.07937 Da)

Charge: +4, Monoisotopic m/z: 446.69771 Da (-1.2 mmu/-2.68 ppm), MH+: 1783.76902 Da, RT: 25.1498 min,

Identified with: Sequest HT (v1.17); XCorr:4.87, Percolator q-Value:0.0e0, Percolator PEP:1.5e-3, Ions matched by search engine: 0/0

Fragment match tolerance used for search: 0.06 Da

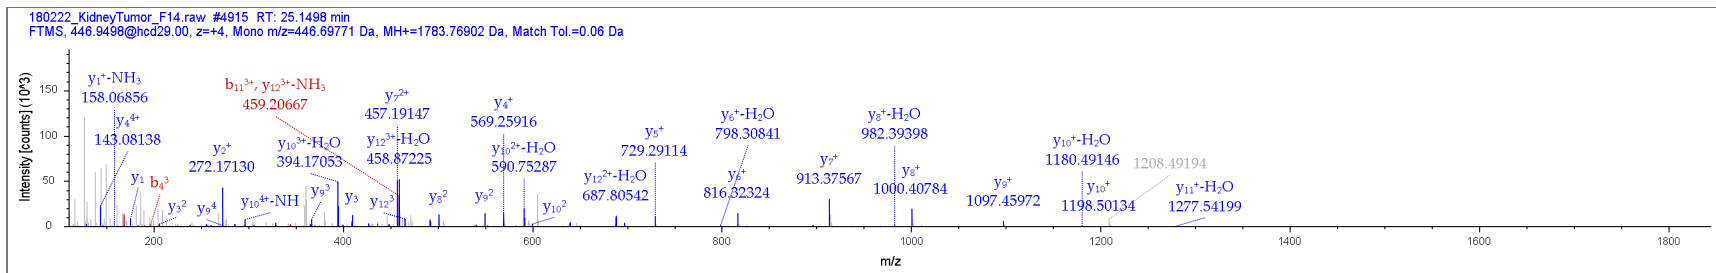

Sequence: STPPTPSPSCCHPR, C10-Carbamidomethyl (57.02146 Da), C11-Carbamidomethyl (57.02146 Da), S1-HexNAc (203.07937 Da)

Charge: +3, Monoisotopic m/z: 595.26337 Da (+0.59 mmu/+0.99 ppm), MH+: 1783.77556 Da, RT: 29.3748 min,

Identified with: Sequest HT (v1.17); XCorr:3.54, Percolator q-Value:0.0e0, Percolator PEP:4.1e-4, Ions matched by search engine: 0/0

Fragment match tolerance used for search: 0.06 Da

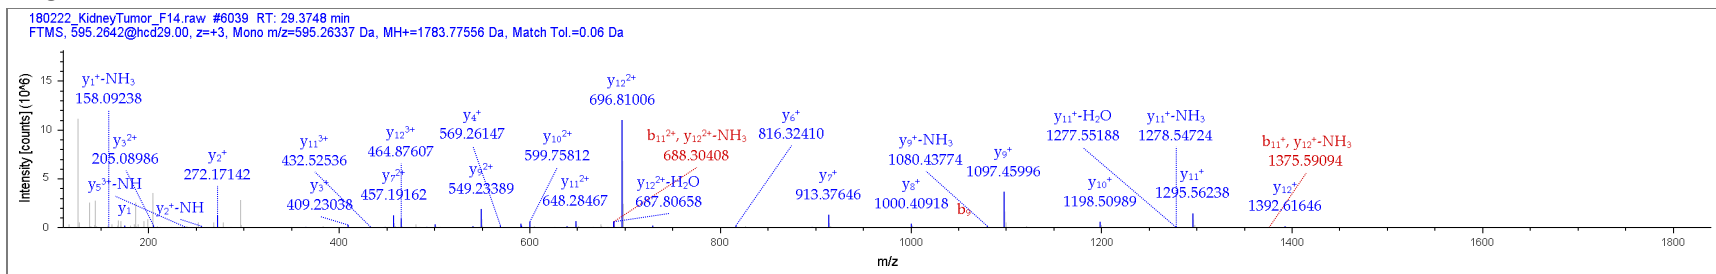

Sequence: SPSTPPTPSPSCCHPR, C12-Carbamidomethyl (57.02146 Da), C13-Carbamidomethyl (57.02146 Da), S1-Hex(1)HexNAc(1) (365.13220 Da)

Charge: +3, Monoisotopic m/z: 710.64181 Da (-0.18 mmu/-0.25 ppm), MH+: 2129.91088 Da, RT: 34.5310 min,

Identified with: Sequest HT (v1.17); XCorr:4.73, Percolator q-Value:0.0e0, Percolator PEP:1.8e-7, Ions matched by search engine: 0/0

Fragment match tolerance used for search: 0.06 Da

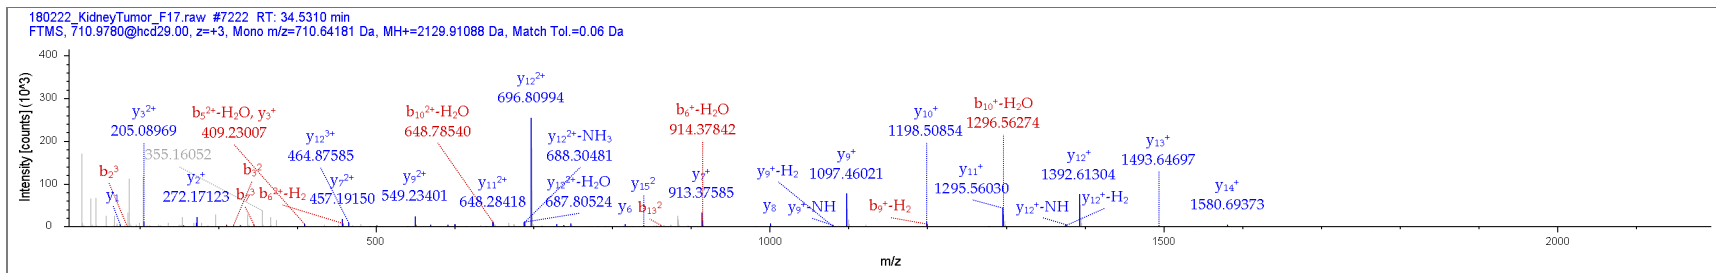

Sequence: SPSTPPTPSPSCCHPR, C12-Carbamidomethyl (57.02146 Da), C13-Carbamidomethyl (57.02146 Da), T4-HexNAc (203.07937 Da), S1-Hex(1)HexNAc(1) (365.13220 Da), S3-Hex(1)HexNAc(1) (365.13220 Da)

Charge: +3, Monoisotopic m/z: 900.04593 Da (+0.08 mmu/+0.09 ppm), MH+: 2698.12323 Da, RT: 32.6138 min,

Identified with: Sequest HT (v1.17); XCorr:2.64, Percolator q-Value:0.0e0, Percolator PEP:1.1e-3, Ions matched by search engine: 0/0

Fragment match tolerance used for search: 0.06 Da

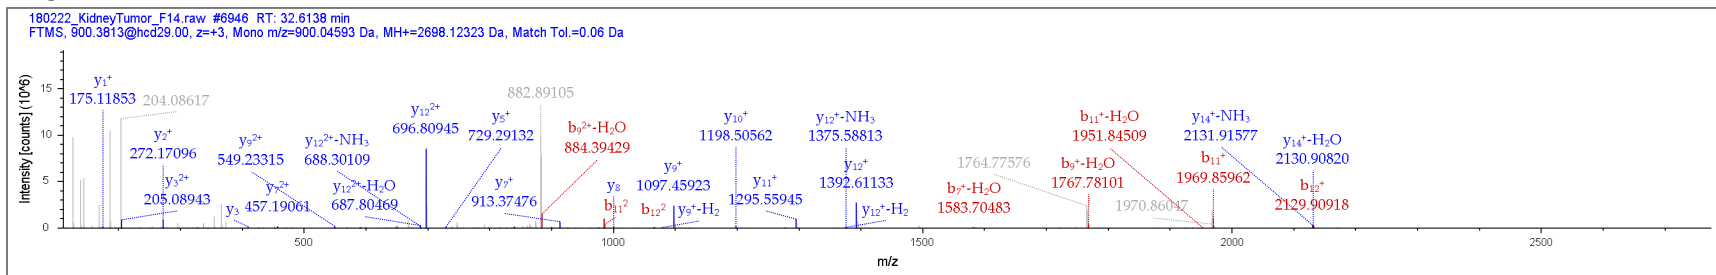

Sequence: SPSTPPTSPSCCHPR, C12-Carbamidomethyl (57.02146 Da), C13-Carbamidomethyl (57.02146 Da), T4-HexNAc (203.07937 Da), S1-Hex(1)HexNAc(1) (365.13220 Da), S3-Hex(1)HexNAc(1) (365.13220 Da)

Charge: +4, Monoisotopic m/z: 675.28788 Da (+1.68 mmu/+2.49 ppm), MH+: 2698.12971 Da, RT: 31.7167 min,

Identified with: Sequest HT (v1.17); XCorr:3.09, Percolator q-Value:0.0e0, Percolator PEP:2.3e-4, Ions matched by search engine: 0/0

Fragment match tolerance used for search: 0.06 Da

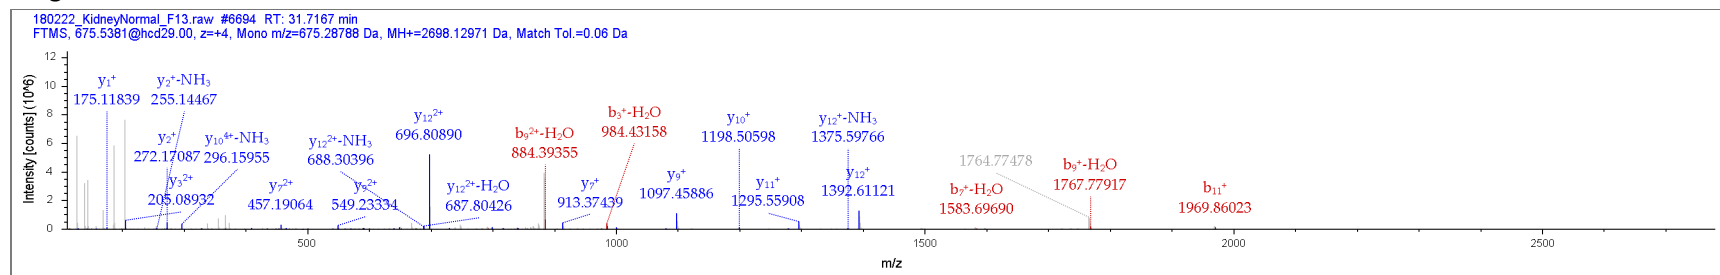

Sequence: SGVLPGGGFVASAAVAGPEMQTGR, S1-Hex(1)HexNAc(1) (365.13220 Da)

Charge: +3, Monoisotopic m/z: 884.76761 Da (+2.05 mmu/+2.31 ppm), MH+: 2652.28827 Da, RT: 95.7091 min,

Identified with: Sequest HT (v1.17); XCorr:6.59, Percolator q-Value:0.0e0, Percolator PEP:5.8e-8, Ions matched by search engine: 0/0

Fragment match tolerance used for search: 0.06 Da

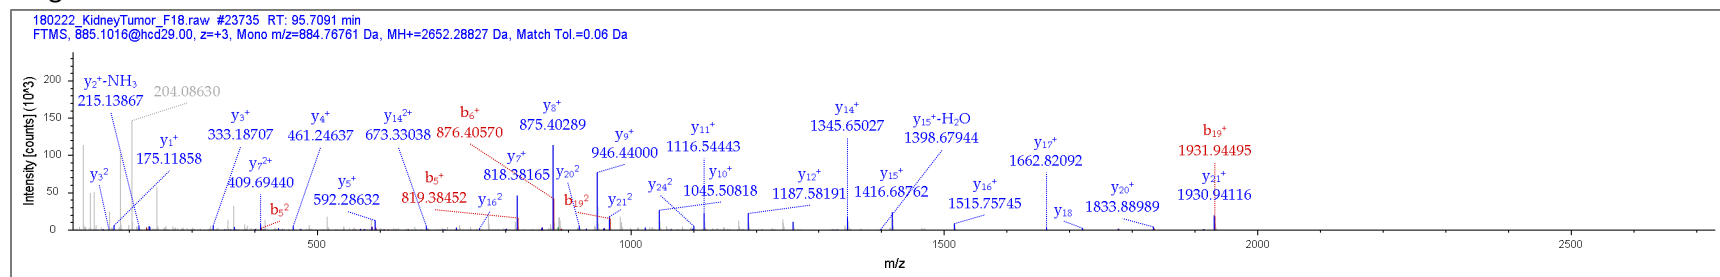

Sequence: SGVLPGGGFVASAAVAGPEMQTGR, M21-Oxidation (15.99492 Da), S1-Hex(1)HexNAc(1) (365.13220 Da)

Charge: +3, Monoisotopic m/z: 890.09841 Da (+1.21 mmu/+1.36 ppm), MH+: 2668.28067 Da, RT: 87.3296 min,

Identified with: Sequest HT (v1.17); XCorr:5.68, Percolator q-Value:0.0e0, Percolator PEP:2.0e-7, Ions matched by search engine: 0/0

Fragment match tolerance used for search: 0.06 Da

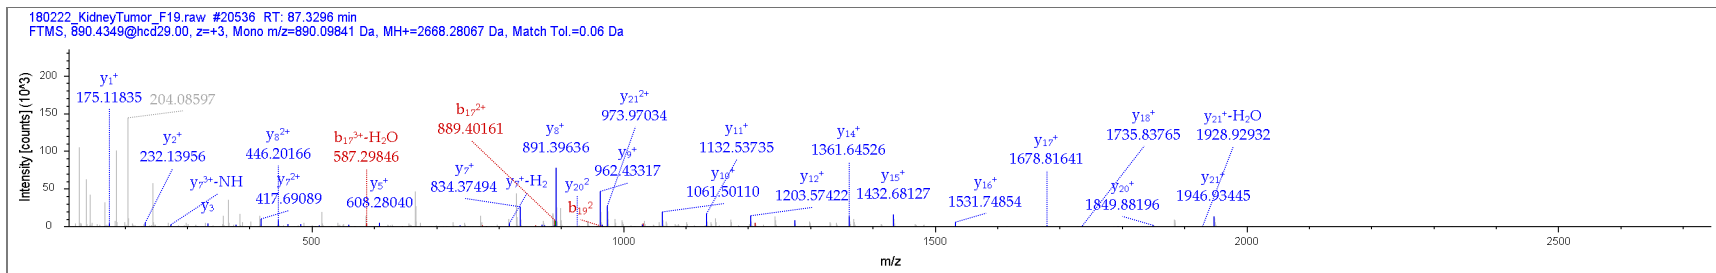

Sequence: SGSPDLSETTSFHEANLER, S1-Hex(1)HexNAc(1) (365.13220 Da)

Charge: +3, Monoisotopic m/z: 838.37755 Da (+0.64 mmu/+0.77 ppm), MH+: 2513.11810 Da, RT: 68.6861 min,

Identified with: Sequest HT (v1.17); XCorr:5.28, Percolator q-Value:0.0e0, Percolator PEP:5.6e-7, Ions matched by search engine: 0/0

Fragment match tolerance used for search: 0.06 Da

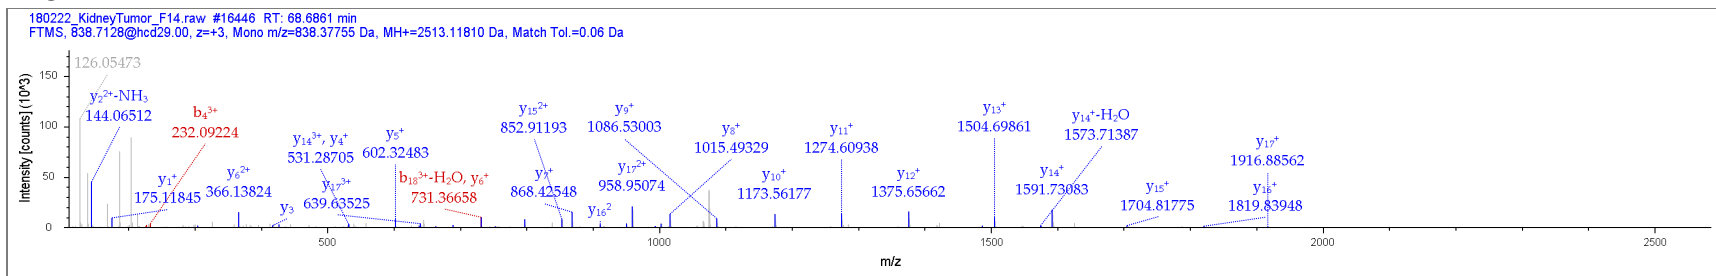

Sequence: SGSGYVPGSVSAAFVTCPNEK, C17-Carbamidomethyl (57.02146 Da), S3-HexNAc (203.07937 Da), K21-GuanidinyI (42.02180 Da), S1-Hex(1)HexNAc(1) (365.13220 Da)

Charge: +3, Monoisotopic m/z: 908.73940 Da (-5.2 mmu/-5.73 ppm), MH+: 2724.20366 Da, RT: 81.6999 min,

Identified with: Sequest HT (v1.17); XCorr:3.70, Percolator q-Value:5.0e-5, Percolator PEP:2.6e-3, Ions matched by search engine: 0/0

Fragment match tolerance used for search: 0.06 Da

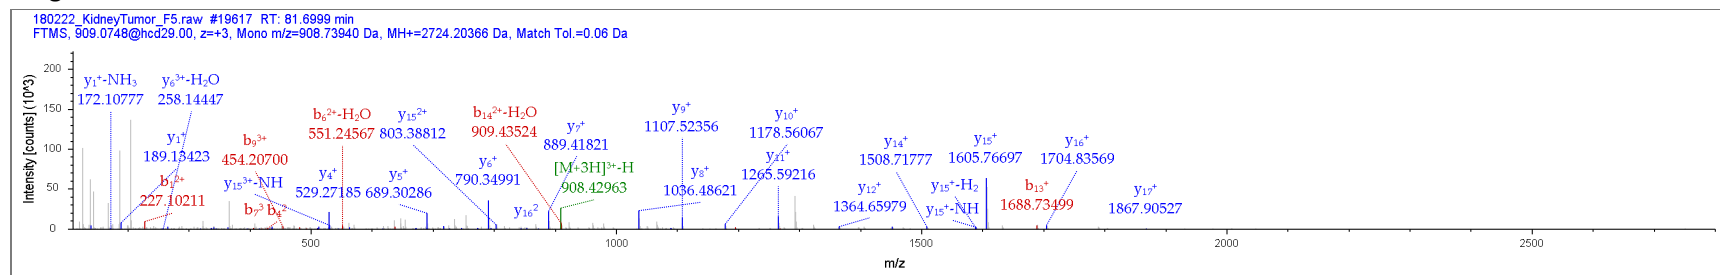

Sequence: SGQQPSVGQQMIFEEHGFR, S1-Hex(1)HexNAc(1) (365.13220 Da)

Charge: +3, Monoisotopic m/z: 843.05193 Da (+0.23 mmu/+0.27 ppm), MH+: 2527.14124 Da, RT: 75.6487 min,

Identified with: Sequest HT (v1.17); XCorr:4.63, Percolator q-Value:0.0e0, Percolator PEP:1.5e-5, Ions matched by search engine: 0/0

Fragment match tolerance used for search: 0.06 Da

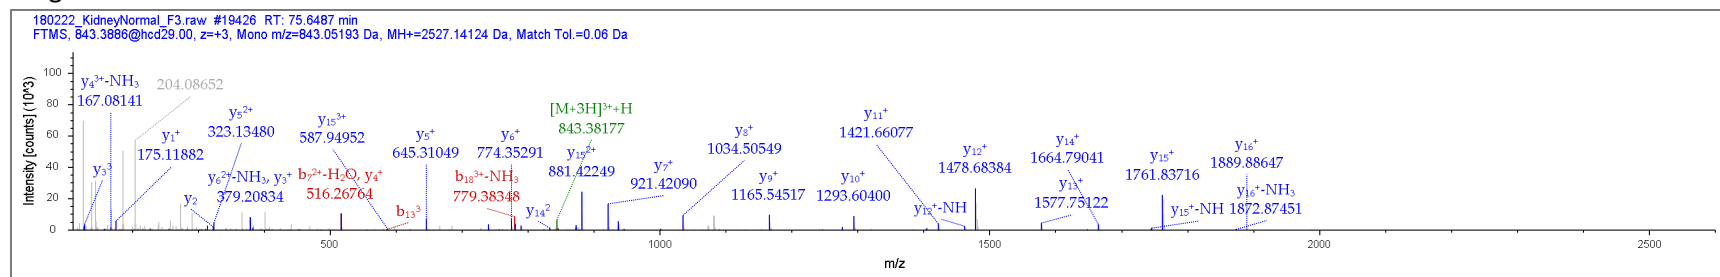

Sequence: SGPPAQDQDIPCASEDESGQWK, C11-Carbamidomethyl (57.02146 Da), K22-Guanidinyl (42.02180 Da), S14-Hex(1)HexNAc(1) (365.13220 Da)

Charge: +4, Monoisotopic m/z: 703.04953 Da (+0.55 mmu/+0.78 ppm), MH+: 2809.17630 Da, RT: 62.1231 min,

Identified with: Sequest HT (v1.17); XCorr:4.45, Percolator q-Value:2.1e-4, Percolator PEP:1.4e-2, Ions matched by search engine: 0/0

Fragment match tolerance used for search: 0.06 Da

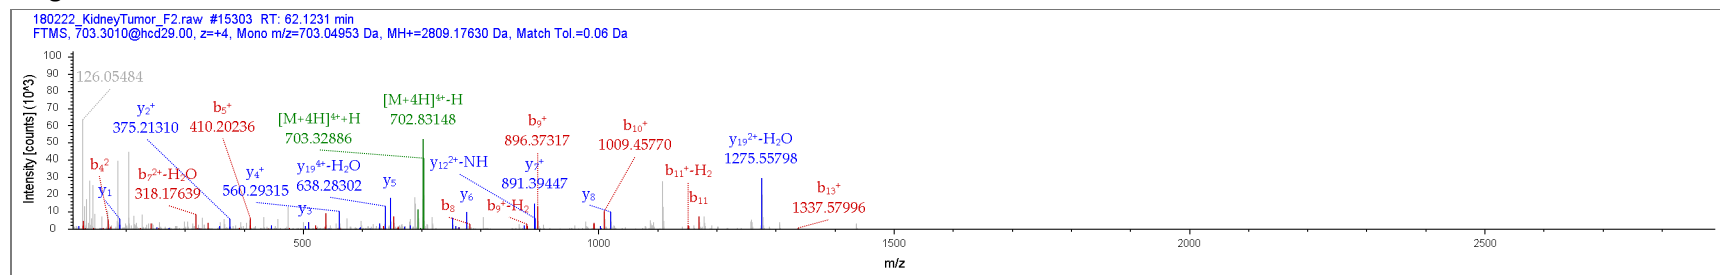

Sequence: SGPPAQDQDIPCASEDESGQWK, C11-Carbamidomethyl (57.02146 Da), K22-Guanidinyl (42.02180 Da), S1-Hex(1)HexNAc(1) (365.13220 Da)

Charge: +3, Monoisotopic m/z: 937.06352 Da (+0.64 mmu/+0.68 ppm), MH+: 2809.17601 Da, RT: 62.6727 min,

Identified with: Sequest HT (v1.17); XCorr:6.32, Percolator q-Value:0.0e0, Percolator PEP:3.7e-7, Ions matched by search engine: 0/0

Fragment match tolerance used for search: 0.06 Da

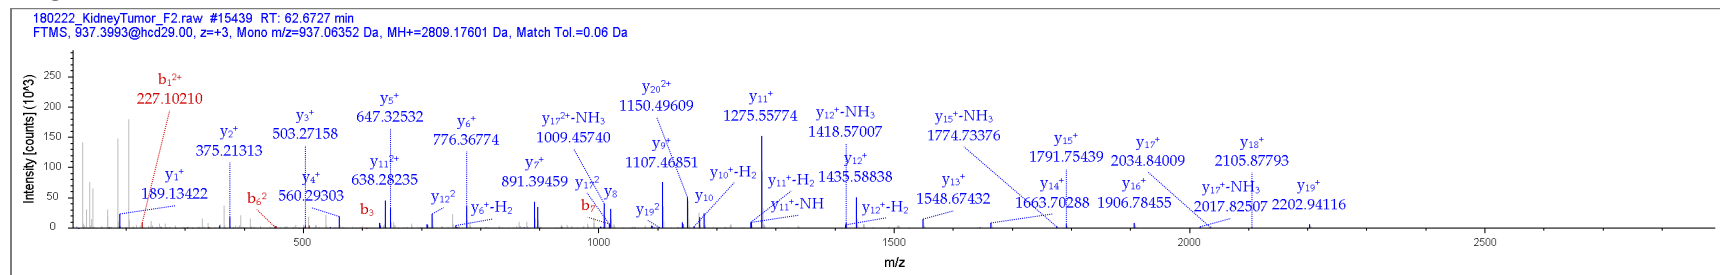

Sequence: SGPPAQDQDICPASEDESGQWK, C11-Carbamidomethyl (57.02146 Da), K22-GuanidinyI (42.02180 Da), S1-Hex(1)HexNAc(1) (365.13220 Da)

Charge: +3, Monoisotopic m/z: 937.06421 Da (+1.32 mmu/+1.41 ppm), MH+: 2809.17806 Da, RT: 61.7246 min,

Identified with: Sequest HT (v1.17); XCorr:6.18, Percolator q-Value:0.0e0, Percolator PEP:4.8e-6, Ions matched by search engine: 0/0

Fragment match tolerance used for search: 0.06 Da

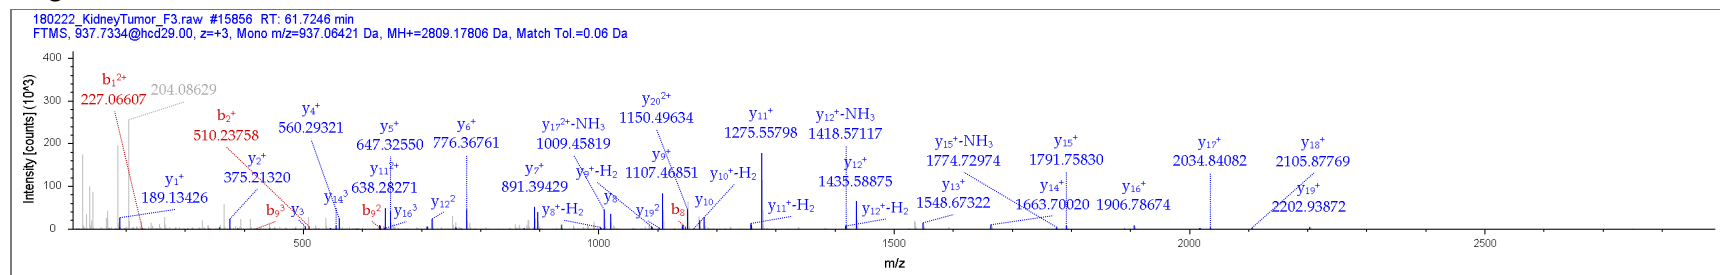

Sequence: SGLPSGIAEVSGESSR, S1-HexNAc (203.07937 Da)

Charge: +3, Monoisotopic m/z: 579.28217 Da (-0.83 mmu/-1.44 ppm), MH+: 1735.83197 Da, RT: 61.5373 min,

Identified with: Sequest HT (v1.17); XCorr:4.25, Percolator q-Value:0.0e0, Percolator PEP:9.8e-4, Ions matched by search engine: 0/0

Fragment match tolerance used for search: 0.06 Da

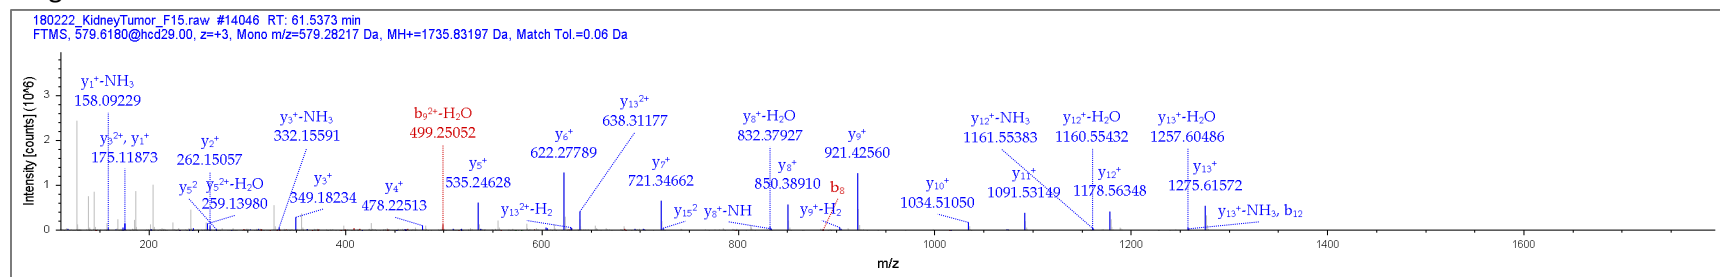

Sequence: SGLPSGFSGEYSGVDLGSPP, S18-Hex(1)HexNAc(1) (365.13220 Da)

Charge: +2, Monoisotopic m/z: 1166.52259 Da (+1.42 mmu/+1.22 ppm), MH+: 2332.03791 Da, RT: 92.4162 min,

Identified with: Sequest HT (v1.17); XCorr:3.31, Percolator q-Value:8.0e-4, Percolator PEP:3.3e-2, Ions matched by search engine: 0/0

Fragment match tolerance used for search: 0.06 Da

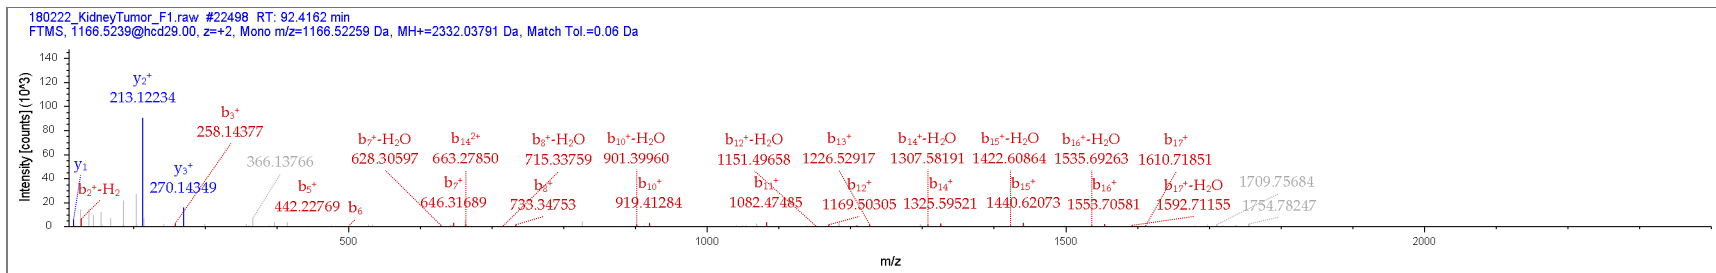

Sequence: SGAPDMSGEHSGFLDLSGLQSLIEP, M6-Oxidation (15.99492 Da), S21-Hex(1)HexNAc(1) (365.13220 Da)

Charge: +3, Monoisotopic m/z: 994.78533 Da (+0.2 mmu/+0.2 ppm), MH+: 2982.34144 Da, RT: 109.8414 min,

Identified with: Sequest HT (v1.17); XCorr:6.19, Percolator q-Value:5.0e-5, Percolator PEP:1.9e-3, Ions matched by search engine: 0/0

Fragment match tolerance used for search: 0.06 Da

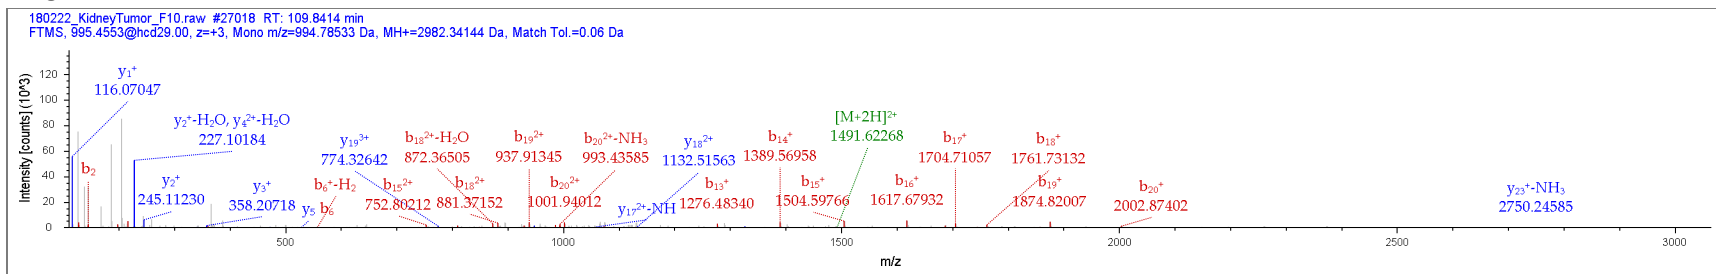



Sequence: SFQPEFSSGAEELVDH, S1-Hex(1)HexNAc(1) (365.13220 Da)

Charge: +2, Monoisotopic m/z: 1107.98285 Da (+1.17 mmu/+1.05 ppm), MH+: 2214.95843 Da, RT: 82.1249 min,

Identified with: Sequest HT (v1.17); XCorr:2.94, Percolator q-Value:0.0e0, Percolator PEP:2.3e-4, Ions matched by search engine: 0/0

Fragment match tolerance used for search: 0.06 Da

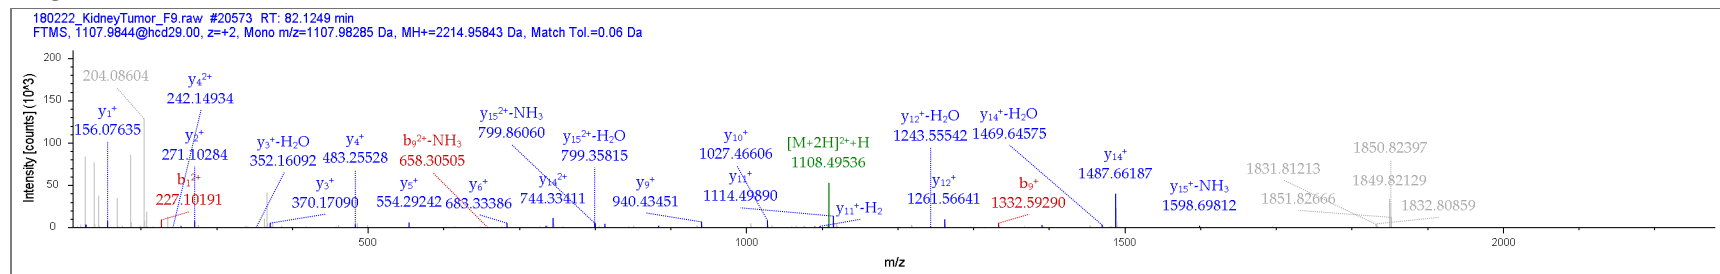

Sequence: SESNNYMNHVAK, M7-Oxidation (15.99492 Da), K12-GuanidinyI (42.02180 Da), S1-Hex(1)HexNAc(1) (365.13220 Da)

Charge: +3, Monoisotopic m/z: 606.26025 Da (+0.27 mmu/+0.44 ppm), MH+: 1816.76620 Da, RT: 24.5959 min,

Identified with: Sequest HT (v1.17); XCorr:1.95, Percolator q-Value:0.0e0, Percolator PEP:3.4e-3, Ions matched by search engine: 0/0

Fragment match tolerance used for search: 0.06 Da

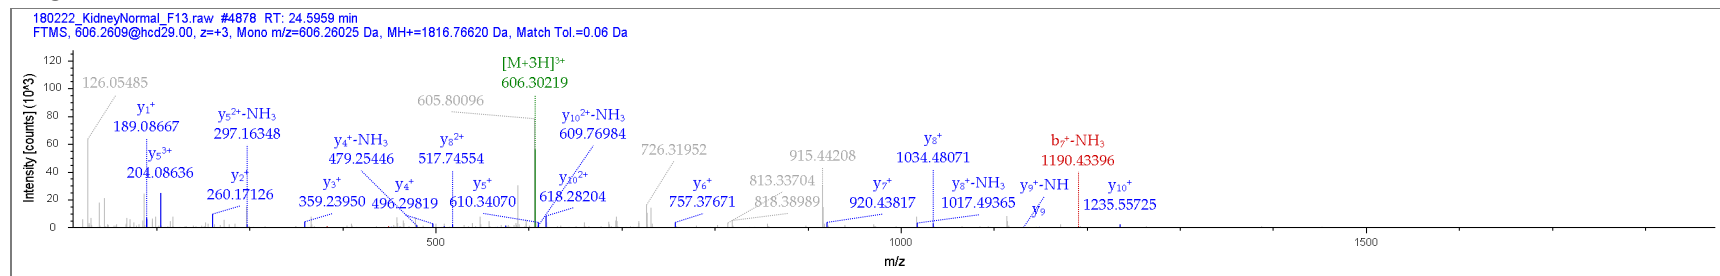

Sequence: SCLDTQYTCDNHQISK, C2-Carbamidomethyl (57.02146 Da), C9-Carbamidomethyl (57.02146 Da), C14-Carbamidomethyl (57.02146 Da), K17-GuanidinyI (42.02180 Da), S1-Hex(1)HexNAc(1) (365.13220 Da)

Charge: +3, Monoisotopic m/z: 846.34478 Da (-0.9 mmu/-1.07 ppm), MH+: 2537.01979 Da, RT: 37.0392 min,

Identified with: Sequest HT (v1.17); XCorr:3.22, Percolator q-Value:0.0e0, Percolator PEP:1.3e-4, Ions matched by search engine: 0/0

Fragment match tolerance used for search: 0.06 Da

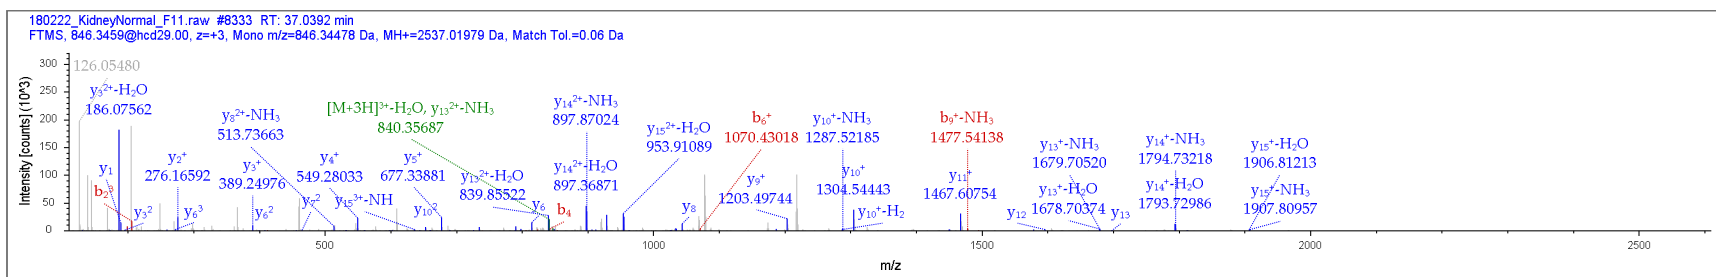

Sequence: SEMDVPPAHPEEEIVLR, M3-Oxidation (15.99492 Da), S1-Hex(1)HexNAc(1) (365.13220 Da)

Charge: +3, Monoisotopic m/z: 777.02925 Da (-0.66 mmu/-0.84 ppm), MH+: 2329.07320 Da, RT: 64.7201 min,

Identified with: Sequest HT (v1.17); XCorr:3.36, Percolator q-Value:0.0e0, Percolator PEP:2.2e-5, Ions matched by search engine: 0/0

Fragment match tolerance used for search: 0.06 Da

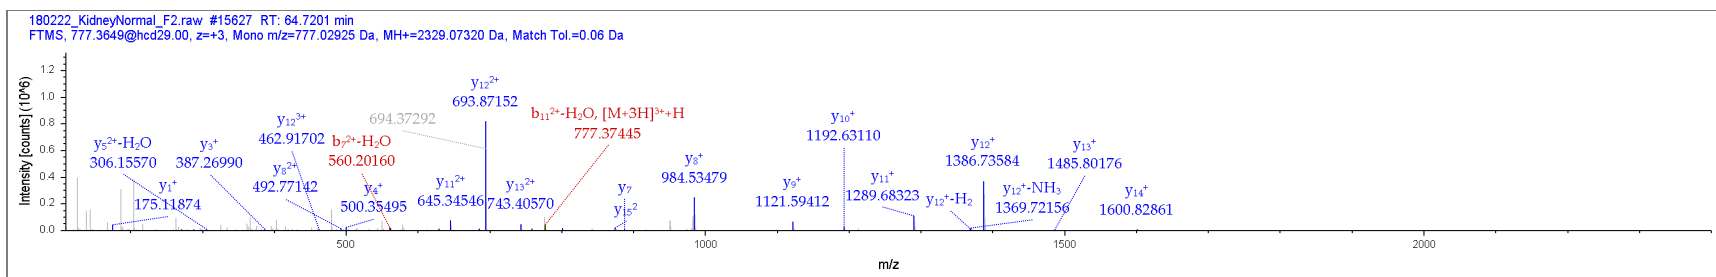

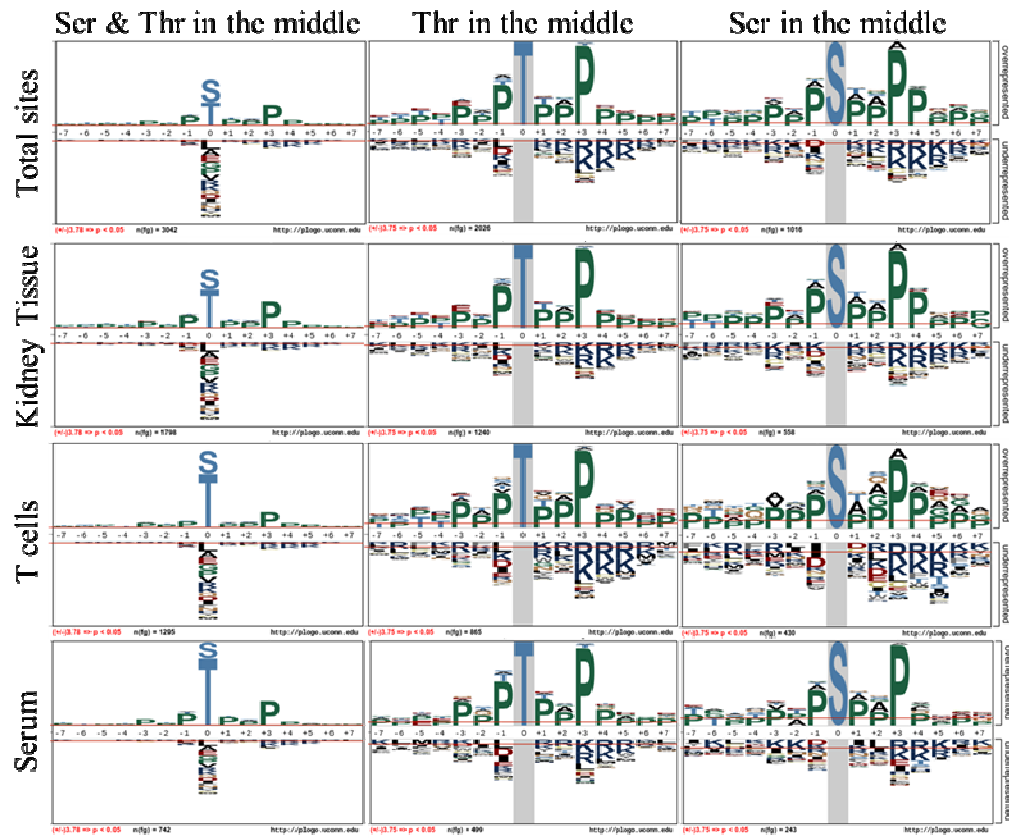

Appendix Figure S3: Motif analysis of the O-linked glycosylation sites identified from different samples.

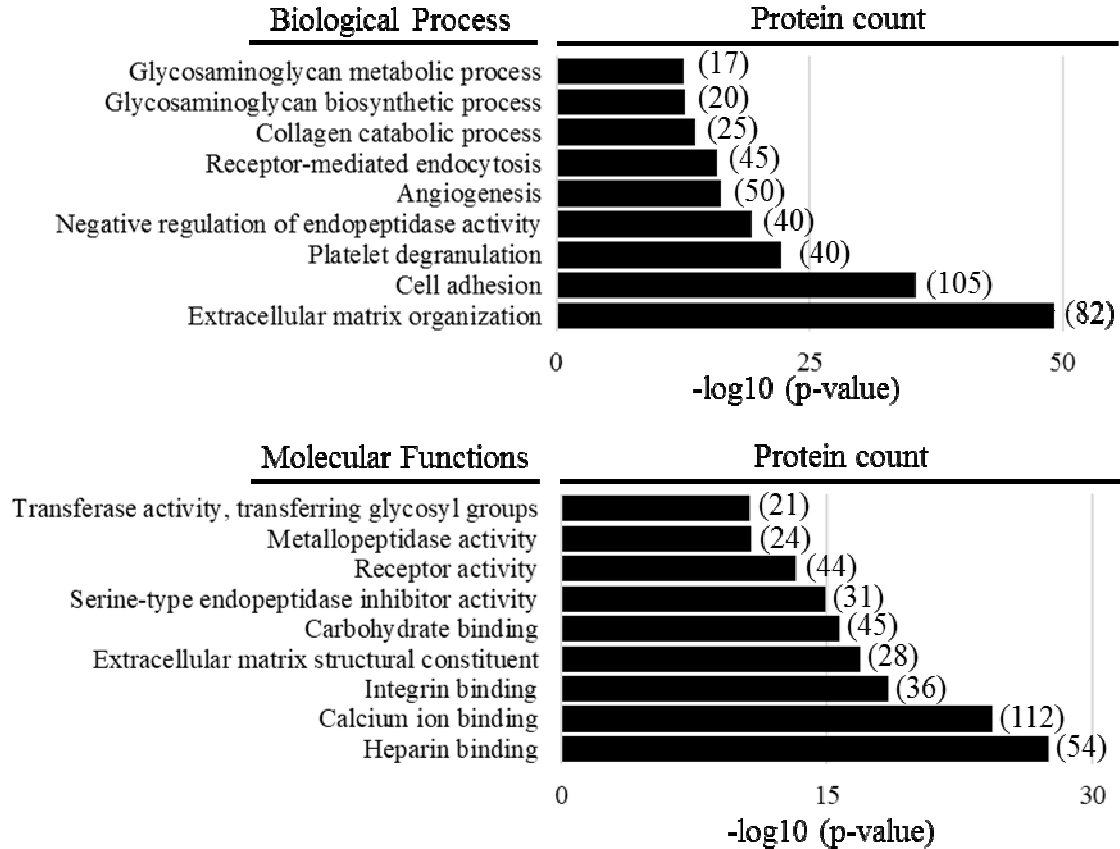

**Appendix Figure S4: Biological processes and molecular functions of the identified O-linked glycoproteins.**

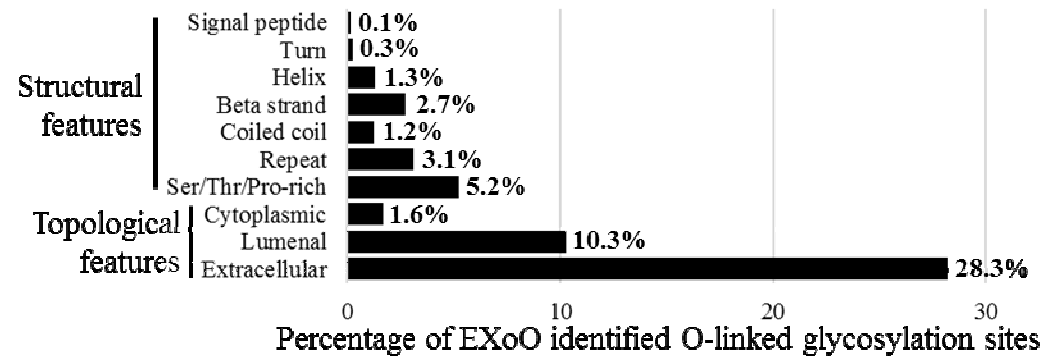

**Appendix Figure S5: Localization of O-linked glycosylation sites to protein structural and topological features.**

| Protein Accession # | Gene Name | Protein Name                                                     | Fold Change tumor/normal (log2) | Differential PSM between tumor and normal |
|---------------------|-----------|------------------------------------------------------------------|---------------------------------|-------------------------------------------|
| P05121              | SERPINE1  | Plasminogen activator inhibitor 1                                | Tumor                           | 18                                        |
| Q16790              | CA9       | Carbonic anhydrase 9                                             | 3.7                             | 12                                        |
| Q8NHJ6              | LILRB4    | Leukocyte immunoglobulin-like receptor subfamily B member 4      | 3.0                             | 14                                        |
| P27658              | COL8A1    | Collagen alpha-1(VIII) chain                                     | 2.7                             | 127                                       |
| P48960              | CD97      | EGF-like module-containing mucin-like hormone receptor-like 2    | 2.5                             | 14                                        |
| P19823              | ITIH2     | Inter-alpha-trypsin inhibitor heavy chain H2                     | 2.5                             | 415                                       |
| P50281              | MMP14     | Matrix metalloproteinase-14                                      | 2.5                             | 18                                        |
| Q68BL8              | OLFML2B   | Olfactomedin-like protein 2B isoform 2                           | 2.3                             | 15                                        |
| Q99715              | COL12A1   | Collagen alpha-1(XII) chain                                      | 2.3                             | 412                                       |
| P15502              | ELN       | Elastin                                                          | 2.2                             | 13                                        |
| P49257              | LMAN1     | Protein ERGIC-53                                                 | 2.2                             | 14                                        |
| P98095              | FBLN2     | Fibulin-2                                                        | 2.1                             | 247                                       |
| Q14767              | LTBP2     | Latent-transforming growth factor beta-binding protein 2         | 2.0                             | 198                                       |
| Q96DB9              | FXYD5     | FXYD domain-containing ion transport regulator 5                 | 1.9                             | 17                                        |
| Q9BY76              | ANGPTL4   | Angiopoietin-related protein 4                                   | 1.8                             | 96                                        |
| Q9UKP4              | ADAMTS7   | A disintegrin and metalloproteinase with thrombospondin motifs 7 | 1.7                             | 88                                        |
| P06213              | INSR      | Insulin receptor                                                 | 1.6                             | 13                                        |
| Q12805              | EFEMP1    | EGF-containing fibulin-like extracellular matrix protein 1       | 1.6                             | 258                                       |
| Q92896              | GLG1      | Golgi apparatus protein 1                                        | 1.5                             | 12                                        |
| Q9BXX0              | EMILIN2   | EMILIN-2                                                         | 1.5                             | 58                                        |
| P16112              | ACAN      | Aggrecan core protein                                            | 1.5                             | 832                                       |
| Q9UBP4              | DKK3      | Dickkopf-related protein 3                                       | 1.4                             | 32                                        |
| Q9NS15              | LTBP3     | Latent-transforming growth factor beta-binding protein 3         | 1.4                             | 12                                        |
| Q12797              | ASPH      | Aspartyl/asparaginyl beta-hydroxylase                            | 1.3                             | 42                                        |
| P23470              | PTPRG     | Receptor-type tyrosine-protein phosphatase gamma                 | 1.3                             | 12                                        |
| Q9H8L6              | MMRN2     | Multimerin-2                                                     | 1.3                             | 14                                        |
| P13611              | VCAN      | Versican core protein                                            | 1.3                             | 1216                                      |
| Q8IUX7              | AEBP1     | Adipocyte enhancer-binding protein 1                             | 1.2                             | 42                                        |
| Q8TDQ1              | CD300LF   | CMRF35-like molecule 1                                           | 1.2                             | 11                                        |
| Q14515              | SPARCL1   | SPARC-like protein 1                                             | 1.1                             | 40                                        |
| Q14766              | LTBP1     | Latent-transforming growth factor beta-binding protein 1         | 1.1                             | 13                                        |
| Q14314              | FGL2      | Fibroleukin                                                      | 1.1                             | 27                                        |
| Q6LXD5              | SEZ6L2    | Seizure 6-like protein 2                                         | 1.1                             | 19                                        |
| P02751              | FN1       | Fibronectin                                                      | 1.1                             | 218                                       |
| P16070              | CD44      | CD44 antigen                                                     | 1.0                             | 17                                        |
| Q6IEE7              | TMEM132E  | Transmembrane protein 132E                                       | -1.0                            | 14                                        |
| P15144              | ANPEP     | Aminopeptidase N                                                 | -1.1                            | 181                                       |
| Q60494              | CUBN      | Cubilin                                                          | -1.2                            | 66                                        |
| Q8N474              | SFRP1     | Secreted frizzled-related protein 1                              | -1.2                            | 47                                        |
| Q75309              | CDH16     | Cadherin-16                                                      | -1.2                            | 14                                        |
| Q9NR34              | MAN1C1    | Mannosyl-oligosaccharide 1,2-alpha-mannosidase IC                | -1.2                            | 11                                        |
| P98164              | LRP2      | Low-density lipoprotein receptor-related protein 2               | -1.2                            | 818                                       |
| Q43451              | MGAM      | Maltase-glucoamylase                                             | -1.3                            | 62                                        |
| P02724              | GYPA      | Glycophorin-A                                                    | -1.3                            | 40                                        |
| Q9ULC0              | EMCN      | Endomucin                                                        | -1.4                            | 142                                       |
| Q95428              | PAPLN     | Papilin                                                          | -1.4                            | 79                                        |
| Q9UGT4              | SUSD2     | Sushi domain-containing protein 2                                | -1.6                            | 14                                        |
| Q9UJW2              | TINAG     | Tubulointerstitial nephritis antigen                             | -1.6                            | 60                                        |
| Q6ZMM2              | ADAMTS15  | ADAMTS-like protein 5                                            | -1.7                            | 13                                        |
| P36269              | GGT5      | Gamma-glutamyltransferase 5                                      | -1.7                            | 13                                        |
| Q5U48               | CRB2      | Protein crumbs homolog 2                                         | -1.9                            | 22                                        |
| Q96SM3              | CPXM1     | Probable carboxypeptidase X1                                     | -2.0                            | 13                                        |
| Q96A83              | COL26A1   | Collagen alpha-1(XXVI) chain                                     | -2.1                            | 23                                        |
| Q2UY09              | COL28A1   | Collagen alpha-1(XXVIII) chain                                   | Normal                          | 15                                        |
| P13866              | SLC5A1    | Sodium/glucose cotransporter 1                                   | Normal                          | 20                                        |
| Q8N695              | SLC5A8    | Sodium-coupled monocarboxylate transporter 1                     | Normal                          | 26                                        |

**Appendix Table S1: Differentially expressed O-linked glycoproteins in tumor vs normal kidney tissues.**
